# Supplementary material
Source: publisher site journal article supplement (https://www.dovepress.com/article/465650)
Supplement: Supplementary file 1 [file get_supplementary_file.php]

**Supplementary Table 1.** Baseline demographic and cognitive characteristics of the participants.

| <b>Characteristics</b>          | <b>MCI (n=6)</b> |
|---------------------------------|------------------|
| Age, mean $\pm$ SD, y           | 70.16 $\pm$ 3.43 |
| Sex, No. (%)                    |                  |
| Men                             | 3 (50 %)         |
| Women                           | 3 (50 %)         |
| Education level, No. (%)        |                  |
| Less than six years             | 2 (33%)          |
| More than six years             | 4 (66%)          |
| Occupation, No. (%)             |                  |
| Employee                        | 2 (33 %)         |
| Unemployed                      | 4 (66 %)         |
| Alcohol intake, No. (%)         |                  |
| No                              | 4 (66 %)         |
| Current                         | 2 (33 %)         |
| Smoking status, No. (%)         |                  |
| No                              | 3 (50 %)         |
| Past smoking                    | 3 (50 %)         |
| Cognitive status, mean $\pm$ SD |                  |
| MoCA-K                          | 19.00 $\pm$ 3.10 |

MoCA-K, Korean version of Montreal Cognitive Assessment.

**Supplementary Table 2.** Ingredients and content of herbal medicines

| Herbal<br>medicine             | Gamiguibi-tang                           |            | Yukmijihwang-tang                         |            | Banhasasim-tang                       |            |
|--------------------------------|------------------------------------------|------------|-------------------------------------------|------------|---------------------------------------|------------|
|                                | Ingredient name                          | Amount (g) | Ingredient name                           | Amount (g) | Ingredient name                       | Amount (g) |
| Main<br>ingredient             | <i>Panax ginseng</i> C.A. Meyer          | 1.00       | <i>Rehmannia<br/>glutinosa</i> Liboschitz | 2.00       | <i>Pinellia ternata</i> Breitenbach   | 2.50       |
|                                | <i>Atractylodes japonica</i> Koidzumi    | 1.00       | <i>Dioscorea batatas</i> Decaisne         | 1.00       | <i>Scutellaria baicalensis</i> Georgi | 1.88       |
|                                | <i>Poria cocos</i> Wolf                  | 1.00       | <i>Cornus officinalis</i> Siebold         | 1.00       | <i>Panax ginseng</i> C.A. Meyer       | 1.88       |
|                                | <i>Dimocarpus longan</i> Loureiro        | 1.00       | <i>Paeonia suffruticosa</i> Andrew        | 1.00       | <i>Glycyrrhiza uralensis</i> Fischer  | 1.88       |
|                                | <i>Astragalus<br/>membranaceus</i> Bunge | 1.00       | <i>Poria cocos</i> Wolf                   | 1.00       | <i>Zingiber officinale</i> Roscoe     | 1.25       |
|                                | <i>Angelica gigas</i> Nakai              | 0.67       | <i>Alisma orientale</i> Juzepzuk          | 1.00       | <i>Coptis japonica</i> Makino         | 0.63       |
|                                | <i>Polygala tenuifolia</i> Willdenow     | 0.67       |                                           |            | <i>Zingiber officinale</i> Roscoe     | 0.50       |
|                                | <i>Bupleurum falcatum</i> Linné          | 1.00       |                                           |            | <i>Zizyphus jujuba</i> Miller         | 0.67       |
|                                | <i>Gardenia jasminoides</i> Ellis        | 0.67       |                                           |            |                                       |            |
|                                | <i>Glycyrrhiza uralensis</i> Fischer     | 0.33       |                                           |            |                                       |            |
| <i>Aucklandia lappa</i> Decne. | 0.33                                     |            |                                           |            |                                       |            |

---

|                                                                       |       |      |       |
|-----------------------------------------------------------------------|-------|------|-------|
| <i>Zizyphus jujuba</i> Miller<br>var. <i>inermis</i> Rehder           | 0.67  |      |       |
| <i>Zingiber officinale</i> Roscoe<br>(dried)                          | 0.33  |      |       |
| <i>Zizyphus jujuba</i> Miller<br>var. <i>spinosa</i> Hu ex H. F. Chou | 1.00  |      |       |
| <i>Paeonia suffruticosa</i> Andrew                                    | 0.67  |      |       |
| <b>Total</b>                                                          | 11.34 | 7.00 | 11.19 |

---



**Supplementary Figure 1.** Distribution of common and unique targets across the three formulas.

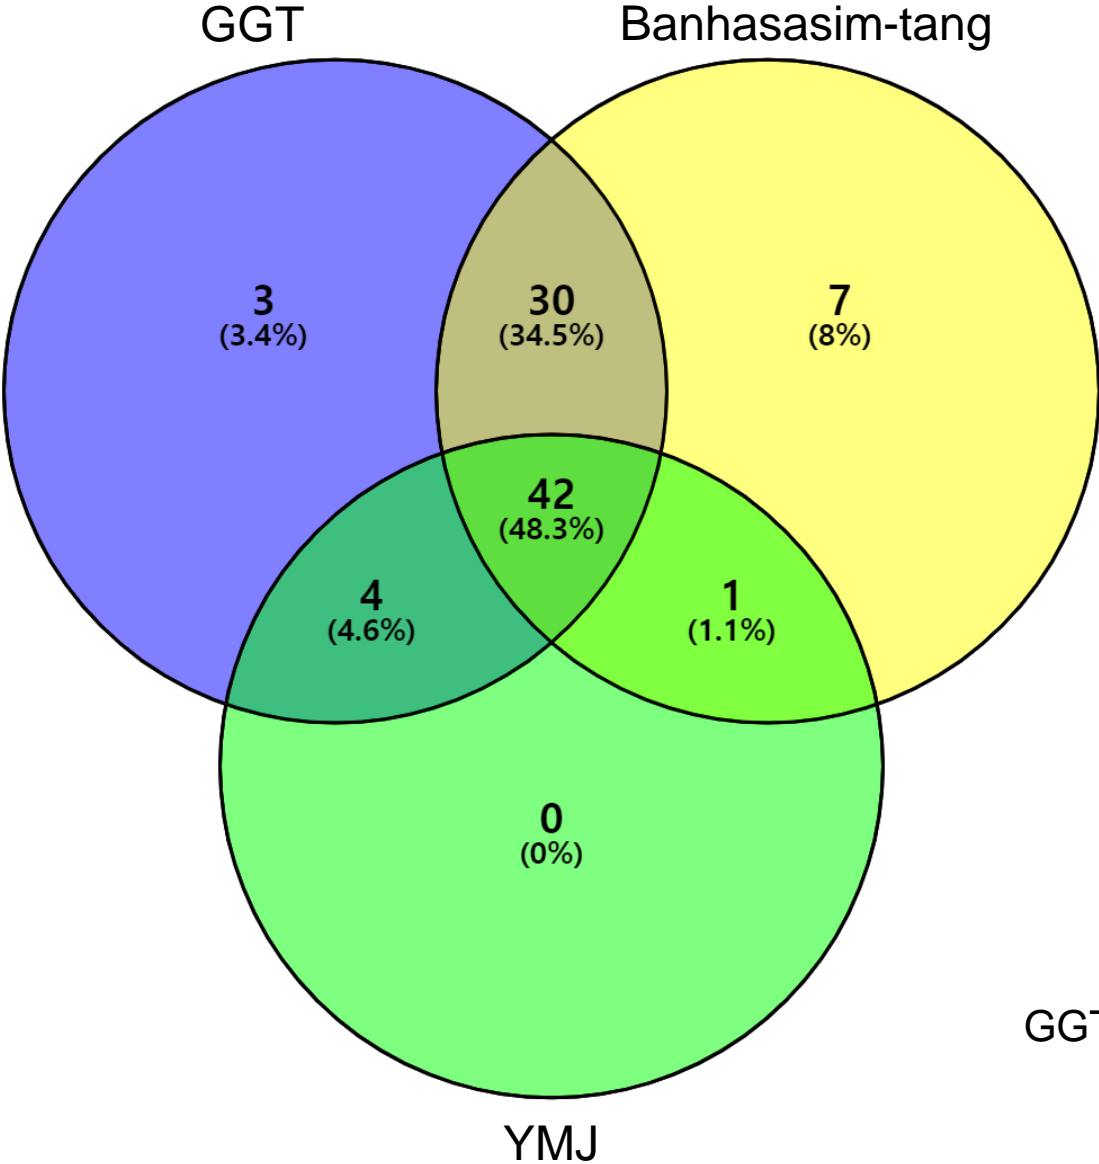

GGT, Gamiguibi-tang; YMJ, Yukmijihwang-tang

**Supplementary Figure 2.** Herbal formula-induced cytokine alterations in patients with MCI, assessed using a human cytokine multiplex assay.

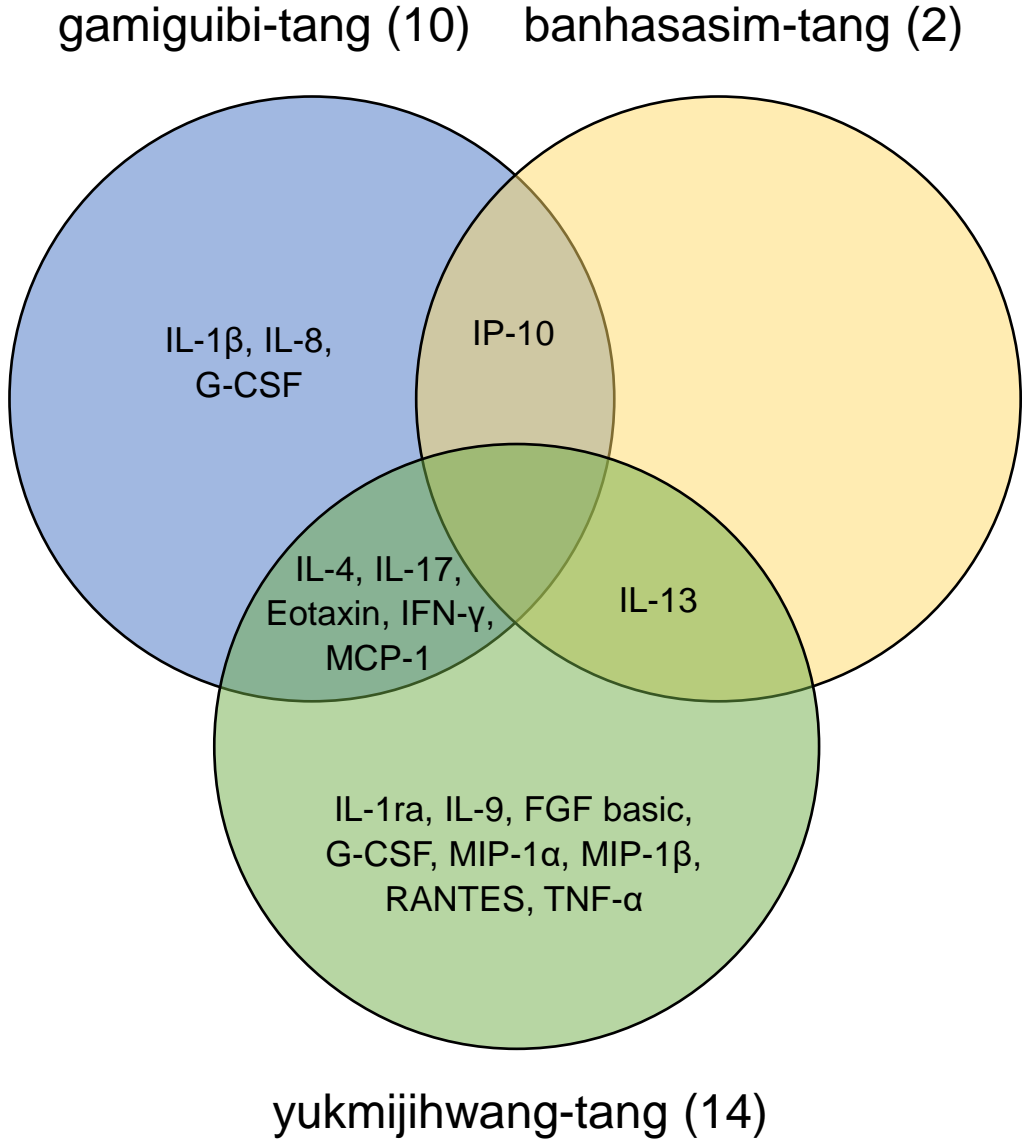

MCI, mild cognitive impairment; IL, interleukin; G-CSF, granulocyte-colony-stimulating factor; IP, inducible protein; IFN, interferon; MCP, monocyte chemoattractant protein; FGF, fibroblast growth factor; MIP, macrophage inflammatory protein; RANTES, regulated on activation normal T-cell expressed and presumably secreted; TNF, tumor necrosis factor

**Supplementary Figure 3.** Organ enrichment (red) and depletion (blue) of (a) common, and individual [(b) GGT, (c) Banhasasim-tang, and (d) YMJ], targets of the three formulas.

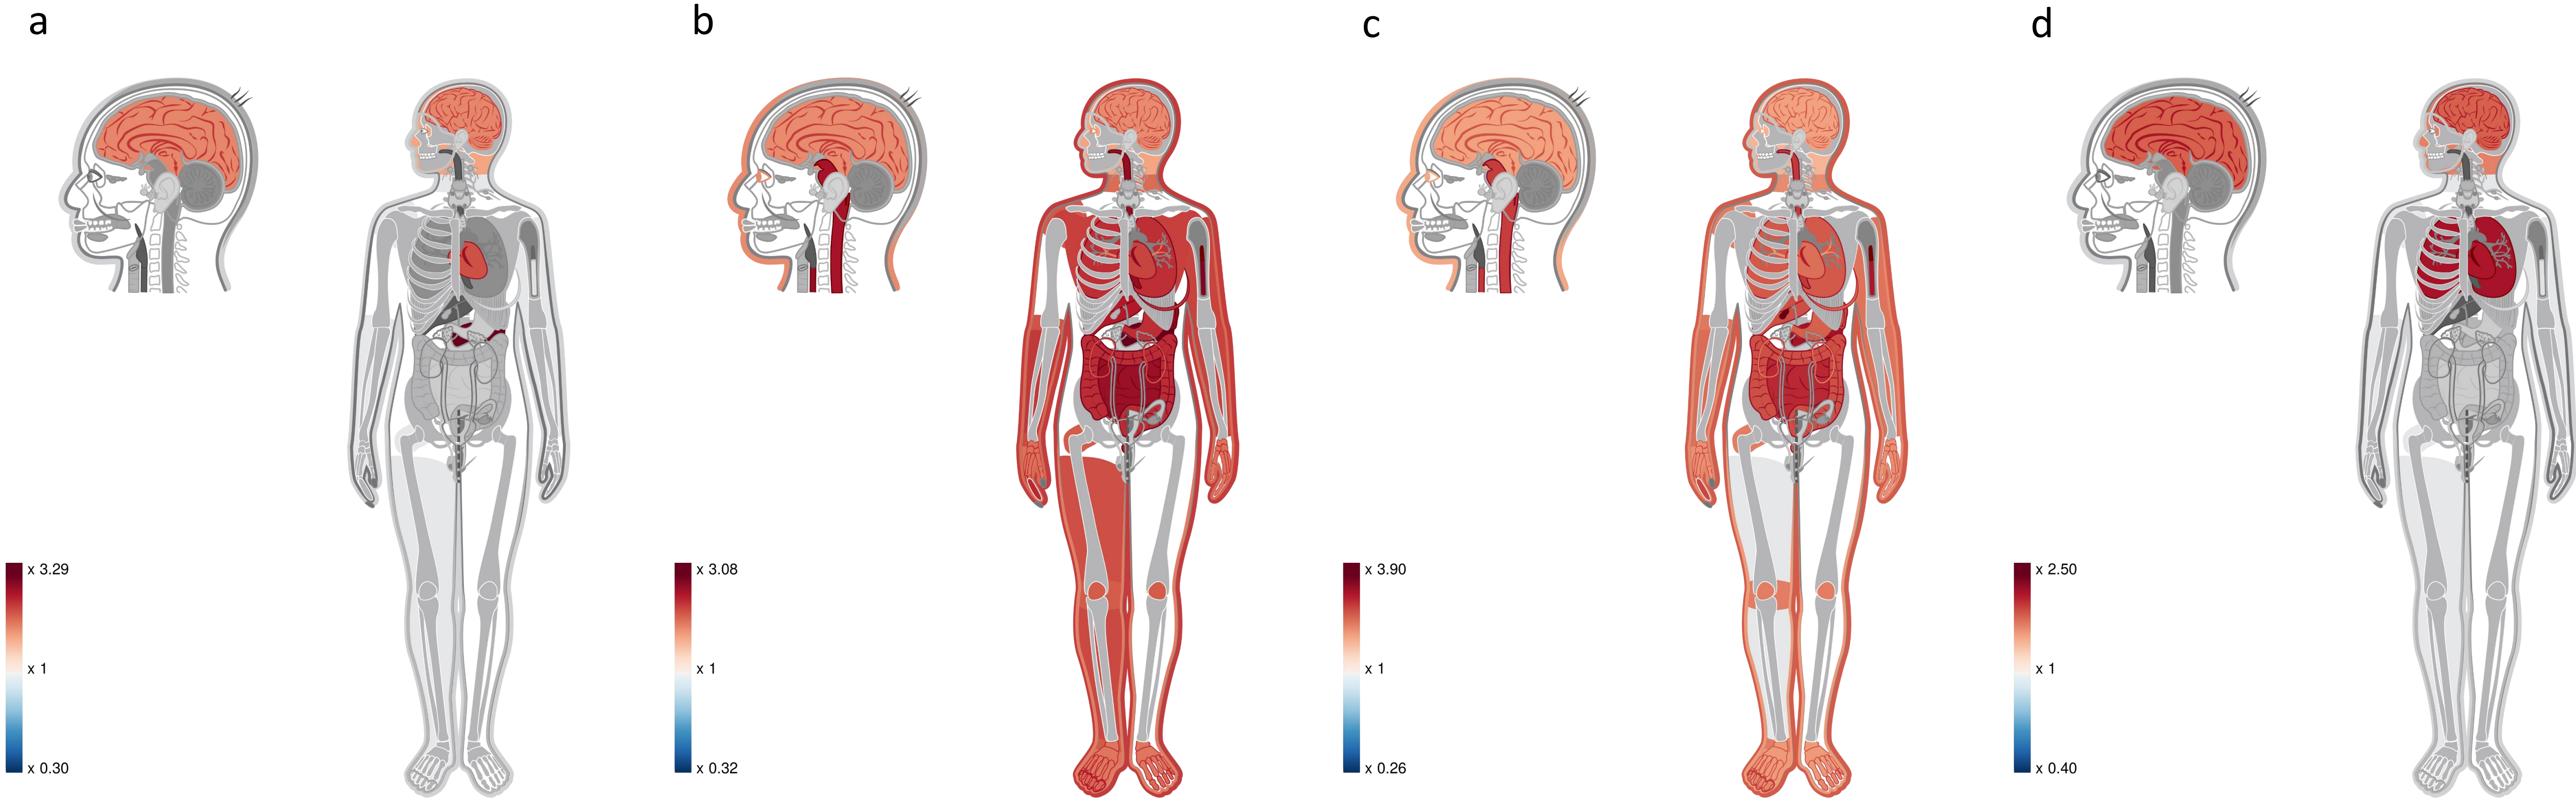

GGT, Gamiguibi-tang; YMJ, Yukmijihwang-tang

## Supplementary 1

### <GGT target list>

| #  | Symbol  | Description (Query "mild cognitive impairment")     | Type    | Score | -Log10(p) | Average Disease Causing Likelihood |
|----|---------|-----------------------------------------------------|---------|-------|-----------|------------------------------------|
| 1  | MAPT    | Microtubule Associated Protein Tau                  | Protein | 19.5  | 4.06      | 14.1                               |
| 2  | DGUOK   | Deoxyguanosine Kinase                               | Protein | 11.98 | 3.64      | 52.5                               |
| 3  | BCHE    | Butyrylcholinesterase                               | Protein | 11.7  | 3.59      | 18                                 |
| 4  | ACHE    | Acetylcholinesterase (Cartwright Blood Group)       | Protein | 9.93  | 3.14      | 43.9                               |
| 5  | IL1B    | Interleukin 1 Beta                                  | Protein | 9.64  | 3.11      | 81.8                               |
| 6  | ADRA2B  | Adrenoceptor Alpha 2B                               | Protein | 8.77  | 2.96      | 49.7                               |
| 7  | ABCA7   | ATP Binding Cassette Subfamily A Member 7           | Protein | 8.36  | 2.94      | 2                                  |
| 8  | DLG4    | Discs Large MAGUK Scaffold Protein 4                | Protein | 7.99  | 2.91      | 82.8                               |
| 9  | SLC6A3  | Solute Carrier Family 6 Member 3                    | Protein | 7.28  | 2.89      | 84.9                               |
| 10 | INS     | Insulin                                             | Protein | 6.89  | 2.87      | 74.5                               |
| 11 | TNF     | Tumor Necrosis Factor                               | Protein | 6.53  | 2.82      | 70.4                               |
| 12 | NOS3    | Nitric Oxide Synthase 3                             | Protein | 5.56  | 2.74      | 58.5                               |
| 13 | MTHFR   | Methylenetetrahydrofolate Reductase                 | Protein | 4.92  | 2.71      | 22.2                               |
| 14 | COMT    | Catechol-O-Methyltransferase                        | Protein | 4.59  | 2.68      | 11.8                               |
| 15 | ACE     | Angiotensin I Converting Enzyme                     | Protein | 4.59  | 2.68      | 15.8                               |
| 16 | TP53    | Tumor Protein P53                                   | Protein | 4.15  | 2.65      | 72.8                               |
| 17 | HMOX1   | Heme Oxygenase 1                                    | Protein | 3.9   | 2.62      | 31.9                               |
| 18 | CHRNA7  | Cholinergic Receptor Nicotinic Alpha 7 Subunit      | Protein | 3.84  | 2.61      | 58.3                               |
| 19 | BCL2    | BCL2 Apoptosis Regulator                            | Protein | 3.64  | 2.57      | 48.6                               |
| 20 | DNMT3A  | DNA Methyltransferase 3 Alpha                       | Protein | 3.64  | 2.57      | 86.7                               |
| 21 | DRD2    | Dopamine Receptor D2                                | Protein | 3.62  | 2.56      | 63.3                               |
| 22 | HTR2A   | 5-Hydroxytryptamine Receptor 2A                     | Protein | 3.5   | 2.54      | 62.1                               |
| 23 | MAOB    | Monoamine Oxidase B                                 | Protein | 3.42  | 2.52      | 84.5                               |
| 24 | ESR1    | Estrogen Receptor 1                                 | Protein | 3.38  | 2.52      | 68.5                               |
| 25 | BLVRA   | Biliverdin Reductase A                              | Protein | 3.19  | 2.47      | 39.8                               |
| 26 | VDR     | Vitamin D Receptor                                  | Protein | 3.12  | 2.44      | 64.2                               |
| 27 | ADORA2A | Adenosine A2a Receptor                              | Protein | 3.08  | 2.44      | 64.8                               |
| 28 | DRD3    | Dopamine Receptor D3                                | Protein | 3.08  | 2.44      | 60.2                               |
| 29 | HMGCR   | 3-Hydroxy-3-Methylglutaryl-CoA Reductase            | Protein | 2.97  | 2.4       | 83.1                               |
| 30 | ITPR1   | Inositol 1,4,5-Trisphosphate Receptor Type 1        | Protein | 2.91  | 2.4       | 73.5                               |
| 31 | AIFM1   | Apoptosis Inducing Factor Mitochondria Associated 1 | Protein | 2.91  | 2.4       | 72.5                               |



|    |          |                                                        |         |      |         |      |
|----|----------|--------------------------------------------------------|---------|------|---------|------|
| 32 | MPO      | Myeloperoxidase                                        | Protein | 2.91 | 2.4     | 33.8 |
| 33 | PIK3R1   | Phosphoinositide-3-Kinase Regulatory Subunit 1         | Protein | 2.91 | 2.4     | 54.4 |
| 34 | SCN4A    | Sodium Voltage-Gated Channel Alpha Subunit 4           | Protein | 2.91 | 2.4     | 43.3 |
| 35 | ABCB1    | ATP Binding Cassette Subfamily B Member 1              | Protein | 2.49 | 2.22    | 58   |
| 36 | DRD5     | Dopamine Receptor D5                                   | Protein | 2.49 | 2.22    | 34.6 |
| 37 | SIGMAR1  | Sigma Non-Opioid Intracellular Receptor 1              | Protein | 2.49 | 2.22    | 36.3 |
| 38 | RAB7A    | RAB7A, Member RAS Oncogene Family                      | Protein | 2.49 | 2.22    | 82   |
| 39 | PTGS2    | Prostaglandin-Endoperoxide Synthase 2                  | Protein | 2.47 | 2.19    | 66.5 |
| 40 | ABCA1    | ATP Binding Cassette Subfamily A Member 1              | Protein | 2.47 | 2.19    | 51.7 |
| 41 | ALB      | Albumin                                                | Protein | 2.47 | 2.19    | 82.3 |
| 42 | ESR2     | Estrogen Receptor 2                                    | Protein | 2.47 | 2.19    | 54.1 |
| 43 | SLC6A4   | Solute Carrier Family 6 Member 4                       | Protein | 2.47 | 2.19    | 73   |
| 44 | GSTO1    | Glutathione S-Transferase Omega 1                      | Protein | 2.47 | 2.19    | 17.7 |
| 45 | GRIN2A   | Glutamate Ionotropic Receptor NMDA Type Subunit 2A     | Protein | 2.35 | 2.16    | 78.3 |
| 46 | OPRM1    | Opioid Receptor Mu 1                                   | Protein | 2.35 | 2.16    | 7.8  |
| 47 | GLUL     | Glutamate-Ammonia Ligase                               | Protein | 2.35 | 2.16    | 87.5 |
| 48 | ALDH2    | Aldehyde Dehydrogenase 2 Family Member                 | Protein | 2.35 | 2.16    | 51.1 |
| 49 | MMP9     | Matrix Metalloproteinase 9                             | Protein | 2.22 | 2.13    | 20.3 |
| 50 | VCAM1    | Vascular Cell Adhesion Molecule 1                      | Protein | 1.87 | 2.09    | 53.5 |
| 51 | DAO      | D-Amino Acid Oxidase                                   | Protein | 1.87 | 2.09    | 51   |
| 52 | DPP4     | Dipeptidyl Peptidase 4                                 | Protein | 1.87 | 2.09    | 68.7 |
| 53 | CBS      | Cystathionine Beta-Synthase                            | Protein | 1.85 | 2.05    | 54.7 |
| 54 | DBH      | Dopamine Beta-Hydroxylase                              | Protein | 1.77 | 2.05    | 16.1 |
| 55 | NCF1     | Neutrophil Cytosolic Factor 1                          | Protein | 1.76 | 2.04 ND |      |
| 56 | CYBB     | Cytochrome B-245 Beta Chain                            | Protein | 1.76 | 2.04    | 71.2 |
| 57 | OPRK1    | Opioid Receptor Kappa 1                                | Protein | 1.76 | 2.04    | 72.1 |
| 58 | PLG      | Plasminogen                                            | Protein | 1.76 | 2.04    | 38.2 |
| 59 | CHGA     | Chromogranin A                                         | Protein | 1.76 | 2.04    | 15.2 |
| 60 | PRKAA1   | Protein Kinase AMP-Activated Catalytic Subunit Alpha 1 | Protein | 1.76 | 2.04    | 83.4 |
| 61 | GPX3     | Glutathione Peroxidase 3                               | Protein | 1.76 | 2.04    | 74.2 |
| 62 | SLC25A20 | Solute Carrier Family 25 Member 20                     | Protein | 1.76 | 2.04    | 70.3 |
| 63 | ACO2     | Aconitase 2                                            | Protein | 1.76 | 2.04    | 80.9 |
| 64 | TH       | Tyrosine Hydroxylase                                   | Protein | 1.45 | 1.94    | 22.6 |
| 65 | MAP2     | Microtubule Associated Protein 2                       | Protein | 1.45 | 1.94    | 67.5 |
| 66 | CACNA1A  | Calcium Voltage-Gated Channel Subunit Alpha1 A         | Protein | 1.2  | 1.92    | 51.4 |
| 67 | HTR1A    | 5-Hydroxytryptamine Receptor 1A                        | Protein | 1.13 | 1.91    | 56.9 |

|     |        |                                                                        |         |      |         |      |
|-----|--------|------------------------------------------------------------------------|---------|------|---------|------|
| 68  | TLR4   | Toll Like Receptor 4                                                   | Protein | 1    | 1.9     | 25.4 |
| 69  | MTR    | 5-Methyltetrahydrofolate-Homocysteine Methyltransferase                | Protein | 1    | 1.9     | 44.6 |
| 70  | NOS2   | Nitric Oxide Synthase 2                                                | Protein | 1    | 1.9     | 46.6 |
| 71  | RAC1   | Rac Family Small GTPase 1                                              | Protein | 1    | 1.9     | 78.2 |
| 72  | GRK2   | G Protein-Coupled Receptor Kinase 2                                    | Protein | 1    | 1.9     | 87.9 |
| 73  | GRIA2  | Glutamate Ionotropic Receptor AMPA Type Subunit 2                      | Protein | 0.88 | 1.88    | 84.2 |
| 74  | NOS1   | Nitric Oxide Synthase 1                                                | Protein | 0.88 | 1.88    | 50.6 |
| 75  | CNR1   | Cannabinoid Receptor 1                                                 | Protein | 0.88 | 1.88    | 87.5 |
| 76  | GSR    | Glutathione-Disulfide Reductase                                        | Protein | 0.88 | 1.88    | 31.7 |
| 77  | PDE4A  | Phosphodiesterase 4A                                                   | Protein | 0.88 | 1.88    | 57.4 |
| 78  | APLP1  | Amyloid Beta Precursor Like Protein 1                                  | Protein | 0.88 | 1.88    | 71.1 |
| 79  | GLRX   | Glutaredoxin                                                           | Protein | 0.88 | 1.88    | 67.2 |
| 80  | AKT1   | AKT Serine/Threonine Kinase 1                                          | Protein | 0.85 | 1.84    | 90.8 |
| 81  | AFG3L2 | AFG3 Like Matrix AAA Peptidase Subunit 2                               | Protein | 0.85 | 1.84    | 86.3 |
| 82  | SLC1A3 | Solute Carrier Family 1 Member 3                                       | Protein | 0.85 | 1.84    | 58   |
| 83  | MAOA   | Monoamine Oxidase A                                                    | Protein | 0.85 | 1.84    | 84.1 |
| 84  | TUBA1A | Tubulin Alpha 1a                                                       | Protein | 0.85 | 1.84 ND |      |
| 85  | DNMT1  | DNA Methyltransferase 1                                                | Protein | 0.85 | 1.84    | 73.2 |
| 86  | CHRM1  | Cholinergic Receptor Muscarinic 1                                      | Protein | 0.85 | 1.84    | 87.1 |
| 87  | MAT1A  | Methionine Adenosyltransferase 1A                                      | Protein | 0.63 | 1.81    | 84.3 |
| 88  | TPH1   | Tryptophan Hydroxylase 1                                               | Protein | 0.6  | 1.79    | 54.7 |
| 89  | CALR   | Calreticulin                                                           | Protein | 0.6  | 1.79    | 60.5 |
| 90  | PRKCB  | Protein Kinase C Beta                                                  | Protein | 0.6  | 1.79    | 87.4 |
| 91  | HPRT1  | Hypoxanthine Phosphoribosyltransferase 1                               | Protein | 0.6  | 1.79    | 77.5 |
| 92  | CASP9  | Caspase 9                                                              | Protein | 0.6  | 1.79    | 26.4 |
| 93  | LDLR   | Low Density Lipoprotein Receptor                                       | Protein | 0.6  | 1.79    | 58   |
| 94  | CXCR4  | C-X-C Motif Chemokine Receptor 4                                       | Protein | 0.6  | 1.79    | 78.3 |
| 95  | VLDLR  | Very Low Density Lipoprotein Receptor                                  | Protein | 0.6  | 1.79    | 60.6 |
| 96  | LRP2   | LDL Receptor Related Protein 2                                         | Protein | 0.6  | 1.79    | 23   |
| 97  | GLO1   | Glyoxalase I                                                           | Protein | 0.6  | 1.79    | 42.6 |
| 98  | HRH1   | Histamine Receptor H1                                                  | Protein | 0.6  | 1.79    | 43.3 |
| 99  | PIK3CD | Phosphatidylinositol-4,5-Bisphosphate 3-Kinase Catalytic Subunit Delta | Protein | 0.6  | 1.79    | 70.8 |
| 100 | ATM    | ATM Serine/Threonine Kinase                                            | Protein | 0.6  | 1.79    | 30.3 |
| 101 | PAWR   | Pro-Apoptotic WT1 Regulator                                            | Protein | 0.6  | 1.79    | 33.9 |
| 102 | GSTM1  | Glutathione S-Transferase Mu 1                                         | Protein | 0.6  | 1.79 ND |      |
| 103 | AOC3   | Amine Oxidase Copper Containing 3                                      | Protein | 0.6  | 1.79    | 19.4 |

|     |         |                                                       |         |     |      |      |
|-----|---------|-------------------------------------------------------|---------|-----|------|------|
| 104 | CNR2    | Cannabinoid Receptor 2                                | Protein | 0.6 | 1.79 | 60.7 |
| 105 | GRB2    | Growth Factor Receptor Bound Protein 2                | Protein | 0.6 | 1.79 | 81.1 |
| 106 | NCF2    | Neutrophil Cytosolic Factor 2                         | Protein | 0.6 | 1.79 | 13.9 |
| 107 | GRIA1   | Glutamate Ionotropic Receptor AMPA Type Subunit 1     | Protein | 0.6 | 1.79 | 61.3 |
| 108 | MTNR1A  | Melatonin Receptor 1A                                 | Protein | 0.6 | 1.79 | 41.6 |
| 109 | KCNC3   | Potassium Voltage-Gated Channel Subfamily C Member 3  | Protein | 0.6 | 1.79 | 67.5 |
| 110 | CHRM2   | Cholinergic Receptor Muscarinic 2                     | Protein | 0.6 | 1.79 | 63.1 |
| 111 | GSTP1   | Glutathione S-Transferase Pi 1                        | Protein | 0.6 | 1.79 | 33.1 |
| 112 | SUCLA2  | Succinate-CoA Ligase ADP-Forming Subunit Beta         | Protein | 0.6 | 1.79 | 34   |
| 113 | NQO1    | NAD(P)H Quinone Dehydrogenase 1                       | Protein | 0.6 | 1.79 | 14.7 |
| 114 | SUCLG1  | Succinate-CoA Ligase GDP/ADP-Forming Subunit Alpha    | Protein | 0.6 | 1.79 | 57.2 |
| 115 | ABL1    | ABL Proto-Oncogene 1, Non-Receptor Tyrosine Kinase    | Protein | 0.6 | 1.79 | 74.1 |
| 116 | ADORA1  | Adenosine A1 Receptor                                 | Protein | 0.6 | 1.79 | 79   |
| 117 | OGDH    | Oxoglutarate Dehydrogenase                            | Protein | 0.6 | 1.79 | 68.5 |
| 118 | PTGS1   | Prostaglandin-Endoperoxide Synthase 1                 | Protein | 0.6 | 1.79 | 25.3 |
| 119 | ITGB2   | Integrin Subunit Beta 2                               | Protein | 0.6 | 1.79 | 71.5 |
| 120 | ALDH5A1 | Aldehyde Dehydrogenase 5 Family Member A1             | Protein | 0.6 | 1.79 | 22.2 |
| 121 | COX5A   | Cytochrome C Oxidase Subunit 5A                       | Protein | 0.6 | 1.79 | 78.9 |
| 122 | PGR     | Progesterone Receptor                                 | Protein | 0.6 | 1.79 | 37.9 |
| 123 | PRKCA   | Protein Kinase C Alpha                                | Protein | 0.6 | 1.79 | 89.4 |
| 124 | SOAT1   | Sterol O-Acyltransferase 1                            | Protein | 0.6 | 1.79 | 48.2 |
| 125 | CHRNB2  | Cholinergic Receptor Nicotinic Beta 2 Subunit         | Protein | 0.6 | 1.79 | 84.8 |
| 126 | HTR3D   | 5-Hydroxytryptamine Receptor 3D                       | Protein | 0.6 | 1.79 | 11.2 |
| 127 | GRIA3   | Glutamate Ionotropic Receptor AMPA Type Subunit 3     | Protein | 0.6 | 1.79 | 90   |
| 128 | PLD2    | Phospholipase D2                                      | Protein | 0.6 | 1.79 | 11.5 |
| 129 | CHRNA4  | Cholinergic Receptor Nicotinic Alpha 4 Subunit        | Protein | 0.6 | 1.79 | 82.9 |
| 130 | TYR     | Tyrosinase                                            | Protein | 0.6 | 1.79 | 50.7 |
| 131 | PPARG   | Peroxisome Proliferator Activated Receptor Gamma      | Protein | 0.6 | 1.79 | 58.4 |
| 132 | JUN     | Jun Proto-Oncogene, AP-1 Transcription Factor Subunit | Protein | 0.6 | 1.79 | 79.9 |
| 133 | HTR6    | 5-Hydroxytryptamine Receptor 6                        | Protein | 0.6 | 1.79 | 70.3 |
| 134 | PPARA   | Peroxisome Proliferator Activated Receptor Alpha      | Protein | 0.6 | 1.79 | 37   |
| 135 | P4HB    | Prolyl 4-Hydroxylase Subunit Beta                     | Protein | 0.6 | 1.79 | 76.3 |
| 136 | ALOX5   | Arachidonate 5-Lipoxygenase                           | Protein | 0.6 | 1.79 | 77.2 |
| 137 | HTR2C   | 5-Hydroxytryptamine Receptor 2C                       | Protein | 0.6 | 1.79 | 33.3 |
| 138 | HSPA5   | Heat Shock Protein Family A (Hsp70) Member 5          | Protein | 0.6 | 1.79 | 81.7 |
| 139 | NFKBIA  | NFKB Inhibitor Alpha                                  | Protein | 0.6 | 1.79 | 80.1 |

|     |          |                                                                   |         |      |         |      |
|-----|----------|-------------------------------------------------------------------|---------|------|---------|------|
| 140 | DRD1     | Dopamine Receptor D1                                              | Protein | 0.6  | 1.79    | 73.9 |
| 141 | SLC6A2   | Solute Carrier Family 6 Member 2                                  | Protein | 0.6  | 1.79    | 57.5 |
| 142 | BLVRB    | Biliverdin Reductase B                                            | Protein | 0.6  | 1.79    | 32.4 |
| 143 | CREB1    | CAMP Responsive Element Binding Protein 1                         | Protein | 0.6  | 1.79    | 63   |
| 144 | ADRB2    | Adrenoceptor Beta 2                                               | Protein | 0.6  | 1.79    | 41   |
| 145 | POR      | Cytochrome P450 Oxidoreductase                                    | Protein | 0.6  | 1.79 ND |      |
| 146 | GRIN1    | Glutamate Ionotropic Receptor NMDA Type Subunit 1                 | Protein | 0.6  | 1.79    | 95.9 |
| 147 | GRIN2B   | Glutamate Ionotropic Receptor NMDA Type Subunit 2B                | Protein | 0.6  | 1.79    | 87.2 |
| 148 | DRD4     | Dopamine Receptor D4                                              | Protein | 0.6  | 1.79 ND |      |
| 149 | CYP19A1  | Cytochrome P450 Family 19 Subfamily A Member 1                    | Protein | 0.57 | 1.52    | 49.3 |
| 150 | KCNC1    | Potassium Voltage-Gated Channel Subfamily C Member 1              | Protein | 0.57 | 1.52    | 89.6 |
| 151 | GPX1     | Glutathione Peroxidase 1                                          | Protein | 0.49 | 1.51    | 29.7 |
| 152 | KCNQ2    | Potassium Voltage-Gated Channel Subfamily Q Member 2              | Protein | 0.49 | 1.51    | 70.8 |
| 153 | GSTM3    | Glutathione S-Transferase Mu 3                                    | Protein | 0.49 | 1.51    | 41.3 |
| 154 | SCN8A    | Sodium Voltage-Gated Channel Alpha Subunit 8                      | Protein | 0.49 | 1.51    | 80   |
| 155 | MTRR     | 5-Methyltetrahydrofolate-Homocysteine Methyltransferase Reductase | Protein | 0.4  | 1.51    | 21.3 |
| 156 | HDAC2    | Histone Deacetylase 2                                             | Protein | 0.4  | 1.51    | 50   |
| 157 | GPX4     | Glutathione Peroxidase 4                                          | Protein | 0.28 | 1.47 ND |      |
| 158 | HTR3A    | 5-Hydroxytryptamine Receptor 3A                                   | Protein | 0.28 | 1.47    | 58.6 |
| 159 | CAT      | Catalase                                                          | Protein | 0.28 | 1.47    | 66.8 |
| 160 | SLC23A2  | Solute Carrier Family 23 Member 2                                 | Protein | 0.28 | 1.47    | 85.8 |
| 161 | NPPA     | Natriuretic Peptide A                                             | Protein | 0.28 | 1.47    | 21.3 |
| 162 | SERPINE1 | Serpin Family E Member 1                                          | Protein | 0.28 | 1.47    | 47.4 |
| 163 | TXNRD1   | Thioredoxin Reductase 1                                           | Protein | 0.28 | 1.47    | 69   |
| 164 | SLC23A1  | Solute Carrier Family 23 Member 1                                 | Protein | 0.28 | 1.47    | 43.3 |
| 165 | PGRMC1   | Progesterone Receptor Membrane Component 1                        | Protein | 0.28 | 1.47    | 58.2 |
| 166 | IFNG     | Interferon Gamma                                                  | Protein | 0.28 | 1.47    | 81   |
| 167 | ASRGL1   | Asparaginase And Isoaspartyl Peptidase 1                          | Protein | 0.28 | 1.47    | 64.4 |
| 168 | SST      | Somatostatin                                                      | Protein | 0.28 | 1.47    | 51.1 |
| 169 | TUBA4A   | Tubulin Alpha 4a                                                  | Protein | 0.28 | 1.47    | 92.8 |
| 170 | GAMT     | Guanidinoacetate N-Methyltransferase                              | Protein | 0.28 | 1.47    | 48.2 |

<Banhasasim-tang target list>

| #  | Symbol  | Description (Query "mild cognitive impairment")     | Type    | Score | -Log10(p) | Average Disease Causing Likelihood |
|----|---------|-----------------------------------------------------|---------|-------|-----------|------------------------------------|
| 1  | BACE1   | Beta-Secretase 1                                    | Protein | 14.05 | 3.76      | 78.7                               |
| 2  | BCHE    | Butyrylcholinesterase                               | Protein | 11.7  | 3.59      | 18                                 |
| 3  | WARS2   | Tryptophanyl TRNA Synthetase 2, Mitochondrial       | Protein | 11.23 | 3.54      | 30.3                               |
| 4  | ACHE    | Acetylcholinesterase (Cartwright Blood Group)       | Protein | 9.93  | 3.14      | 43.9                               |
| 5  | IL1B    | Interleukin 1 Beta                                  | Protein | 9.64  | 3.11      | 81.8                               |
| 6  | ADRA2B  | Adrenoceptor Alpha 2B                               | Protein | 8.77  | 2.96      | 49.7                               |
| 7  | ABCA7   | ATP Binding Cassette Subfamily A Member 7           | Protein | 8.36  | 2.94      | 2                                  |
| 8  | DLG4    | Discs Large MAGUK Scaffold Protein 4                | Protein | 7.99  | 2.91      | 82.8                               |
| 9  | SLC6A3  | Solute Carrier Family 6 Member 3                    | Protein | 7.28  | 2.89      | 84.9                               |
| 10 | INS     | Insulin                                             | Protein | 6.89  | 2.87      | 74.5                               |
| 11 | TNF     | Tumor Necrosis Factor                               | Protein | 6.53  | 2.82      | 70.4                               |
| 12 | NOS3    | Nitric Oxide Synthase 3                             | Protein | 5.56  | 2.74      | 58.5                               |
| 13 | MTHFR   | Methylenetetrahydrofolate Reductase                 | Protein | 4.92  | 2.71      | 22.2                               |
| 14 | COMT    | Catechol-O-Methyltransferase                        | Protein | 4.59  | 2.68      | 11.8                               |
| 15 | ACE     | Angiotensin I Converting Enzyme                     | Protein | 4.59  | 2.68      | 15.8                               |
| 16 | TP53    | Tumor Protein P53                                   | Protein | 4.15  | 2.65      | 72.8                               |
| 17 | CHRNA7  | Cholinergic Receptor Nicotinic Alpha 7 Subunit      | Protein | 3.84  | 2.61      | 58.3                               |
| 18 | BCL2    | BCL2 Apoptosis Regulator                            | Protein | 3.64  | 2.57      | 48.6                               |
| 19 | DRD2    | Dopamine Receptor D2                                | Protein | 3.62  | 2.56      | 63.3                               |
| 20 | HTR2A   | 5-Hydroxytryptamine Receptor 2A                     | Protein | 3.5   | 2.54      | 62.1                               |
| 21 | MAOB    | Monoamine Oxidase B                                 | Protein | 3.42  | 2.52      | 84.5                               |
| 22 | ESR1    | Estrogen Receptor 1                                 | Protein | 3.38  | 2.52      | 68.5                               |
| 23 | BLVRA   | Biliverdin Reductase A                              | Protein | 3.19  | 2.47      | 39.8                               |
| 24 | VDR     | Vitamin D Receptor                                  | Protein | 3.12  | 2.44      | 64.2                               |
| 25 | ADORA2A | Adenosine A2a Receptor                              | Protein | 3.08  | 2.44      | 64.8                               |
| 26 | DRD3    | Dopamine Receptor D3                                | Protein | 3.08  | 2.44      | 60.2                               |
| 27 | HMGCR   | 3-Hydroxy-3-Methylglutaryl-CoA Reductase            | Protein | 2.97  | 2.4       | 83.1                               |
| 28 | MPO     | Myeloperoxidase                                     | Protein | 2.91  | 2.4       | 33.8                               |
| 29 | AIFM1   | Apoptosis Inducing Factor Mitochondria Associated 1 | Protein | 2.91  | 2.4       | 72.5                               |
| 30 | ITPR1   | Inositol 1,4,5-Trisphosphate Receptor Type 1        | Protein | 2.91  | 2.4       | 73.5                               |
| 31 | PIK3R1  | Phosphoinositide-3-Kinase Regulatory Subunit 1      | Protein | 2.91  | 2.4       | 54.4                               |
| 32 | SCN4A   | Sodium Voltage-Gated Channel Alpha Subunit 4        | Protein | 2.91  | 2.4       | 43.3                               |

|    |          |                                                        |         |      |         |      |
|----|----------|--------------------------------------------------------|---------|------|---------|------|
| 33 | ABCB1    | ATP Binding Cassette Subfamily B Member 1              | Protein | 2.49 | 2.22    | 58   |
| 34 | RAB7A    | RAB7A, Member RAS Oncogene Family                      | Protein | 2.49 | 2.22    | 82   |
| 35 | SIGMAR1  | Sigma Non-Opioid Intracellular Receptor 1              | Protein | 2.49 | 2.22    | 36.3 |
| 36 | DRD5     | Dopamine Receptor D5                                   | Protein | 2.49 | 2.22    | 34.6 |
| 37 | SLC6A4   | Solute Carrier Family 6 Member 4                       | Protein | 2.47 | 2.19    | 73   |
| 38 | ABCA1    | ATP Binding Cassette Subfamily A Member 1              | Protein | 2.47 | 2.19    | 51.7 |
| 39 | ESR2     | Estrogen Receptor 2                                    | Protein | 2.47 | 2.19    | 54.1 |
| 40 | GSTO1    | Glutathione S-Transferase Omega 1                      | Protein | 2.47 | 2.19    | 17.7 |
| 41 | ALB      | Albumin                                                | Protein | 2.47 | 2.19    | 82.3 |
| 42 | PTGS2    | Prostaglandin-Endoperoxide Synthase 2                  | Protein | 2.47 | 2.19    | 66.5 |
| 43 | ALDH2    | Aldehyde Dehydrogenase 2 Family Member                 | Protein | 2.35 | 2.16    | 51.1 |
| 44 | GRIN2A   | Glutamate Ionotropic Receptor NMDA Type Subunit 2A     | Protein | 2.35 | 2.16    | 78.3 |
| 45 | MAPK1    | Mitogen-Activated Protein Kinase 1                     | Protein | 2.35 | 2.16    | 73.8 |
| 46 | GLUL     | Glutamate-Ammonia Ligase                               | Protein | 2.35 | 2.16    | 87.5 |
| 47 | OPRM1    | Opioid Receptor Mu 1                                   | Protein | 2.35 | 2.16    | 7.8  |
| 48 | MMP9     | Matrix Metalloproteinase 9                             | Protein | 2.22 | 2.13    | 20.3 |
| 49 | VCAM1    | Vascular Cell Adhesion Molecule 1                      | Protein | 1.87 | 2.09    | 53.5 |
| 50 | DAO      | D-Amino Acid Oxidase                                   | Protein | 1.87 | 2.09    | 51   |
| 51 | CBS      | Cystathionine Beta-Synthase                            | Protein | 1.85 | 2.05    | 54.7 |
| 52 | DBH      | Dopamine Beta-Hydroxylase                              | Protein | 1.77 | 2.05    | 16.1 |
| 53 | GPX3     | Glutathione Peroxidase 3                               | Protein | 1.76 | 2.04    | 74.2 |
| 54 | PKM      | Pyruvate Kinase M1/2                                   | Protein | 1.76 | 2.04    | 82   |
| 55 | PLG      | Plasminogen                                            | Protein | 1.76 | 2.04    | 38.2 |
| 56 | ACO2     | Aconitase 2                                            | Protein | 1.76 | 2.04    | 80.9 |
| 57 | CXCL8    | C-X-C Motif Chemokine Ligand 8                         | Protein | 1.76 | 2.04    | 70.1 |
| 58 | PRKAA1   | Protein Kinase AMP-Activated Catalytic Subunit Alpha 1 | Protein | 1.76 | 2.04    | 83.4 |
| 59 | OPRK1    | Opioid Receptor Kappa 1                                | Protein | 1.76 | 2.04    | 72.1 |
| 60 | CYBB     | Cytochrome B-245 Beta Chain                            | Protein | 1.76 | 2.04    | 71.2 |
| 61 | SLC25A20 | Solute Carrier Family 25 Member 20                     | Protein | 1.76 | 2.04    | 70.3 |
| 62 | NCF1     | Neutrophil Cytosolic Factor 1                          | Protein | 1.76 | 2.04 ND |      |
| 63 | TH       | Tyrosine Hydroxylase                                   | Protein | 1.45 | 1.94    | 22.6 |
| 64 | PARK7    | Parkinsonism Associated Deglycase                      | Protein | 1.45 | 1.94    | 54   |
| 65 | CACNA1A  | Calcium Voltage-Gated Channel Subunit Alpha1 A         | Protein | 1.2  | 1.92    | 51.4 |
| 66 | HTR1A    | 5-Hydroxytryptamine Receptor 1A                        | Protein | 1.13 | 1.91    | 56.9 |
| 67 | NOS2     | Nitric Oxide Synthase 2                                | Protein | 1    | 1.9     | 46.6 |

|     |        |                                                                        |         |      |         |      |
|-----|--------|------------------------------------------------------------------------|---------|------|---------|------|
| 68  | RAC1   | Rac Family Small GTPase 1                                              | Protein | 1    | 1.9     | 78.2 |
| 69  | TLR4   | Toll Like Receptor 4                                                   | Protein | 1    | 1.9     | 25.4 |
| 70  | MTR    | 5-Methyltetrahydrofolate-Homocysteine Methyltransferase                | Protein | 1    | 1.9     | 44.6 |
| 71  | GRK2   | G Protein-Coupled Receptor Kinase 2                                    | Protein | 1    | 1.9     | 87.9 |
| 72  | CNR1   | Cannabinoid Receptor 1                                                 | Protein | 0.88 | 1.88    | 87.5 |
| 73  | PDE4A  | Phosphodiesterase 4A                                                   | Protein | 0.88 | 1.88    | 57.4 |
| 74  | NOS1   | Nitric Oxide Synthase 1                                                | Protein | 0.88 | 1.88    | 50.6 |
| 75  | GRIA2  | Glutamate Ionotropic Receptor AMPA Type Subunit 2                      | Protein | 0.88 | 1.88    | 84.2 |
| 76  | GSR    | Glutathione-Disulfide Reductase                                        | Protein | 0.88 | 1.88    | 31.7 |
| 77  | SRR    | Serine Racemase                                                        | Protein | 0.88 | 1.88    | 86.3 |
| 78  | APLP1  | Amyloid Beta Precursor Like Protein 1                                  | Protein | 0.88 | 1.88    | 71.1 |
| 79  | GLRX   | Glutaredoxin                                                           | Protein | 0.88 | 1.88    | 67.2 |
| 80  | VDAC1  | Voltage Dependent Anion Channel 1                                      | Protein | 0.88 | 1.88    | 80.1 |
| 81  | SLC1A3 | Solute Carrier Family 1 Member 3                                       | Protein | 0.85 | 1.84    | 58   |
| 82  | TUBA1A | Tubulin Alpha 1a                                                       | Protein | 0.85 | 1.84 ND |      |
| 83  | MAOA   | Monoamine Oxidase A                                                    | Protein | 0.85 | 1.84    | 84.1 |
| 84  | CHRM1  | Cholinergic Receptor Muscarinic 1                                      | Protein | 0.85 | 1.84    | 87.1 |
| 85  | DNMT1  | DNA Methyltransferase 1                                                | Protein | 0.85 | 1.84    | 73.2 |
| 86  | AKT1   | AKT Serine/Threonine Kinase 1                                          | Protein | 0.85 | 1.84    | 90.8 |
| 87  | AFG3L2 | AFG3 Like Matrix AAA Peptidase Subunit 2                               | Protein | 0.85 | 1.84    | 86.3 |
| 88  | MAT1A  | Methionine Adenosyltransferase 1A                                      | Protein | 0.63 | 1.81    | 84.3 |
| 89  | NCF2   | Neutrophil Cytosolic Factor 2                                          | Protein | 0.6  | 1.79    | 13.9 |
| 90  | PIK3CD | Phosphatidylinositol-4,5-Bisphosphate 3-Kinase Catalytic Subunit Delta | Protein | 0.6  | 1.79    | 70.8 |
| 91  | ATM    | ATM Serine/Threonine Kinase                                            | Protein | 0.6  | 1.79    | 30.3 |
| 92  | HRH1   | Histamine Receptor H1                                                  | Protein | 0.6  | 1.79    | 43.3 |
| 93  | AOC3   | Amine Oxidase Copper Containing 3                                      | Protein | 0.6  | 1.79    | 19.4 |
| 94  | HPRT1  | Hypoxanthine Phosphoribosyltransferase 1                               | Protein | 0.6  | 1.79    | 77.5 |
| 95  | SUCLG1 | Succinate-CoA Ligase GDP/ADP-Forming Subunit Alpha                     | Protein | 0.6  | 1.79    | 57.2 |
| 96  | CHRNA4 | Cholinergic Receptor Nicotinic Alpha 4 Subunit                         | Protein | 0.6  | 1.79    | 82.9 |
| 97  | SUCLA2 | Succinate-CoA Ligase ADP-Forming Subunit Beta                          | Protein | 0.6  | 1.79    | 34   |
| 98  | GRIA1  | Glutamate Ionotropic Receptor AMPA Type Subunit 1                      | Protein | 0.6  | 1.79    | 61.3 |
| 99  | MTNR1A | Melatonin Receptor 1A                                                  | Protein | 0.6  | 1.79    | 41.6 |
| 100 | PPARA  | Peroxisome Proliferator Activated Receptor Alpha                       | Protein | 0.6  | 1.79    | 37   |
| 101 | GSTM1  | Glutathione S-Transferase Mu 1                                         | Protein | 0.6  | 1.79 ND |      |
| 102 | CHRNB2 | Cholinergic Receptor Nicotinic Beta 2 Subunit                          | Protein | 0.6  | 1.79    | 84.8 |

|     |         |                                                       |         |     |         |      |
|-----|---------|-------------------------------------------------------|---------|-----|---------|------|
| 103 | GLO1    | Glyoxalase I                                          | Protein | 0.6 | 1.79    | 42.6 |
| 104 | HSPA5   | Heat Shock Protein Family A (Hsp70) Member 5          | Protein | 0.6 | 1.79    | 81.7 |
| 105 | ITGB2   | Integrin Subunit Beta 2                               | Protein | 0.6 | 1.79    | 71.5 |
| 106 | POR     | Cytochrome P450 Oxidoreductase                        | Protein | 0.6 | 1.79 ND |      |
| 107 | NFKBIA  | NFKB Inhibitor Alpha                                  | Protein | 0.6 | 1.79    | 80.1 |
| 108 | GRIA3   | Glutamate Ionotropic Receptor AMPA Type Subunit 3     | Protein | 0.6 | 1.79    | 90   |
| 109 | VLDLR   | Very Low Density Lipoprotein Receptor                 | Protein | 0.6 | 1.79    | 60.6 |
| 110 | GRB2    | Growth Factor Receptor Bound Protein 2                | Protein | 0.6 | 1.79    | 81.1 |
| 111 | HTR3D   | 5-Hydroxytryptamine Receptor 3D                       | Protein | 0.6 | 1.79    | 11.2 |
| 112 | CASP9   | Caspase 9                                             | Protein | 0.6 | 1.79    | 26.4 |
| 113 | PRKCB   | Protein Kinase C Beta                                 | Protein | 0.6 | 1.79    | 87.4 |
| 114 | ABL1    | ABL Proto-Oncogene 1, Non-Receptor Tyrosine Kinase    | Protein | 0.6 | 1.79    | 74.1 |
| 115 | SLC1A2  | Solute Carrier Family 1 Member 2                      | Protein | 0.6 | 1.79    | 85   |
| 116 | DRD1    | Dopamine Receptor D1                                  | Protein | 0.6 | 1.79    | 73.9 |
| 117 | GRIN1   | Glutamate Ionotropic Receptor NMDA Type Subunit 1     | Protein | 0.6 | 1.79    | 95.9 |
| 118 | GSTP1   | Glutathione S-Transferase Pi 1                        | Protein | 0.6 | 1.79    | 33.1 |
| 119 | JUN     | Jun Proto-Oncogene, AP-1 Transcription Factor Subunit | Protein | 0.6 | 1.79    | 79.9 |
| 120 | PTGS1   | Prostaglandin-Endoperoxide Synthase 1                 | Protein | 0.6 | 1.79    | 25.3 |
| 121 | PPIG    | Peptidylprolyl Isomerase G                            | Protein | 0.6 | 1.79    | 47.6 |
| 122 | GRIN2B  | Glutamate Ionotropic Receptor NMDA Type Subunit 2B    | Protein | 0.6 | 1.79    | 87.2 |
| 123 | KCNC3   | Potassium Voltage-Gated Channel Subfamily C Member 3  | Protein | 0.6 | 1.79    | 67.5 |
| 124 | PPARG   | Peroxisome Proliferator Activated Receptor Gamma      | Protein | 0.6 | 1.79    | 58.4 |
| 125 | ADORA1  | Adenosine A1 Receptor                                 | Protein | 0.6 | 1.79    | 79   |
| 126 | PLD2    | Phospholipase D2                                      | Protein | 0.6 | 1.79    | 11.5 |
| 127 | TPH1    | Tryptophan Hydroxylase 1                              | Protein | 0.6 | 1.79    | 54.7 |
| 128 | DRD4    | Dopamine Receptor D4                                  | Protein | 0.6 | 1.79 ND |      |
| 129 | PGR     | Progesterone Receptor                                 | Protein | 0.6 | 1.79    | 37.9 |
| 130 | ALDH5A1 | Aldehyde Dehydrogenase 5 Family Member A1             | Protein | 0.6 | 1.79    | 22.2 |
| 131 | CREB1   | CAMP Responsive Element Binding Protein 1             | Protein | 0.6 | 1.79    | 63   |
| 132 | P4HB    | Prolyl 4-Hydroxylase Subunit Beta                     | Protein | 0.6 | 1.79    | 76.3 |
| 133 | TYR     | Tyrosinase                                            | Protein | 0.6 | 1.79    | 50.7 |
| 134 | SLC6A2  | Solute Carrier Family 6 Member 2                      | Protein | 0.6 | 1.79    | 57.5 |
| 135 | ALOX5   | Arachidonate 5-Lipoxygenase                           | Protein | 0.6 | 1.79    | 77.2 |
| 136 | CXCR4   | C-X-C Motif Chemokine Receptor 4                      | Protein | 0.6 | 1.79    | 78.3 |
| 137 | PAWR    | Pro-Apoptotic WT1 Regulator                           | Protein | 0.6 | 1.79    | 33.9 |



|     |          |                                                                   |         |      |         |      |
|-----|----------|-------------------------------------------------------------------|---------|------|---------|------|
| 138 | CNR2     | Cannabinoid Receptor 2                                            | Protein | 0.6  | 1.79    | 60.7 |
| 139 | NQO1     | NAD(P)H Quinone Dehydrogenase 1                                   | Protein | 0.6  | 1.79    | 14.7 |
| 140 | PRKCA    | Protein Kinase C Alpha                                            | Protein | 0.6  | 1.79    | 89.4 |
| 141 | FXN      | Frataxin                                                          | Protein | 0.6  | 1.79    | 57.3 |
| 142 | SOAT1    | Sterol O-Acyltransferase 1                                        | Protein | 0.6  | 1.79    | 48.2 |
| 143 | CHRM2    | Cholinergic Receptor Muscarinic 2                                 | Protein | 0.6  | 1.79    | 63.1 |
| 144 | COX5A    | Cytochrome C Oxidase Subunit 5A                                   | Protein | 0.6  | 1.79    | 78.9 |
| 145 | HTR2C    | 5-Hydroxytryptamine Receptor 2C                                   | Protein | 0.6  | 1.79    | 33.3 |
| 146 | OGDH     | Oxoglutarate Dehydrogenase                                        | Protein | 0.6  | 1.79    | 68.5 |
| 147 | ADRB2    | Adrenoceptor Beta 2                                               | Protein | 0.6  | 1.79    | 41   |
| 148 | LDLR     | Low Density Lipoprotein Receptor                                  | Protein | 0.6  | 1.79    | 58   |
| 149 | KCNC1    | Potassium Voltage-Gated Channel Subfamily C Member 1              | Protein | 0.57 | 1.52    | 89.6 |
| 150 | CYP19A1  | Cytochrome P450 Family 19 Subfamily A Member 1                    | Protein | 0.57 | 1.52    | 49.3 |
| 151 | GPX1     | Glutathione Peroxidase 1                                          | Protein | 0.49 | 1.51    | 29.7 |
| 152 | KCNQ2    | Potassium Voltage-Gated Channel Subfamily Q Member 2              | Protein | 0.49 | 1.51    | 70.8 |
| 153 | SCN8A    | Sodium Voltage-Gated Channel Alpha Subunit 8                      | Protein | 0.49 | 1.51    | 80   |
| 154 | GSTM3    | Glutathione S-Transferase Mu 3                                    | Protein | 0.49 | 1.51    | 41.3 |
| 155 | MTRR     | 5-Methyltetrahydrofolate-Homocysteine Methyltransferase Reductase | Protein | 0.4  | 1.51    | 21.3 |
| 156 | SLC16A4  | Solute Carrier Family 16 Member 4                                 | Protein | 0.4  | 1.51    | 55.3 |
| 157 | MMP2     | Matrix Metalloproteinase 2                                        | Protein | 0.4  | 1.51    | 71.8 |
| 158 | HDAC2    | Histone Deacetylase 2                                             | Protein | 0.4  | 1.51    | 50   |
| 159 | PGRMC1   | Progesterone Receptor Membrane Component 1                        | Protein | 0.28 | 1.47    | 58.2 |
| 160 | ASRGL1   | Asparaginase And Isoaspartyl Peptidase 1                          | Protein | 0.28 | 1.47    | 64.4 |
| 161 | CAT      | Catalase                                                          | Protein | 0.28 | 1.47    | 66.8 |
| 162 | TXNRD1   | Thioredoxin Reductase 1                                           | Protein | 0.28 | 1.47    | 69   |
| 163 | GAMT     | Guanidinoacetate N-Methyltransferase                              | Protein | 0.28 | 1.47    | 48.2 |
| 164 | PLPBP    | Pyridoxal Phosphate Binding Protein                               | Protein | 0.28 | 1.47    | 63.2 |
| 165 | SERPINE1 | Serpin Family E Member 1                                          | Protein | 0.28 | 1.47    | 47.4 |
| 166 | NPPA     | Natriuretic Peptide A                                             | Protein | 0.28 | 1.47    | 21.3 |
| 167 | TUBA4A   | Tubulin Alpha 4a                                                  | Protein | 0.28 | 1.47    | 92.8 |
| 168 | IFNG     | Interferon Gamma                                                  | Protein | 0.28 | 1.47    | 81   |
| 169 | HTR3A    | 5-Hydroxytryptamine Receptor 3A                                   | Protein | 0.28 | 1.47    | 58.6 |
| 170 | GPX4     | Glutathione Peroxidase 4                                          | Protein | 0.28 | 1.47 ND |      |

<YMJ target list>

| #  | Symbol  | Description (Query "mild cognitive impairment")    | Type    | Score | -Log10(p) | Average Disease Causing Likelihood |
|----|---------|----------------------------------------------------|---------|-------|-----------|------------------------------------|
| 1  | MAPT    | Microtubule Associated Protein Tau                 | Protein | 19.5  | 4.06      | 14.1                               |
| 2  | BCHE    | Butyrylcholinesterase                              | Protein | 11.7  | 3.59      | 18                                 |
| 3  | ACHE    | Acetylcholinesterase (Cartwright Blood Group)      | Protein | 9.93  | 3.14      | 43.9                               |
| 4  | ADRA2B  | Adrenoceptor Alpha 2B                              | Protein | 8.77  | 2.96      | 49.7                               |
| 5  | DLG4    | Discs Large MAGUK Scaffold Protein 4               | Protein | 7.99  | 2.91      | 82.8                               |
| 6  | SLC6A3  | Solute Carrier Family 6 Member 3                   | Protein | 7.28  | 2.89      | 84.9                               |
| 7  | INS     | Insulin                                            | Protein | 6.89  | 2.87      | 74.5                               |
| 8  | TNF     | Tumor Necrosis Factor                              | Protein | 6.53  | 2.82      | 70.4                               |
| 9  | COMT    | Catechol-O-Methyltransferase                       | Protein | 4.59  | 2.68      | 11.8                               |
| 10 | ACE     | Angiotensin I Converting Enzyme                    | Protein | 4.59  | 2.68      | 15.8                               |
| 11 | CHRNA7  | Cholinergic Receptor Nicotinic Alpha 7 Subunit     | Protein | 3.84  | 2.61      | 58.3                               |
| 12 | BCL2    | BCL2 Apoptosis Regulator                           | Protein | 3.64  | 2.57      | 48.6                               |
| 13 | DNMT3A  | DNA Methyltransferase 3 Alpha                      | Protein | 3.64  | 2.57      | 86.7                               |
| 14 | DRD2    | Dopamine Receptor D2                               | Protein | 3.62  | 2.56      | 63.3                               |
| 15 | HTR2A   | 5-Hydroxytryptamine Receptor 2A                    | Protein | 3.5   | 2.54      | 62.1                               |
| 16 | ESR1    | Estrogen Receptor 1                                | Protein | 3.38  | 2.52      | 68.5                               |
| 17 | VDR     | Vitamin D Receptor                                 | Protein | 3.12  | 2.44      | 64.2                               |
| 18 | ADORA2A | Adenosine A2a Receptor                             | Protein | 3.08  | 2.44      | 64.8                               |
| 19 | DRD3    | Dopamine Receptor D3                               | Protein | 3.08  | 2.44      | 60.2                               |
| 20 | HMGCR   | 3-Hydroxy-3-Methylglutaryl-CoA Reductase           | Protein | 2.97  | 2.4       | 83.1                               |
| 21 | ITPR1   | Inositol 1,4,5-Trisphosphate Receptor Type 1       | Protein | 2.91  | 2.4       | 73.5                               |
| 22 | SCN4A   | Sodium Voltage-Gated Channel Alpha Subunit 4       | Protein | 2.91  | 2.4       | 43.3                               |
| 23 | PIK3R1  | Phosphoinositide-3-Kinase Regulatory Subunit 1     | Protein | 2.91  | 2.4       | 54.4                               |
| 24 | RAB7A   | RAB7A, Member RAS Oncogene Family                  | Protein | 2.49  | 2.22      | 82                                 |
| 25 | ABCB1   | ATP Binding Cassette Subfamily B Member 1          | Protein | 2.49  | 2.22      | 58                                 |
| 26 | DRD5    | Dopamine Receptor D5                               | Protein | 2.49  | 2.22      | 34.6                               |
| 27 | ESR2    | Estrogen Receptor 2                                | Protein | 2.47  | 2.19      | 54.1                               |
| 28 | SLC6A4  | Solute Carrier Family 6 Member 4                   | Protein | 2.47  | 2.19      | 73                                 |
| 29 | PTGS2   | Prostaglandin-Endoperoxide Synthase 2              | Protein | 2.47  | 2.19      | 66.5                               |
| 30 | ALB     | Albumin                                            | Protein | 2.47  | 2.19      | 82.3                               |
| 31 | ALDH2   | Aldehyde Dehydrogenase 2 Family Member             | Protein | 2.35  | 2.16      | 51.1                               |
| 32 | MAPK1   | Mitogen-Activated Protein Kinase 1                 | Protein | 2.35  | 2.16      | 73.8                               |
| 33 | OPRM1   | Opioid Receptor Mu 1                               | Protein | 2.35  | 2.16      | 7.8                                |
| 34 | GRIN2A  | Glutamate Ionotropic Receptor NMDA Type Subunit 2A | Protein | 2.35  | 2.16      | 78.3                               |

|    |         |                                                                        |         |      |         |      |
|----|---------|------------------------------------------------------------------------|---------|------|---------|------|
| 35 | VCAM1   | Vascular Cell Adhesion Molecule 1                                      | Protein | 1.87 | 2.09    | 53.5 |
| 36 | CBS     | Cystathionine Beta-Synthase                                            | Protein | 1.85 | 2.05    | 54.7 |
| 37 | DBH     | Dopamine Beta-Hydroxylase                                              | Protein | 1.77 | 2.05    | 16.1 |
| 38 | CHGA    | Chromogranin A                                                         | Protein | 1.76 | 2.04    | 15.2 |
| 39 | PLG     | Plasminogen                                                            | Protein | 1.76 | 2.04    | 38.2 |
| 40 | PRKAA1  | Protein Kinase AMP-Activated Catalytic Subunit Alpha 1                 | Protein | 1.76 | 2.04    | 83.4 |
| 41 | OPRK1   | Opioid Receptor Kappa 1                                                | Protein | 1.76 | 2.04    | 72.1 |
| 42 | MAP2    | Microtubule Associated Protein 2                                       | Protein | 1.45 | 1.94    | 67.5 |
| 43 | HTR1A   | 5-Hydroxytryptamine Receptor 1A                                        | Protein | 1.13 | 1.91    | 56.9 |
| 44 | APLP1   | Amyloid Beta Precursor Like Protein 1                                  | Protein | 0.88 | 1.88    | 71.1 |
| 45 | CNR1    | Cannabinoid Receptor 1                                                 | Protein | 0.88 | 1.88    | 87.5 |
| 46 | PDE4A   | Phosphodiesterase 4A                                                   | Protein | 0.88 | 1.88    | 57.4 |
| 47 | GRIA2   | Glutamate Ionotropic Receptor AMPA Type Subunit 2                      | Protein | 0.88 | 1.88    | 84.2 |
| 48 | CHRM1   | Cholinergic Receptor Muscarinic 1                                      | Protein | 0.85 | 1.84    | 87.1 |
| 49 | MAT1A   | Methionine Adenosyltransferase 1A                                      | Protein | 0.63 | 1.81    | 84.3 |
| 50 | DRD4    | Dopamine Receptor D4                                                   | Protein | 0.6  | 1.79 ND |      |
| 51 | SLC6A2  | Solute Carrier Family 6 Member 2                                       | Protein | 0.6  | 1.79    | 57.5 |
| 52 | PIK3CD  | Phosphatidylinositol-4,5-Bisphosphate 3-Kinase Catalytic Subunit Delta | Protein | 0.6  | 1.79    | 70.8 |
| 53 | ITGB2   | Integrin Subunit Beta 2                                                | Protein | 0.6  | 1.79    | 71.5 |
| 54 | HPRT1   | Hypoxanthine Phosphoribosyltransferase 1                               | Protein | 0.6  | 1.79    | 77.5 |
| 55 | ALDH5A1 | Aldehyde Dehydrogenase 5 Family Member A1                              | Protein | 0.6  | 1.79    | 22.2 |
| 56 | CXCR4   | C-X-C Motif Chemokine Receptor 4                                       | Protein | 0.6  | 1.79    | 78.3 |
| 57 | OGDH    | Oxoglutarate Dehydrogenase                                             | Protein | 0.6  | 1.79    | 68.5 |
| 58 | DRD1    | Dopamine Receptor D1                                                   | Protein | 0.6  | 1.79    | 73.9 |
| 59 | CREB1   | CAMP Responsive Element Binding Protein 1                              | Protein | 0.6  | 1.79    | 63   |
| 60 | HTR6    | 5-Hydroxytryptamine Receptor 6                                         | Protein | 0.6  | 1.79    | 70.3 |
| 61 | COX5A   | Cytochrome C Oxidase Subunit 5A                                        | Protein | 0.6  | 1.79    | 78.9 |
| 62 | PLD2    | Phospholipase D2                                                       | Protein | 0.6  | 1.79    | 11.5 |
| 63 | ATM     | ATM Serine/Threonine Kinase                                            | Protein | 0.6  | 1.79    | 30.3 |
| 64 | PRKCB   | Protein Kinase C Beta                                                  | Protein | 0.6  | 1.79    | 87.4 |
| 65 | PTGS1   | Prostaglandin-Endoperoxide Synthase 1                                  | Protein | 0.6  | 1.79    | 25.3 |
| 66 | ADORA1  | Adenosine A1 Receptor                                                  | Protein | 0.6  | 1.79    | 79   |
| 67 | TYR     | Tyrosinase                                                             | Protein | 0.6  | 1.79    | 50.7 |
| 68 | GRIN1   | Glutamate Ionotropic Receptor NMDA Type Subunit 1                      | Protein | 0.6  | 1.79    | 95.9 |
| 69 | GRIN2B  | Glutamate Ionotropic Receptor NMDA Type Subunit 2B                     | Protein | 0.6  | 1.79    | 87.2 |
| 70 | CHRNA4  | Cholinergic Receptor Nicotinic Alpha 4 Subunit                         | Protein | 0.6  | 1.79    | 82.9 |
| 71 | ADRB2   | Adrenoceptor Beta 2                                                    | Protein | 0.6  | 1.79    | 41   |

|    |          |                                                      |         |      |      |      |
|----|----------|------------------------------------------------------|---------|------|------|------|
| 72 | ALOX5    | Arachidonate 5-Lipoxygenase                          | Protein | 0.6  | 1.79 | 77.2 |
| 73 | CNR2     | Cannabinoid Receptor 2                               | Protein | 0.6  | 1.79 | 60.7 |
| 74 | GRIA1    | Glutamate Ionotropic Receptor AMPA Type Subunit 1    | Protein | 0.6  | 1.79 | 61.3 |
| 75 | HTR3D    | 5-Hydroxytryptamine Receptor 3D                      | Protein | 0.6  | 1.79 | 11.2 |
| 76 | CHRN2    | Cholinergic Receptor Nicotinic Beta 2 Subunit        | Protein | 0.6  | 1.79 | 84.8 |
| 77 | GRIA3    | Glutamate Ionotropic Receptor AMPA Type Subunit 3    | Protein | 0.6  | 1.79 | 90   |
| 78 | AOC3     | Amine Oxidase Copper Containing 3                    | Protein | 0.6  | 1.79 | 19.4 |
| 79 | KCNC3    | Potassium Voltage-Gated Channel Subfamily C Member 3 | Protein | 0.6  | 1.79 | 67.5 |
| 80 | PRKCA    | Protein Kinase C Alpha                               | Protein | 0.6  | 1.79 | 89.4 |
| 81 | SOAT1    | Sterol O-Acyltransferase 1                           | Protein | 0.6  | 1.79 | 48.2 |
| 82 | PGR      | Progesterone Receptor                                | Protein | 0.6  | 1.79 | 37.9 |
| 83 | HRH1     | Histamine Receptor H1                                | Protein | 0.6  | 1.79 | 43.3 |
| 84 | CHRM2    | Cholinergic Receptor Muscarinic 2                    | Protein | 0.6  | 1.79 | 63.1 |
| 85 | HTR2C    | 5-Hydroxytryptamine Receptor 2C                      | Protein | 0.6  | 1.79 | 33.3 |
| 86 | CYP19A1  | Cytochrome P450 Family 19 Subfamily A Member 1       | Protein | 0.57 | 1.52 | 49.3 |
| 87 | KCNC1    | Potassium Voltage-Gated Channel Subfamily C Member 1 | Protein | 0.57 | 1.52 | 89.6 |
| 88 | SCN8A    | Sodium Voltage-Gated Channel Alpha Subunit 8         | Protein | 0.49 | 1.51 | 80   |
| 89 | HDAC2    | Histone Deacetylase 2                                | Protein | 0.4  | 1.51 | 50   |
| 90 | HTR3A    | 5-Hydroxytryptamine Receptor 3A                      | Protein | 0.28 | 1.47 | 58.6 |
| 91 | CAT      | Catalase                                             | Protein | 0.28 | 1.47 | 66.8 |
| 92 | SERPINE1 | Serpin Family E Member 1                             | Protein | 0.28 | 1.47 | 47.4 |
| 93 | TUBA4A   | Tubulin Alpha 4a                                     | Protein | 0.28 | 1.47 | 92.8 |
| 94 | GAMT     | Guanidinoacetate N-Methyltransferase                 | Protein | 0.28 | 1.47 | 48.2 |
| 95 | IFNG     | Interferon Gamma                                     | Protein | 0.28 | 1.47 | 81   |

**<Common target list>**

| <b>#</b> | <b>Symbol</b> |
|----------|---------------|
| 1        | BCHE          |
| 2        | ACHE          |
| 3        | ADRA2B        |
| 4        | DLG4          |
| 5        | SLC6A3        |
| 6        | INS           |
| 7        | TNF           |
| 8        | COMT          |
| 9        | ACE           |
| 10       | CHRNA7        |
| 11       | BCL2          |
| 12       | DRD2          |
| 13       | HTR2A         |
| 14       | ESR1          |
| 15       | VDR           |
| 16       | ADORA2A       |
| 17       | DRD3          |
| 18       | HMGCR         |
| 19       | ITPR1         |
| 20       | PIK3R1        |
| 21       | SCN4A         |
| 22       | ABCB1         |
| 23       | DRD5          |
| 24       | RAB7A         |
| 25       | PTGS2         |
| 26       | ALB           |
| 27       | ESR2          |
| 28       | SLC6A4        |
| 29       | GRIN2A        |
| 30       | OPRM1         |
| 31       | ALDH2         |
| 32       | VCAM1         |
| 33       | CBS           |
| 34       | DBH           |
| 35       | OPRK1         |
| 36       | PLG           |
| 37       | PRKAA1        |
| 38       | HTR1A         |
| 39       | GRIA2         |
| 40       | CNR1          |

41 PDE4A  
42 APLP1

## Supplementary 2

### <GGT Superpath>

| Score | Name                                                                   | # Matched Genes (Total Genes) |
|-------|------------------------------------------------------------------------|-------------------------------|
| 63.85 | SuperPath: Methylphenidate Pathway, Pharmacodynamics                   | 10 (18)                       |
| 50    | SuperPath: Neuroscience                                                | 17 (341)                      |
| 48.42 | SuperPath: Monoamine Transport                                         | 9 (33)                        |
| 43.51 | SuperPath: Interleukin-4 and Interleukin-13 Signaling                  | 11 (108)                      |
| 40    | SuperPath: Metabolism                                                  | 30 (2121)                     |
| 39.58 | SuperPath: Neurotransmitter Clearance                                  | 6 (10)                        |
| 37.8  | SuperPath: Transmission Across Chemical Synapses                       | 15 (410)                      |
| 37.46 | SuperPath: Immune Response IL-23 Signaling Pathway                     | 11 (160)                      |
| 35.95 | SuperPath: Development Dopamine D2 Receptor Transactivation of EGFR    | 10 (128)                      |
| 35.23 | SuperPath: Signal Transduction                                         | 31 (2590)                     |
| 33.81 | SuperPath: Alzheimer's Disease and MiRNA Effects                       | 12 (266)                      |
| 33.61 | SuperPath: Biogenic Amine Synthesis                                    | 6 (20)                        |
| 32.54 | SuperPath: Burn Wound Healing                                          | 8 (75)                        |
| 32.52 | SuperPath: Spinal Cord Injury                                          | 9 (115)                       |
| 32.24 | SuperPath: Insulin Receptor Recycling                                  | 8 (77)                        |
| 28.82 | SuperPath: IL-10 Pathway                                               | 6 (35)                        |
| 28.47 | SuperPath: Sudden Infant Death Syndrome (SIDS) Susceptibility Pathways | 9 (159)                       |
| 27.79 | SuperPath: MIF Mediated Glucocorticoid Regulation                      | 15 (681)                      |
| 27.28 | SuperPath: Nuclear Receptors Meta-pathway                              | 11 (315)                      |
| 27.07 | SuperPath: Monoamine GPCRs                                             | 6 (43)                        |
| 26.88 | SuperPath: NO/cGMP/PKG Mediated Neuroprotection                        | 6 (44)                        |
| 26.14 | SuperPath: Photodynamic Therapy-induced NF-kB Survival Signaling       | 6 (48)                        |
| 25.67 | SuperPath: Plasma Membrane Estrogen Receptor Signaling                 | 5 (24)                        |
| 25.58 | SuperPath: Neuroinflammation and Glutamatergic Signaling               | 8 (140)                       |
| 25.04 | SuperPath: Development VEGF Signaling Via VEGFR2 - Generic Cascades    | 8 (147)                       |
| 24.68 | SuperPath: ATF-2 Transcription Factor Network                          | 6 (57)                        |
| 24.57 | SuperPath: Doxorubicin Pathway, Pharmacokinetics                       | 5 (28)                        |

|                                                                                             |           |
|---------------------------------------------------------------------------------------------|-----------|
| 24.54 SuperPath: G-Beta Gamma Signaling                                                     | 9 (219)   |
| 24.16 SuperPath: Blood-Brain Barrier and Immune Cell Transmigration: VCAM-1/CD106 Signaling | 7 (104)   |
| 24.02 SuperPath: GPCR Downstream Signalling                                                 | 14 (710)  |
| 23.77 SuperPath: Colorectal Cancer Metastasis                                               | 8 (165)   |
| 23.71 SuperPath: Ferroptosis                                                                | 6 (64)    |
| 23.53 SuperPath: Sympathetic Nerve Pathway (Pre- and Post- Ganglionic Junction)             | 4 (12)    |
| 23.32 SuperPath: One-carbon Metabolism and Related Pathways                                 | 6 (67)    |
| 23.19 SuperPath: Methotrexate Pathway (Cancer Cell), Pharmacodynamics and Pharmacokinetics  | 5 (34)    |
| 23.18 SuperPath: Hepatocyte Growth Factor Receptor Signaling                                | 7 (115)   |
| 23.14 SuperPath: ADORA2B Mediated Anti-inflammatory Cytokines Production                    | 11 (419)  |
| 23.01 SuperPath: Signaling By Receptor Tyrosine Kinases                                     | 12 (524)  |
| 22.99 SuperPath: ACE Inhibitor Pathway, Pharmacodynamics                                    | 5 (35)    |
| 22.79 SuperPath: Amyotrophic Lateral Sclerosis (ALS)                                        | 5 (36)    |
| 22.79 SuperPath: Genetic Causes of Porto-sinusoidal Vascular Disease                        | 5 (36)    |
| 22.65 SuperPath: RXR and RAR Heterodimerization With Other Nuclear Receptor                 | 4 (14)    |
| 22.3 SuperPath: Ca, CAMP and Lipid Signaling                                                | 7 (126)   |
| 22.25 SuperPath: Etoposide Pathway, Pharmacokinetics/Pharmacodynamics                       | 4 (15)    |
| 21.9 SuperPath: Innate Immune System                                                        | 22 (2024) |
| 21.89 SuperPath: Ethanol Degradation II                                                     | 4 (16)    |
| 21.89 SuperPath: LDL Oxidation in Atherogenesis                                             | 4 (16)    |
| 21.64 SuperPath: Development Ligand-independent Activation of ESR1 and ESR2                 | 7 (135)   |
| 21.21 SuperPath: Tyrosine Metabolism P.1 (dopamine)                                         | 4 (18)    |
| 20.9 SuperPath: Overview of Nanoparticle Effects                                            | 4 (19)    |
| 20.9 SuperPath: Cellular Roles of Anthrax Toxin                                             | 4 (19)    |
| 20.84 SuperPath: PI3K-Akt Signaling Pathway                                                 | 10 (390)  |
| 20.76 SuperPath: MSP-RON Signaling                                                          | 5 (48)    |
| 20.69 SuperPath: Apoptotic Pathways in Synovial Fibroblasts                                 | 13 (731)  |
| 20.67 SuperPath: Amino Acid Metabolism                                                      | 6 (92)    |
| 20.58 SuperPath: Activation of NMDA Receptors and Postsynaptic Events                       | 6 (93)    |
| 20.47 SuperPath: IL-18 Signaling Pathway                                                    | 5 (50)    |
| 20.44 SuperPath: AMPK Enzyme Complex Pathway                                                | 7 (153)   |
| 20.33 SuperPath: Sildenafil Treatment                                                       | 4 (21)    |



|                                                                                       |          |
|---------------------------------------------------------------------------------------|----------|
| 20.27 SuperPath: Dopamine-DARPP32 Feedback Onto CAMP Pathway                          | 8 (228)  |
| 20.19 SuperPath: Phosphodiesterases in Neuronal Function                              | 5 (52)   |
| 20.07 SuperPath: Nitric Oxide Stimulates Guanylate Cyclase                            | 4 (22)   |
| 20.06 SuperPath: AMP-activated Protein Kinase Signaling                               | 6 (99)   |
| 19.89 SuperPath: Toll Comparative Pathway                                             | 6 (101)  |
| 19.67 SuperPath: Prostaglandin Synthesis and Regulation                               | 5 (56)   |
| 19.57 SuperPath: G-protein Signaling_Rac2 Regulation Pathway                          | 4 (24)   |
| 19.34 SuperPath: Pathogenesis of ALS                                                  | 4 (25)   |
| 19.34 SuperPath: Signaling By VEGF                                                    | 6 (108)  |
| 18.7 SuperPath: Apoptosis and Survival_Anti-apoptotic Action of Nuclear ESR1 and ESR2 | 4 (28)   |
| 18.54 SuperPath: Fragile X Syndrome                                                   | 6 (119)  |
| 18.31 SuperPath: N-cadherin Signaling Events                                          | 4 (30)   |
| 18.12 SuperPath: CAMKK2 Pathway                                                       | 4 (31)   |
| 18.03 SuperPath: Cytokine Signaling in Immune System                                  | 12 (730) |
| 18.01 SuperPath: Folate-alcohol and Cancer Pathway Hypotheses                         | 3 (9)    |
| 17.95 SuperPath: Nuclear Events Mediated By NFE2L2                                    | 7 (199)  |
| 17.91 SuperPath: Toll-like Receptor Signaling Pathway                                 | 8 (285)  |
| 17.77 SuperPath: Oxidative Stress Response                                            | 4 (33)   |
| 17.77 SuperPath: Signaling Mediated By P38-alpha and P38-beta                         | 4 (33)   |
| 17.69 SuperPath: GDNF Signaling                                                       | 6 (132)  |
| 17.6 SuperPath: Thromboxane A2 Receptor Signaling                                     | 4 (34)   |
| 17.6 SuperPath: Vitamin D-sensitive Calcium Signaling in Depression                   | 4 (34)   |
| 17.13 SuperPath: Glucose / Energy Metabolism                                          | 8 (307)  |
| 17.12 SuperPath: Detoxification of Reactive Oxygen Species                            | 4 (37)   |
| 17.12 SuperPath: LKB1 Signaling Events                                                | 4 (37)   |
| 17.06 SuperPath: PIP3 Activates AKT Signaling                                         | 8 (309)  |
| 16.45 SuperPath: Peptide Hormone Metabolism                                           | 5 (89)   |
| 16.43 SuperPath: NO-dependent CFTR Activation (normal and CF)                         | 3 (13)   |
| 16.43 SuperPath: Dopamine Metabolism                                                  | 3 (13)   |
| 16.34 SuperPath: Class A/1 (Rhodopsin-like Receptors)                                 | 10 (556) |
| 16.29 SuperPath: Beta-Adrenergic Signaling                                            | 8 (333)  |
| 16.27 SuperPath: Fibrin Complement Receptor 3 Signaling Pathway                       | 4 (43)   |

|                                                                                    |           |
|------------------------------------------------------------------------------------|-----------|
| 15.93 SuperPath: Small Cell Lung Cancer                                            | 5 (96)    |
| 15.86 SuperPath: Bacterial Infections in CF Airways                                | 5 (97)    |
| 15.82 SuperPath: Methionine Metabolism                                             | 3 (15)    |
| 15.78 SuperPath: LPA Receptor Mediated Events                                      | 4 (47)    |
| 15.78 SuperPath: Beta-2 Adrenergic-dependent CFTR Expression                       | 6 (167)   |
| 15.69 SuperPath: IL-9 Signaling Pathways                                           | 6 (169)   |
| 15.59 SuperPath: Ascorbate Recycling (cytosolic)                                   | 2 (2)     |
| 15.54 SuperPath: SREBF and MiR33 in Cholesterol and Lipid Homeostasis              | 3 (16)    |
| 15.27 SuperPath: FMLP Pathway                                                      | 7 (266)   |
| 15.21 SuperPath: Netrin-UNC5B Signaling Pathway                                    | 4 (52)    |
| 14.99 SuperPath: Response to Elevated Platelet Cytosolic Ca <sup>2+</sup>          | 10 (621)  |
| 14.9 SuperPath: Hepatitis C and Hepatocellular Carcinoma                           | 4 (55)    |
| 14.88 SuperPath: Infectious Disease                                                | 17 (1747) |
| 14.7 SuperPath: Microglia Pathogen Phagocytosis Pathway                            | 4 (57)    |
| 14.59 SuperPath: Antipsychotics Pathway (Metabolic Side Effects), Pharmacodynamics | 3 (20)    |
| 14.42 SuperPath: Defective SLC6A3 Causes Parkinsonism-dystonia Infantile (PKDYS)   | 2 (3)     |
| 14.38 SuperPath: MTHFR Deficiency                                                  | 3 (21)    |
| 14.38 SuperPath: PKC-gamma Calcium Signaling Pathway in Ataxia                     | 3 (21)    |
| 14.32 SuperPath: P75(NTR)-mediated Signaling                                       | 4 (61)    |
| 14.3 SuperPath: Endometrial Cancer                                                 | 6 (201)   |
| 14.3 SuperPath: Metapathway Biotransformation Phase I and II                       | 7 (296)   |
| 14.24 SuperPath: ESR-mediated Signaling                                            | 7 (298)   |
| 14.23 SuperPath: Transcriptional Regulation By MECP2                               | 4 (62)    |
| 14.23 SuperPath: IL 10 Signaling Pathway                                           | 4 (62)    |
| 14.23 SuperPath: CREB Pathway                                                      | 9 (529)   |
| 14.18 SuperPath: Unfolded Protein Response                                         | 3 (22)    |
| 14.18 SuperPath: Inhibition of Ribosome Biogenesis By P14(ARF)                     | 3 (22)    |
| 14.18 SuperPath: Roles of Ceramides in Development of Insulin Resistance           | 3 (22)    |
| 14.14 SuperPath: Lung Fibrosis                                                     | 4 (63)    |
| 14.13 SuperPath: Nanog in Mammalian ESC Pluripotency                               | 9 (534)   |
| 14 SuperPath: Sympathetic Nerve Pathway (Neuroeffector Junction)                   | 3 (23)    |
| 14 SuperPath: A-beta Plaque Formation and APP Metabolism                           | 3 (23)    |

|                                                                                                     |          |
|-----------------------------------------------------------------------------------------------------|----------|
| 13.82 SuperPath: RHO GTPases Activate NADPH Oxidases                                                | 3 (24)   |
| 13.82 SuperPath: Doxorubicin Pathway (Cardiomyocyte Cell), Pharmacodynamics                         | 3 (24)   |
| 13.77 SuperPath: Myometrial Relaxation and Contraction Pathways                                     | 6 (215)  |
| 13.72 SuperPath: Neurophysiological Process Glutamate Regulation of Dopamine D1A Receptor Signaling | 4 (68)   |
| 13.71 SuperPath: Toll-Like Receptor Signaling Pathways                                              | 5 (133)  |
| 13.65 SuperPath: Prolactin Signaling                                                                | 8 (432)  |
| 13.64 SuperPath: Alpha9 Beta1 Integrin Signaling Events                                             | 3 (25)   |
| 13.64 SuperPath: AP-1 Transcription Factor Network                                                  | 4 (69)   |
| 13.61 SuperPath: PI5P, PP2A and IER3 Regulate PI3K/AKT Signaling                                    | 5 (135)  |
| 13.6 SuperPath: Aromatase Inhibitor Pathway (Breast Cell), Pharmacodynamics                         | 2 (4)    |
| 13.48 SuperPath: Alpha-synuclein Signaling                                                          | 3 (26)   |
| 13.42 SuperPath: MTOR Signaling                                                                     | 5 (139)  |
| 13.42 SuperPath: Integrin Pathway                                                                   | 9 (570)  |
| 13.41 SuperPath: NF-kappaB Signaling                                                                | 7 (327)  |
| 13.35 SuperPath: GPCR Pathway                                                                       | 10 (712) |
| 13.32 SuperPath: B Heme Biosynthesis From Glycine                                                   | 3 (27)   |
| 13.32 SuperPath: Kynurenine Pathway and Links to Cell Senescence                                    | 3 (27)   |
| 13.32 SuperPath: Ponatinib Pathway, Pharmacokinetics/Pharmacodynamics                               | 3 (27)   |
| 13.18 SuperPath: Acute Viral Myocarditis                                                            | 4 (75)   |
| 13.17 SuperPath: Neuropathic Pain-Signaling in Dorsal Horn Neurons                                  | 6 (232)  |
| 13.16 SuperPath: Reelin Signaling Pathway                                                           | 3 (28)   |
| 13.16 SuperPath: Prostaglandin Signaling                                                            | 3 (28)   |
| 13.16 SuperPath: Selective Serotonin Reuptake Inhibitor Pathway, Pharmacodynamics                   | 3 (28)   |
| 13.16 SuperPath: Anti-diabetic Drug Potassium Channel Inhibitors Pathway, Pharmacodynamics          | 3 (28)   |
| 13.09 SuperPath: Immune Response CCR3 Signaling in Eosinophils                                      | 5 (146)  |
| 13.01 SuperPath: Amb2 Integrin Signaling                                                            | 3 (29)   |
| 13.01 SuperPath: NNOS Signaling at Neuronal Synapses                                                | 3 (29)   |
| 12.99 SuperPath: Regulation of Expression of SLITs and ROBOs                                        | 8 (462)  |
| 12.95 SuperPath: CNTF Signaling                                                                     | 5 (149)  |
| 12.86 SuperPath: Integrated Breast Cancer Pathway                                                   | 5 (151)  |
| 12.82 SuperPath: NF-kappaB Pathway                                                                  | 5 (152)  |
| 12.75 SuperPath: MAPK Signaling Pathway                                                             | 6 (245)  |

|                                                                                                      |          |
|------------------------------------------------------------------------------------------------------|----------|
| 12.73 SuperPath: Statin Inhibition of Cholesterol Production                                         | 3 (31)   |
| 12.73 SuperPath: Ethanol Effects on Histone Modifications                                            | 3 (31)   |
| 12.73 SuperPath: Osteopontin-mediated Events                                                         | 3 (31)   |
| 12.73 SuperPath: Syndecan-4-mediated Signaling Events                                                | 3 (31)   |
| 12.73 SuperPath: Antiviral and Anti-inflammatory Effects of Nrf2 on SARS-CoV-2 Pathway               | 3 (31)   |
| 12.6 SuperPath: Inflammasomes                                                                        | 3 (32)   |
| 12.6 SuperPath: A-beta Uptake and Degradation                                                        | 3 (32)   |
| 12.56 SuperPath: IL-1 Family Signaling Pathways                                                      | 5 (158)  |
| 12.55 SuperPath: Fc-GammaR Pathway                                                                   | 4 (84)   |
| 12.43 SuperPath: MicroRNA Network Associated With Chronic Lymphocytic Leukemia                       | 2 (6)    |
| 12.43 SuperPath: Venlafaxine Pathway, Pharmacokinetics                                               | 2 (6)    |
| 12.43 SuperPath: LncRNA-mediated Mechanisms of Therapeutic Resistance                                | 2 (6)    |
| 12.3 SuperPath: Platelet Homeostasis                                                                 | 4 (88)   |
| 12.3 SuperPath: MAPK Pathway                                                                         | 4 (88)   |
| 12.24 SuperPath: Angiogenesis (CST)                                                                  | 4 (89)   |
| 12.22 SuperPath: Nuclear Receptors in Lipid Metabolism and Toxicity                                  | 3 (35)   |
| 12.22 SuperPath: Validated Transcriptional Targets of AP1 Family Members Fra1 and Fra2               | 3 (35)   |
| 12.2 SuperPath: Regulation of Activated PAK-2p34 By Proteasome Mediated Degradation                  | 11 (943) |
| 12.07 SuperPath: TNF Superfamily - Human Ligand-Receptor Interactions and Their Associated Functions | 5 (170)  |
| 11.98 SuperPath: Type II Interferon Signaling                                                        | 3 (37)   |
| 11.98 SuperPath: Photodynamic Therapy-induced HIF-1 Survival Signaling                               | 3 (37)   |
| 11.86 SuperPath: MAPK-Erk Pathway                                                                    | 6 (275)  |
| 11.83 SuperPath: TGF-beta Signaling Pathways                                                         | 4 (96)   |
| 11.82 SuperPath: P70S6K Signaling                                                                    | 7 (392)  |
| 11.8 SuperPath: Sertoli-Sertoli Cell Junction Dynamics                                               | 7 (393)  |
| 11.76 SuperPath: Urokinase-type Plasminogen Activator (uPA) and UPAR-mediated Signaling              | 3 (39)   |
| 11.76 SuperPath: Immune Infiltration in Pancreatic Cancer                                            | 3 (39)   |
| 11.66 SuperPath: Bladder Cancer                                                                      | 3 (40)   |
| 11.66 SuperPath: Unblocking of NMDA Receptors, Glutamate Binding and Activation                      | 3 (40)   |
| 11.61 SuperPath: Glycolysis in Senescence                                                            | 2 (8)    |
| 11.55 SuperPath: Common Pathways Underlying Drug Addiction                                           | 3 (41)   |
| 11.55 SuperPath: GPCRs, Other                                                                        | 4 (101)  |

|                                                                                            |           |
|--------------------------------------------------------------------------------------------|-----------|
| 11.5 SuperPath: DNA Damage Response (only ATM Dependent)                                   | 4 (102)   |
| 11.5 SuperPath: Akt Signaling                                                              | 9 (682)   |
| 11.45 SuperPath: Clomipramine Pathway, Pharmacokinetics                                    | 3 (42)    |
| 11.45 SuperPath: L-citrulline Metabolism                                                   | 3 (42)    |
| 11.35 SuperPath: Signaling By SCF-KIT                                                      | 3 (43)    |
| 11.35 SuperPath: Mechanisms of CFTR Activation By S-nitrosoglutathione (normal and CF)     | 3 (43)    |
| 11.34 SuperPath: Senescence and Autophagy in Cancer                                        | 4 (105)   |
| 11.34 SuperPath: TNFR1 Pathway                                                             | 5 (190)   |
| 11.32 SuperPath: ERK Signaling                                                             | 12 (1185) |
| 11.31 SuperPath: Metabolism of Water-soluble Vitamins and Cofactors                        | 5 (191)   |
| 11.26 SuperPath: Signal Transduction_JNK Pathway                                           | 3 (44)    |
| 11.21 SuperPath: Metabolism of Steroids                                                    | 5 (194)   |
| 11.19 SuperPath: G-protein Signaling RAC1 in Cellular Process                              | 4 (108)   |
| 11.16 SuperPath: Transcription_Role of VDR in Regulation of Genes Involved in Osteoporosis | 3 (45)    |
| 11.07 SuperPath: Nonalcoholic Fatty Liver Disease                                          | 3 (46)    |
| 10.99 SuperPath: Gastrin Signaling Pathway                                                 | 4 (112)   |
| 10.98 SuperPath: Statin Pathway - Generalized, Pharmacokinetics                            | 3 (47)    |
| 10.98 SuperPath: Nicotine Pathway (Dopaminergic Neuron), Pharmacodynamics                  | 3 (47)    |
| 10.98 SuperPath: Interleukin-10 Signaling                                                  | 3 (47)    |
| 10.98 SuperPath: Glutathione Conjugation                                                   | 3 (47)    |
| 10.97 SuperPath: Aspirin and MiRNAs                                                        | 2 (10)    |
| 10.97 SuperPath: Vinka Alkaloid Pathway, Pharmacokinetics                                  | 2 (10)    |
| 10.97 SuperPath: Mammary Gland Development Pathway - Involution (Stage 4 of 4)             | 2 (10)    |
| 10.8 SuperPath: T-cell Activation SARS-CoV-2                                               | 4 (116)   |
| 10.71 SuperPath: Calmodulin Induced Events                                                 | 4 (118)   |
| 10.7 SuperPath: Neuroinflammation                                                          | 2 (11)    |
| 10.69 SuperPath: G-protein Signaling G-Protein Alpha-i Signaling Cascades                  | 5 (210)   |
| 10.67 SuperPath: Death Receptor Signaling Pathway                                          | 4 (119)   |
| 10.64 SuperPath: Activation of NF-KappaB By PKR                                            | 3 (51)    |
| 10.64 SuperPath: Non-genomic Actions of 1,25 Dihydroxyvitamin D3                           | 3 (51)    |
| 10.6 SuperPath: Programmed Cell Death                                                      | 5 (213)   |
| 10.53 SuperPath: Drug ADME                                                                 | 4 (122)   |

|                                                                                       |         |
|---------------------------------------------------------------------------------------|---------|
| 10.45 SuperPath: Cell-type Dependent Selectivity of CCK2R Signaling                   | 2 (12)  |
| 10.45 SuperPath: Methionine Degradation                                               | 2 (12)  |
| 10.33 SuperPath: MTOR Signalling                                                      | 3 (55)  |
| 10.32 SuperPath: Immune Response CD16 Signaling in NK Cells                           | 4 (127) |
| 10.25 SuperPath: Matrix Metalloproteinases                                            | 3 (56)  |
| 10.25 SuperPath: Development Angiotensin Activation of ERK                            | 5 (225) |
| 10.25 SuperPath: RAC1 GTPase Cycle                                                    | 5 (225) |
| 10.24 SuperPath: Ebola Virus Infection in Host                                        | 4 (129) |
| 10.18 SuperPath: CXCR4-mediated Signaling Events                                      | 3 (57)  |
| 10.16 SuperPath: Autophagy Pathway                                                    | 5 (228) |
| 10.15 SuperPath: 22q11.2 Copy Number Variation Syndrome                               | 4 (131) |
| 10.11 SuperPath: MTOR Pathway                                                         | 3 (58)  |
| 10.11 SuperPath: Celecoxib Pathway, Pharmacodynamics                                  | 3 (58)  |
| 10.01 SuperPath: Trans-sulfuration Pathway                                            | 2 (14)  |
| 10.01 SuperPath: S1P1 Pathway                                                         | 2 (14)  |
| 9.99 SuperPath: RAC2 GTPase Cycle                                                     | 4 (135) |
| 9.97 SuperPath: IL27-mediated Signaling Events                                        | 3 (60)  |
| 9.89 SuperPath: TCR Signaling (Qiagen)                                                | 5 (238) |
| 9.84 SuperPath: Cellular Responses to Stimuli                                         | 9 (802) |
| 9.83 SuperPath: MiRNA Role in Immune Response in Sepsis                               | 3 (62)  |
| 9.83 SuperPath: Inhibitory Action of Lipoxins on Superoxide Production in Neutrophils | 3 (62)  |
| 9.82 SuperPath: Quercetin and Nf-kB / AP-1 Induced Apoptosis                          | 2 (15)  |
| 9.82 SuperPath: Lamotrigine Pathway, Pharmacokinetics and Pharmacodynamics            | 2 (15)  |

<Banhasasim-tang Superpath>

| Score | Name                                                                   | # Matched Genes (Total Genes) |
|-------|------------------------------------------------------------------------|-------------------------------|
| 63.65 | SuperPath: Methylphenidate Pathway, Pharmacodynamics                   | 10 (18)                       |
| 53    | SuperPath: Neuroscience                                                | 18 (341)                      |
| 48.25 | SuperPath: Monoamine Transport                                         | 9 (33)                        |
| 43.3  | SuperPath: Interleukin-4 and Interleukin-13 Signaling                  | 11 (108)                      |
| 42.33 | SuperPath: Spinal Cord Injury                                          | 11 (115)                      |
| 42.18 | SuperPath: Metabolism                                                  | 31 (2121)                     |
| 41.99 | SuperPath: Immune Response IL-23 Signaling Pathway                     | 12 (160)                      |
| 41.99 | SuperPath: Alzheimer's Disease and MiRNA Effects                       | 14 (266)                      |
| 40.68 | SuperPath: Development Dopamine D2 Receptor Transactivation of EGFR    | 11 (128)                      |
| 39.72 | SuperPath: Signal Transduction                                         | 33 (2590)                     |
| 39.46 | SuperPath: Neurotransmitter Clearance                                  | 6 (10)                        |
| 37.75 | SuperPath: Burn Wound Healing                                          | 9 (75)                        |
| 37.53 | SuperPath: Transmission Across Chemical Synapses                       | 15 (410)                      |
| 37.44 | SuperPath: Photodynamic Therapy-induced NF-kB Survival Signaling       | 8 (48)                        |
| 34.52 | SuperPath: Neuroinflammation and Glutamatergic Signaling               | 10 (140)                      |
| 33.89 | SuperPath: MIF Mediated Glucocorticoid Regulation                      | 17 (681)                      |
| 33.5  | SuperPath: Biogenic Amine Synthesis                                    | 6 (20)                        |
| 29.93 | SuperPath: ATF-2 Transcription Factor Network                          | 7 (57)                        |
| 29.8  | SuperPath: GPCR Downstream Signalling                                  | 16 (710)                      |
| 29.28 | SuperPath: Development VEGF Signaling Via VEGFR2 - Generic Cascades    | 9 (147)                       |
| 29.05 | SuperPath: Toll Comparative Pathway                                    | 8 (101)                       |
| 28.71 | SuperPath: ACE Inhibitor Pathway, Pharmacodynamics                     | 6 (35)                        |
| 28.36 | SuperPath: G-Beta Gamma Signaling                                      | 10 (219)                      |
| 28.31 | SuperPath: Sudden Infant Death Syndrome (SIDS) Susceptibility Pathways | 9 (159)                       |
| 27.85 | SuperPath: Colorectal Cancer Metastasis                                | 9 (165)                       |
| 27.61 | SuperPath: Hepatocyte Growth Factor Receptor Signaling                 | 8 (115)                       |
| 26.96 | SuperPath: Monoamine GPCRs                                             | 6 (43)                        |
| 26.96 | SuperPath: Insulin Receptor Recycling                                  | 7 (77)                        |
| 26.77 | SuperPath: NO/cGMP/PKG Mediated Neuroprotection                        | 6 (44)                        |

|                                                                                             |           |
|---------------------------------------------------------------------------------------------|-----------|
| 25.96 SuperPath: Signaling By Receptor Tyrosine Kinases                                     | 13 (524)  |
| 25.83 SuperPath: Development Ligand-independent Activation of ESR1 and ESR2                 | 8 (135)   |
| 25.68 SuperPath: IL-18 Signaling Pathway                                                    | 6 (50)    |
| 25.58 SuperPath: Plasma Membrane Estrogen Receptor Signaling                                | 5 (24)    |
| 25.22 SuperPath: Amino Acid Metabolism                                                      | 7 (92)    |
| 24.8 SuperPath: Toll-like Receptor Signaling Pathway                                        | 10 (285)  |
| 24.48 SuperPath: Apoptosis and Survival_Anti-apoptotic Action of Nuclear ESR1 and ESR2      | 5 (28)    |
| 24.48 SuperPath: Doxorubicin Pathway, Pharmacokinetics                                      | 5 (28)    |
| 24.03 SuperPath: Blood-Brain Barrier and Immune Cell Transmigration: VCAM-1/CD106 Signaling | 7 (104)   |
| 23.97 SuperPath: PI3K-Akt Signaling Pathway                                                 | 11 (390)  |
| 23.72 SuperPath: Innate Immune System                                                       | 23 (2024) |
| 23.47 SuperPath: Nuclear Receptors Meta-pathway                                             | 10 (315)  |
| 23.46 SuperPath: Sympathetic Nerve Pathway (Pre- and Post- Ganglionic Junction)             | 4 (12)    |
| 23.27 SuperPath: Apoptotic Pathways in Synovial Fibroblasts                                 | 14 (731)  |
| 22.94 SuperPath: ADORA2B Mediated Anti-inflammatory Cytokines Production                    | 11 (419)  |
| 22.9 SuperPath: IL-10 Pathway                                                               | 5 (35)    |
| 22.73 SuperPath: Fragile X Syndrome                                                         | 7 (119)   |
| 22.7 SuperPath: Genetic Causes of Porto-sinusoidal Vascular Disease                         | 5 (36)    |
| 22.7 SuperPath: Amyotrophic Lateral Sclerosis (ALS)                                         | 5 (36)    |
| 22.58 SuperPath: RXR and RAR Heterodimerization With Other Nuclear Receptor                 | 4 (14)    |
| 22.18 SuperPath: Etoposide Pathway, Pharmacokinetics/Pharmacodynamics                       | 4 (15)    |
| 22.17 SuperPath: Ca, CAMP and Lipid Signaling                                               | 7 (126)   |
| 21.95 SuperPath: Bladder Cancer                                                             | 5 (40)    |
| 21.81 SuperPath: LDL Oxidation in Atherogenesis                                             | 4 (16)    |
| 21.81 SuperPath: Ethanol Degradation II                                                     | 4 (16)    |
| 21.73 SuperPath: GDNF Signaling                                                             | 7 (132)   |
| 21.65 SuperPath: Toll-Like Receptor Signaling Pathways                                      | 7 (133)   |
| 21.14 SuperPath: Tyrosine Metabolism P.1 (dopamine)                                         | 4 (18)    |
| 20.83 SuperPath: Overview of Nanoparticle Effects                                           | 4 (19)    |
| 20.83 SuperPath: Cellular Roles of Anthrax Toxin                                            | 4 (19)    |
| 20.76 SuperPath: Immune Response CCR3 Signaling in Eosinophils                              | 7 (146)   |
| 20.67 SuperPath: MSP-RON Signaling                                                          | 5 (48)    |



|                                                                                        |          |
|----------------------------------------------------------------------------------------|----------|
| 20.5 SuperPath: Cytokine Signaling in Immune System                                    | 13 (730) |
| 20.47 SuperPath: Activation of NMDA Receptors and Postsynaptic Events                  | 6 (93)   |
| 20.32 SuperPath: Glucose / Energy Metabolism                                           | 9 (307)  |
| 20.31 SuperPath: AMPK Enzyme Complex Pathway                                           | 7 (153)  |
| 20.26 SuperPath: Sildenafil Treatment                                                  | 4 (21)   |
| 20.24 SuperPath: Non-genomic Actions of 1,25 Dihydroxyvitamin D3                       | 5 (51)   |
| 20.24 SuperPath: PIP3 Activates AKT Signaling                                          | 9 (309)  |
| 20.13 SuperPath: Dopamine-DARPP32 Feedback Onto CAMP Pathway                           | 8 (228)  |
| 20.12 SuperPath: Bacterial Infections in CF Airways                                    | 6 (97)   |
| 20.1 SuperPath: Phosphodiesterases in Neuronal Function                                | 5 (52)   |
| 20.1 SuperPath: Netrin-UNC5B Signaling Pathway                                         | 5 (52)   |
| 20 SuperPath: Nitric Oxide Stimulates Guanylate Cyclase                                | 4 (22)   |
| 19.95 SuperPath: AMP-activated Protein Kinase Signaling                                | 6 (99)   |
| 19.74 SuperPath: A-beta Plaque Formation and APP Metabolism                            | 4 (23)   |
| 19.71 SuperPath: Hepatitis C and Hepatocellular Carcinoma                              | 5 (55)   |
| 19.58 SuperPath: Prostaglandin Synthesis and Regulation                                | 5 (56)   |
| 19.5 SuperPath: G-protein Signaling_Rac2 Regulation Pathway                            | 4 (24)   |
| 19.5 SuperPath: RHO GTPases Activate NADPH Oxidases                                    | 4 (24)   |
| 19.46 SuperPath: Senescence and Autophagy in Cancer                                    | 6 (105)  |
| 19.37 SuperPath: IL-9 Signaling Pathways                                               | 7 (169)  |
| 19.27 SuperPath: Pathogenesis of ALS                                                   | 4 (25)   |
| 19.23 SuperPath: Signaling By VEGF                                                     | 6 (108)  |
| 19.05 SuperPath: Alpha-synuclein Signaling                                             | 4 (26)   |
| 18.97 SuperPath: Class A/1 (Rhodopsin-like Receptors)                                  | 11 (556) |
| 18.87 SuperPath: Inhibitory Action of Lipoxins on Superoxide Production in Neutrophils | 5 (62)   |
| 18.63 SuperPath: Prostaglandin Signaling                                               | 4 (28)   |
| 18.63 SuperPath: Integrin Pathway                                                      | 11 (570) |
| 18.5 SuperPath: FMLP Pathway                                                           | 8 (266)  |
| 18.46 SuperPath: Glycolysis in Senescence                                              | 3 (8)    |
| 18.33 SuperPath: One-carbon Metabolism and Related Pathways                            | 5 (67)   |
| 18.23 SuperPath: N-cadherin Signaling Events                                           | 4 (30)   |
| 18.13 SuperPath: AP-1 Transcription Factor Network                                     | 5 (69)   |

|                                                                                            |          |
|--------------------------------------------------------------------------------------------|----------|
| 18.05 SuperPath: CAMKK2 Pathway                                                            | 4 (31)   |
| 17.96 SuperPath: Folate-alcohol and Cancer Pathway Hypotheses                              | 3 (9)    |
| 17.74 SuperPath: Endometrial Cancer                                                        | 7 (201)  |
| 17.69 SuperPath: Signaling Mediated By P38-alpha and P38-beta                              | 4 (33)   |
| 17.55 SuperPath: Acute Viral Myocarditis                                                   | 5 (75)   |
| 17.53 SuperPath: Methotrexate Pathway (Cancer Cell), Pharmacodynamics and Pharmacokinetics | 4 (34)   |
| 17.53 SuperPath: Thromboxane A2 Receptor Signaling                                         | 4 (34)   |
| 17.53 SuperPath: Vitamin D-sensitive Calcium Signaling in Depression                       | 4 (34)   |
| 17.46 SuperPath: Response to Elevated Platelet Cytosolic Ca <sup>2+</sup>                  | 11 (621) |
| 17.4 SuperPath: PI5P, PP2A and IER3 Regulate PI3K/AKT Signaling                            | 6 (135)  |
| 17.33 SuperPath: G-protein Signaling G-Protein Alpha-i Signaling Cascades                  | 7 (210)  |
| 17.31 SuperPath: ESR-mediated Signaling                                                    | 8 (298)  |
| 17.16 SuperPath: MTOR Signaling                                                            | 6 (139)  |
| 17.05 SuperPath: Photodynamic Therapy-induced HIF-1 Survival Signaling                     | 4 (37)   |
| 17.05 SuperPath: Detoxification of Reactive Oxygen Species                                 | 4 (37)   |
| 16.8 SuperPath: CREB Pathway                                                               | 10 (529) |
| 16.75 SuperPath: Immune Infiltration in Pancreatic Cancer                                  | 4 (39)   |
| 16.49 SuperPath: Integrated Breast Cancer Pathway                                          | 6 (151)  |
| 16.49 SuperPath: Regulation of Activated PAK-2p34 By Proteasome Mediated Degradation       | 13 (943) |
| 16.47 SuperPath: Common Pathways Underlying Drug Addiction                                 | 4 (41)   |
| 16.41 SuperPath: Neuropathic Pain-Signaling in Dorsal Horn Neurons                         | 7 (232)  |
| 16.38 SuperPath: NO-dependent CFTR Activation (normal and CF)                              | 3 (13)   |
| 16.38 SuperPath: Dopamine Metabolism                                                       | 3 (13)   |
| 16.36 SuperPath: Prolactin Signaling                                                       | 9 (432)  |
| 16.21 SuperPath: Corticotropin-releasing Hormone Signaling Pathway                         | 5 (91)   |
| 16.2 SuperPath: Fibrin Complement Receptor 3 Signaling Pathway                             | 4 (43)   |
| 16.16 SuperPath: Beta-Adrenergic Signaling                                                 | 8 (333)  |
| 16.12 SuperPath: IL-1 Family Signaling Pathways                                            | 6 (158)  |
| 16.07 SuperPath: Immune Response_Role of Integrins in NK Cells Cytotoxicity                | 4 (44)   |
| 15.84 SuperPath: Small Cell Lung Cancer                                                    | 5 (96)   |
| 15.84 SuperPath: TGF-beta Signaling Pathways                                               | 5 (96)   |
| 15.7 SuperPath: Interleukin-10 Signaling                                                   | 4 (47)   |

|                                                                                                      |           |
|------------------------------------------------------------------------------------------------------|-----------|
| 15.7 SuperPath: LPA Receptor Mediated Events                                                         | 4 (47)    |
| 15.68 SuperPath: Beta-2 Adrenergic-dependent CFTR Expression                                         | 6 (167)   |
| 15.63 SuperPath: GPCR Pathway                                                                        | 11 (712)  |
| 15.6 SuperPath: Regulation of Expression of SLITs and ROBOs                                          | 9 (462)   |
| 15.55 SuperPath: Ascorbate Recycling (cytosolic)                                                     | 2 (2)     |
| 15.53 SuperPath: TNF Superfamily - Human Ligand-Receptor Interactions and Their Associated Functions | 6 (170)   |
| 15.49 SuperPath: SREBF and MiR33 in Cholesterol and Lipid Homeostasis                                | 3 (16)    |
| 15.43 SuperPath: DNA Damage Response (only ATM Dependent)                                            | 5 (102)   |
| 15.19 SuperPath: ERK Signaling                                                                       | 14 (1185) |
| 15.04 SuperPath: IL-17 Family Signaling Pathways                                                     | 5 (108)   |
| 14.85 SuperPath: MAPK-Erk Pathway                                                                    | 7 (275)   |
| 14.79 SuperPath: Gastrin Signaling Pathway                                                           | 5 (112)   |
| 14.76 SuperPath: Angiogenesis (WikiPathways)                                                         | 3 (19)    |
| 14.72 SuperPath: LT-BetaR Pathway                                                                    | 4 (56)    |
| 14.64 SuperPath: TNFR1 Pathway                                                                       | 6 (190)   |
| 14.63 SuperPath: Microglia Pathogen Phagocytosis Pathway                                             | 4 (57)    |
| 14.55 SuperPath: T-cell Activation SARS-CoV-2                                                        | 5 (116)   |
| 14.54 SuperPath: Antipsychotics Pathway (Metabolic Side Effects), Pharmacodynamics                   | 3 (20)    |
| 14.49 SuperPath: P70S6K Signaling                                                                    | 8 (392)   |
| 14.47 SuperPath: Sertoli-Sertoli Cell Junction Dynamics                                              | 8 (393)   |
| 14.43 SuperPath: Calmodulin Induced Events                                                           | 5 (118)   |
| 14.39 SuperPath: Defective SLC6A3 Causes Parkinsonism-dystonia Infantile (PKDYS)                     | 2 (3)     |
| 14.38 SuperPath: Death Receptor Signaling Pathway                                                    | 5 (119)   |
| 14.33 SuperPath: PKC-gamma Calcium Signaling Pathway in Ataxia                                       | 3 (21)    |
| 14.28 SuperPath: Nuclear Events Mediated By NFE2L2                                                   | 6 (199)   |
| 14.25 SuperPath: P75(NTR)-mediated Signaling                                                         | 4 (61)    |
| 14.18 SuperPath: Metapathway Biotransformation Phase I and II                                        | 7 (296)   |
| 14.16 SuperPath: IL 10 Signaling Pathway                                                             | 4 (62)    |
| 14.16 SuperPath: Transcriptional Regulation By MECP2                                                 | 4 (62)    |
| 14.16 SuperPath: MiRNA Role in Immune Response in Sepsis                                             | 4 (62)    |
| 14.13 SuperPath: Unfolded Protein Response                                                           | 3 (22)    |
| 14.13 SuperPath: Inhibition of Ribosome Biogenesis By P14(ARF)                                       | 3 (22)    |

|                                                                                                     |           |
|-----------------------------------------------------------------------------------------------------|-----------|
| 14.13 SuperPath: Roles of Ceramides in Development of Insulin Resistance                            | 3 (22)    |
| 14.13 SuperPath: Type II Diabetes Mellitus                                                          | 3 (22)    |
| 14.07 SuperPath: Lung Fibrosis                                                                      | 4 (63)    |
| 13.99 SuperPath: Nanog in Mammalian ESC Pluripotency                                                | 9 (534)   |
| 13.98 SuperPath: Ferroptosis                                                                        | 4 (64)    |
| 13.94 SuperPath: Sympathetic Nerve Pathway (Neuroeffector Junction)                                 | 3 (23)    |
| 13.94 SuperPath: Epstein-Barr Virus LMP1 Signaling                                                  | 3 (23)    |
| 13.94 SuperPath: Estrogen Signaling Pathway                                                         | 3 (23)    |
| 13.94 SuperPath: MNAR-PELP1 and Estrogen Receptor Interaction                                       | 3 (23)    |
| 13.94 SuperPath: Immune Response CD16 Signaling in NK Cells                                         | 5 (127)   |
| 13.83 SuperPath: Ebola Virus Infection in Host                                                      | 5 (129)   |
| 13.76 SuperPath: Doxorubicin Pathway (Cardiomyocyte Cell), Pharmacodynamics                         | 3 (24)    |
| 13.71 SuperPath: Akt Signaling                                                                      | 10 (682)  |
| 13.67 SuperPath: Myometrial Relaxation and Contraction Pathways                                     | 6 (215)   |
| 13.65 SuperPath: Neurophysiological Process Glutamate Regulation of Dopamine D1A Receptor Signaling | 4 (68)    |
| 13.64 SuperPath: PAK Pathway                                                                        | 10 (686)  |
| 13.59 SuperPath: Alpha9 Beta1 Integrin Signaling Events                                             | 3 (25)    |
| 13.56 SuperPath: Aromatase Inhibitor Pathway (Breast Cell), Pharmacodynamics                        | 2 (4)     |
| 13.56 SuperPath: Cells and Molecules Involved in Local Acute Inflammatory Response                  | 2 (4)     |
| 13.49 SuperPath: Development EGFR Signaling Via Small GTPases                                       | 4 (70)    |
| 13.49 SuperPath: CCR5 Pathway in Macrophages                                                        | 7 (320)   |
| 13.31 SuperPath: Development Angiotensin Activation of ERK                                          | 6 (225)   |
| 13.26 SuperPath: Kynurenine Pathway and Links to Cell Senescence                                    | 3 (27)    |
| 13.26 SuperPath: Response of Mtb to Phagocytosis                                                    | 3 (27)    |
| 13.11 SuperPath: Selective Serotonin Reuptake Inhibitor Pathway, Pharmacodynamics                   | 3 (28)    |
| 13.11 SuperPath: Anti-diabetic Drug Potassium Channel Inhibitors Pathway, Pharmacodynamics          | 3 (28)    |
| 12.96 SuperPath: NNOS Signaling at Neuronal Synapses                                                | 3 (29)    |
| 12.96 SuperPath: Amb2 Integrin Signaling                                                            | 3 (29)    |
| 12.87 SuperPath: TCR Signaling (Qiagen)                                                             | 6 (238)   |
| 12.86 SuperPath: CNTF Signaling                                                                     | 5 (149)   |
| 12.8 SuperPath: Infectious Disease                                                                  | 16 (1747) |
| 12.73 SuperPath: NF-kappaB Pathway                                                                  | 5 (152)   |

|                                                                                           |          |
|-------------------------------------------------------------------------------------------|----------|
| 12.68 SuperPath: Ethanol Effects on Histone Modifications                                 | 3 (31)   |
| 12.68 SuperPath: Osteopontin-mediated Events                                              | 3 (31)   |
| 12.68 SuperPath: IL8- and CXCR2-mediated Signaling Events                                 | 3 (31)   |
| 12.68 SuperPath: Antiviral and Anti-inflammatory Effects of Nrf2 on SARS-CoV-2 Pathway    | 3 (31)   |
| 12.68 SuperPath: Syndecan-4-mediated Signaling Events                                     | 3 (31)   |
| 12.68 SuperPath: Statin Inhibition of Cholesterol Production                              | 3 (31)   |
| 12.65 SuperPath: MAPK Signaling Pathway                                                   | 6 (245)  |
| 12.64 SuperPath: Development EGFR Signaling Pathway                                       | 5 (154)  |
| 12.54 SuperPath: A-beta Uptake and Degradation                                            | 3 (32)   |
| 12.48 SuperPath: Fc-GammaR Pathway                                                        | 4 (84)   |
| 12.48 SuperPath: BAFF in B-Cell Signaling                                                 | 4 (84)   |
| 12.41 SuperPath: Apoptosis and Survival_Regulation of Apoptosis By Mitochondrial Proteins | 3 (33)   |
| 12.41 SuperPath: Oxidative Stress Response                                                | 3 (33)   |
| 12.4 SuperPath: MicroRNA Network Associated With Chronic Lymphocytic Leukemia             | 2 (6)    |
| 12.4 SuperPath: Venlafaxine Pathway, Pharmacokinetics                                     | 2 (6)    |
| 12.4 SuperPath: LncRNA-mediated Mechanisms of Therapeutic Resistance                      | 2 (6)    |
| 12.36 SuperPath: Regulation of Actin Dynamics For Phagocytic Cup Formation                | 4 (86)   |
| 12.29 SuperPath: Development A2A Receptor Signaling                                       | 4 (87)   |
| 12.29 SuperPath: NGF Pathway                                                              | 4 (87)   |
| 12.23 SuperPath: MAPK Pathway                                                             | 4 (88)   |
| 12.23 SuperPath: Platelet Homeostasis                                                     | 4 (88)   |
| 12.17 SuperPath: Nuclear Receptors in Lipid Metabolism and Toxicity                       | 3 (35)   |
| 12.17 SuperPath: Validated Transcriptional Targets of AP1 Family Members Fra1 and Fra2    | 3 (35)   |
| 12.17 SuperPath: Peptide Hormone Metabolism                                               | 4 (89)   |
| 11.99 SuperPath: PI3K / Akt Signaling                                                     | 4 (92)   |
| 11.93 SuperPath: Type II Interferon Signaling                                             | 3 (37)   |
| 11.93 SuperPath: Allograft Rejection                                                      | 4 (93)   |
| 11.93 SuperPath: Ceramide Pathway                                                         | 4 (93)   |
| 11.87 SuperPath: 4-1BB Pathway                                                            | 5 (173)  |
| 11.82 SuperPath: Parkinson's Disease Pathway                                              | 3 (38)   |
| 11.82 SuperPath: TGF-Beta Pathway                                                         | 9 (653)  |
| 11.82 SuperPath: Cellular Responses to Stimuli                                            | 10 (802) |

|                                                                                            |         |
|--------------------------------------------------------------------------------------------|---------|
| 11.76 SuperPath: CCL18 Signaling Pathway                                                   | 4 (96)  |
| 11.71 SuperPath: Urokinase-type Plasminogen Activator (uPA) and UPAR-mediated Signaling    | 3 (39)  |
| 11.6 SuperPath: Cytoskeleton Remodeling Role of PDGFs in Cell Migration                    | 3 (40)  |
| 11.6 SuperPath: Unblocking of NMDA Receptors, Glutamate Binding and Activation             | 3 (40)  |
| 11.53 SuperPath: GDNF-Family Ligands and Receptor Interactions                             | 4 (100) |
| 11.51 SuperPath: Translation Insulin Regulation of Translation                             | 5 (183) |
| 11.48 SuperPath: GPCRs, Other                                                              | 4 (101) |
| 11.48 SuperPath: CCR3 Pathway in Eosinophils                                               | 4 (101) |
| 11.4 SuperPath: Metabolic Reprogramming in Pancreatic Cancer                               | 3 (42)  |
| 11.4 SuperPath: Clomipramine Pathway, Pharmacokinetics                                     | 3 (42)  |
| 11.4 SuperPath: L-citrulline Metabolism                                                    | 3 (42)  |
| 11.3 SuperPath: Signaling By SCF-KIT                                                       | 3 (43)  |
| 11.3 SuperPath: Mechanisms of CFTR Activation By S-nitrosoglutathione (normal and CF)      | 3 (43)  |
| 11.23 SuperPath: Metabolism of Water-soluble Vitamins and Cofactors                        | 5 (191) |
| 11.22 SuperPath: Development A3 Receptor Signaling                                         | 4 (106) |
| 11.2 SuperPath: Interleukin-11 Signaling Pathway                                           | 3 (44)  |
| 11.2 SuperPath: Signal Transduction_JNK Pathway                                            | 3 (44)  |
| 11.12 SuperPath: G-protein Signaling RAC1 in Cellular Process                              | 4 (108) |
| 11.12 SuperPath: Metabolism of Steroids                                                    | 5 (194) |
| 11.11 SuperPath: Transcription_Role of VDR in Regulation of Genes Involved in Osteoporosis | 3 (45)  |
| 11.02 SuperPath: Nonalcoholic Fatty Liver Disease                                          | 3 (46)  |
| 10.96 SuperPath: Breast Cancer Pathway                                                     | 5 (199) |
| 10.93 SuperPath: Arsenic Metabolism and Reactive Oxygen Species Generation                 | 2 (10)  |
| 10.93 SuperPath: Aspirin and MiRNAs                                                        | 2 (10)  |
| 10.93 SuperPath: Mammary Gland Development Pathway - Involution (Stage 4 of 4)             | 2 (10)  |
| 10.93 SuperPath: Vinka Alkaloid Pathway, Pharmacokinetics                                  | 2 (10)  |
| 10.93 SuperPath: Nicotine Pathway (Dopaminergic Neuron), Pharmacodynamics                  | 3 (47)  |
| 10.93 SuperPath: Statin Pathway - Generalized, Pharmacokinetics                            | 3 (47)  |
| 10.93 SuperPath: Glutathione Conjugation                                                   | 3 (47)  |
| 10.92 SuperPath: MicroRNAs in Cardiomyocyte Hypertrophy                                    | 4 (112) |
| 10.78 SuperPath: Development Endothelin-1/EDNRA Transactivation of EGFR                    | 4 (115) |
| 10.76 SuperPath: FCERI Mediated Ca <sup>2+</sup> Mobilization                              | 3 (49)  |

|                                                                                    |         |
|------------------------------------------------------------------------------------|---------|
| 10.66 SuperPath: Orexin Receptor Pathway                                           | 2 (11)  |
| 10.66 SuperPath: Neuroinflammation                                                 | 2 (11)  |
| 10.6 SuperPath: L1CAM Interactions                                                 | 4 (119) |
| 10.59 SuperPath: Calcineurin-regulated NFAT-dependent Transcription in Lymphocytes | 3 (51)  |
| 10.59 SuperPath: Synaptic Vesicle Pathway                                          | 3 (51)  |
| 10.59 SuperPath: Activation of NF-KappaB By PKR                                    | 3 (51)  |
| 10.52 SuperPath: Programmed Cell Death                                             | 5 (213) |
| 10.47 SuperPath: NFAT and Cardiac Hypertrophy                                      | 6 (326) |
| 10.46 SuperPath: Drug ADME                                                         | 4 (122) |
| 10.46 SuperPath: VEGF Pathway (Qiagen)                                             | 4 (122) |
| 10.45 SuperPath: NF-kappaB Signaling                                               | 6 (327) |
| 10.43 SuperPath: NRP1-triggered Signaling Pathways in Pancreatic Cancer            | 3 (53)  |
| 10.41 SuperPath: Methionine Degradation                                            | 2 (12)  |
| 10.41 SuperPath: MIF Action Through Endocytic Pathway                              | 2 (12)  |
| 10.41 SuperPath: Cell-type Dependent Selectivity of CCK2R Signaling                | 2 (12)  |
| 10.35 SuperPath: Signaling Events Mediated By Focal Adhesion Kinase                | 3 (54)  |
| 10.35 SuperPath: HIF1Alpha Pathway                                                 | 3 (54)  |
| 10.28 SuperPath: NF-kB (NFkB) Pathway                                              | 3 (55)  |
| 10.28 SuperPath: Intrinsic Pathway For Apoptosis                                   | 3 (55)  |
| 10.28 SuperPath: MTOR Signalling                                                   | 3 (55)  |
| 10.2 SuperPath: Matrix Metalloproteinases                                          | 3 (56)  |
| 10.19 SuperPath: Osteopontin Signaling                                             | 2 (13)  |
| 10.17 SuperPath: Immune Response Fc Epsilon RI Pathway                             | 4 (129) |
| 10.17 SuperPath: RAC1 GTPase Cycle                                                 | 5 (225) |
| 10.13 SuperPath: CXCR4-mediated Signaling Events                                   | 3 (57)  |
| 10.09 SuperPath: 22q11.2 Copy Number Variation Syndrome                            | 4 (131) |
| 10.08 SuperPath: Autophagy Pathway                                                 | 5 (228) |
| 10.06 SuperPath: VEGF Pathway (Tocris)                                             | 3 (58)  |
| 10.06 SuperPath: MTOR Pathway                                                      | 3 (58)  |
| 10.06 SuperPath: Celecoxib Pathway, Pharmacodynamics                               | 3 (58)  |
| 9.98 SuperPath: S1P1 Pathway                                                       | 2 (14)  |
| 9.98 SuperPath: Trans-sulfuration Pathway                                          | 2 (14)  |

|                                                    |         |
|----------------------------------------------------|---------|
| 9.97 SuperPath: Signaling By NTRKs                 | 4 (134) |
| 9.97 SuperPath: Development FGFR Signaling Pathway | 4 (134) |
| 9.93 SuperPath: RAC2 GTPase Cycle                  | 4 (135) |
| 9.92 SuperPath: IL27-mediated Signaling Events     | 3 (60)  |
| 9.88 SuperPath: Activation of CAMP-Dependent PKA   | 8 (632) |



<YMJ Superpath>

| Score | Name                                                                             | # Matched Genes (Total Genes) |
|-------|----------------------------------------------------------------------------------|-------------------------------|
| 55.14 | SuperPath: Methylphenidate Pathway, Pharmacodynamics                             | 8 (18)                        |
| 44.26 | SuperPath: Neurotransmitter Clearance                                            | 6 (10)                        |
| 43.86 | SuperPath: Neuroscience                                                          | 13 (341)                      |
| 40.53 | SuperPath: Transmission Across Chemical Synapses                                 | 13 (410)                      |
| 34.6  | SuperPath: GPCR Downstream Signalling                                            | 14 (710)                      |
| 34.51 | SuperPath: Signal Transduction                                                   | 23 (2590)                     |
| 33.97 | SuperPath: Monoamine Transport                                                   | 6 (33)                        |
| 32.73 | SuperPath: Development Dopamine D2 Receptor Transactivation of EGFR              | 8 (128)                       |
| 31.7  | SuperPath: Monoamine GPCRs                                                       | 6 (43)                        |
| 28.98 | SuperPath: Alzheimer's Disease and MiRNA Effects                                 | 9 (266)                       |
| 27.62 | SuperPath: Ca, CAMP and Lipid Signaling                                          | 7 (126)                       |
| 25.34 | SuperPath: Sudden Infant Death Syndrome (SIDS) Susceptibility Pathways           | 7 (159)                       |
| 25.12 | SuperPath: Activation of NMDA Receptors and Postsynaptic Events                  | 6 (93)                        |
| 24.59 | SuperPath: AMP-activated Protein Kinase Signaling                                | 6 (99)                        |
| 23.86 | SuperPath: Interleukin-4 and Interleukin-13 Signaling                            | 6 (108)                       |
| 23.66 | SuperPath: Biogenic Amine Synthesis                                              | 4 (20)                        |
| 23.51 | SuperPath: Class A/1 (Rhodopsin-like Receptors)                                  | 10 (556)                      |
| 23.04 | SuperPath: Fragile X Syndrome                                                    | 6 (119)                       |
| 22.17 | SuperPath: GDNF Signaling                                                        | 6 (132)                       |
| 21.98 | SuperPath: Development Ligand-independent Activation of ESR1 and ESR2            | 6 (135)                       |
| 21.73 | SuperPath: Apoptosis and Survival_Anti-apoptotic Action of Nuclear ESR1 and ESR2 | 4 (28)                        |
| 21.27 | SuperPath: Development VEGF Signaling Via VEGFR2 - Generic Cascades              | 6 (147)                       |
| 20.47 | SuperPath: Nanog in Mammalian ESC Pluripotency                                   | 9 (534)                       |
| 20.46 | SuperPath: ACE Inhibitor Pathway, Pharmacodynamics                               | 4 (35)                        |
| 20.21 | SuperPath: Beta-2 Adrenergic-dependent CFTR Expression                           | 6 (167)                       |
| 20.11 | SuperPath: IL-9 Signaling Pathways                                               | 6 (169)                       |
| 19.56 | SuperPath: Common Pathways Underlying Drug Addiction                             | 4 (41)                        |
| 18.76 | SuperPath: Nuclear Receptors Meta-pathway                                        | 7 (315)                       |
| 18.66 | SuperPath: Photodynamic Therapy-induced NF-kB Survival Signaling                 | 4 (48)                        |
| 18.43 | SuperPath: IL-18 Signaling Pathway                                               | 4 (50)                        |
| 18.39 | SuperPath: Hepatocyte Growth Factor Receptor Signaling                           | 5 (115)                       |

|                                                                                                     |         |
|-----------------------------------------------------------------------------------------------------|---------|
| 18.38 SuperPath: RXR and RAR Heterodimerization With Other Nuclear Receptor                         | 3 (14)  |
| 18.31 SuperPath: G-protein Signaling G-Protein Alpha-i Signaling Cascades                           | 6 (210) |
| 18.23 SuperPath: Beta-Adrenergic Signaling                                                          | 7 (333) |
| 18.21 SuperPath: Phosphodiesterases in Neuronal Function                                            | 4 (52)  |
| 18.08 SuperPath: Etoposide Pathway, Pharmacokinetics/Pharmacodynamics                               | 3 (15)  |
| 17.97 SuperPath: G-Beta Gamma Signaling                                                             | 6 (219) |
| 17.69 SuperPath: ATF-2 Transcription Factor Network                                                 | 4 (57)  |
| 17.64 SuperPath: Dopamine-DARPP32 Feedback Onto CAMP Pathway                                        | 6 (228) |
| 17.5 SuperPath: Neuropathic Pain-Signaling in Dorsal Horn Neurons                                   | 6 (232) |
| 17.28 SuperPath: PI5P, PP2A and IER3 Regulate PI3K/AKT Signaling                                    | 5 (135) |
| 17.27 SuperPath: Signaling By Receptor Tyrosine Kinases                                             | 8 (524) |
| 17.21 SuperPath: Transcriptional Regulation By MECP2                                                | 4 (62)  |
| 17.17 SuperPath: CREB Pathway                                                                       | 8 (529) |
| 17.07 SuperPath: Overview of Nanoparticle Effects                                                   | 3 (19)  |
| 17.07 SuperPath: Cellular Roles of Anthrax Toxin                                                    | 3 (19)  |
| 17.03 SuperPath: Neuroinflammation and Glutamatergic Signaling                                      | 5 (140) |
| 16.71 SuperPath: P70S6K Signaling                                                                   | 7 (392) |
| 16.69 SuperPath: Neurophysiological Process Glutamate Regulation of Dopamine D1A Receptor Signaling | 4 (68)  |
| 16.44 SuperPath: Roles of Ceramides in Development of Insulin Resistance                            | 3 (22)  |
| 16.41 SuperPath: AMPK Enzyme Complex Pathway                                                        | 5 (153) |
| 16.25 SuperPath: MNAR-PELP1 and Estrogen Receptor Interaction                                       | 3 (23)  |
| 16.25 SuperPath: Estrogen Signaling Pathway                                                         | 3 (23)  |
| 16.14 SuperPath: Burn Wound Healing                                                                 | 4 (75)  |
| 16.1 SuperPath: Immune Response IL-23 Signaling Pathway                                             | 5 (160) |
| 16.07 SuperPath: Plasma Membrane Estrogen Receptor Signaling                                        | 3 (24)  |
| 15.93 SuperPath: Defective SLC6A3 Causes Parkinsonism-dystonia Infantile (PKDYS)                    | 2 (3)   |
| 15.89 SuperPath: Pathogenesis of ALS                                                                | 3 (25)  |
| 15.56 SuperPath: Ponatinib Pathway, Pharmacokinetics/Pharmacodynamics                               | 3 (27)  |
| 15.5 SuperPath: BAFF in B-Cell Signaling                                                            | 4 (84)  |
| 15.41 SuperPath: Selective Serotonin Reuptake Inhibitor Pathway, Pharmacodynamics                   | 3 (28)  |
| 15.41 SuperPath: Reelin Signaling Pathway                                                           | 3 (28)  |
| 15.18 SuperPath: Peptide Hormone Metabolism                                                         | 4 (89)  |
| 15.17 SuperPath: PIP3 Activates AKT Signaling                                                       | 6 (309) |
| 15.11 SuperPath: N-cadherin Signaling Events                                                        | 3 (30)  |

|                                                                                 |           |
|---------------------------------------------------------------------------------|-----------|
| 15.1 SuperPath: Aromatase Inhibitor Pathway (Breast Cell), Pharmacodynamics     | 2 (4)     |
| 14.93 SuperPath: Ceramide Pathway                                               | 4 (93)    |
| 14.78 SuperPath: Metabolism of Steroids                                         | 5 (194)   |
| 14.76 SuperPath: TGF-beta Signaling Pathways                                    | 4 (96)    |
| 14.58 SuperPath: Vitamin D-sensitive Calcium Signaling in Depression            | 3 (34)    |
| 14.54 SuperPath: Endometrial Cancer                                             | 5 (201)   |
| 14.53 SuperPath: GDNF-Family Ligands and Receptor Interactions                  | 4 (100)   |
| 14.47 SuperPath: GPCRs, Other                                                   | 4 (101)   |
| 14.22 SuperPath: LKB1 Signaling Events                                          | 3 (37)    |
| 13.94 SuperPath: Venlafaxine Pathway, Pharmacokinetics                          | 2 (6)     |
| 13.9 SuperPath: Gastrin Signaling Pathway                                       | 4 (112)   |
| 13.89 SuperPath: Unblocking of NMDA Receptors, Glutamate Binding and Activation | 3 (40)    |
| 13.85 SuperPath: Apoptotic Pathways in Synovial Fibroblasts                     | 8 (731)   |
| 13.71 SuperPath: T-cell Activation SARS-CoV-2                                   | 4 (116)   |
| 13.61 SuperPath: Calmodulin Induced Events                                      | 4 (118)   |
| 13.48 SuperPath: NO/cGMP/PKG Mediated Neuroprotection                           | 3 (44)    |
| 13.48 SuperPath: Interleukin-11 Signaling Pathway                               | 3 (44)    |
| 13.29 SuperPath: Nonalcoholic Fatty Liver Disease                               | 3 (46)    |
| 13.2 SuperPath: Statin Pathway - Generalized, Pharmacokinetics                  | 3 (47)    |
| 13.2 SuperPath: Immune Response CD16 Signaling in NK Cells                      | 4 (127)   |
| 13 SuperPath: Metabolism                                                        | 13 (2121) |
| 12.95 SuperPath: Gene Expression (Transcription)                                | 11 (1546) |
| 12.86 SuperPath: Non-genomic Actions of 1,25 Dihydroxyvitamin D3                | 3 (51)    |
| 12.77 SuperPath: Netrin-UNC5B Signaling Pathway                                 | 3 (52)    |
| 12.71 SuperPath: MTOR Signaling                                                 | 4 (139)   |
| 12.65 SuperPath: FMLP Pathway                                                   | 5 (266)   |
| 12.47 SuperPath: Vinka Alkaloid Pathway, Pharmacokinetics                       | 2 (10)    |
| 12.46 SuperPath: LT-BetaR Pathway                                               | 3 (56)    |
| 12.43 SuperPath: MAPK-Erk Pathway                                               | 5 (275)   |
| 12.33 SuperPath: CNTF Signaling                                                 | 4 (149)   |
| 12.25 SuperPath: Integrated Breast Cancer Pathway                               | 4 (151)   |
| 12.2 SuperPath: Orexin Receptor Pathway                                         | 2 (11)    |
| 11.97 SuperPath: Nuclear Receptors                                              | 3 (63)    |
| 11.97 SuperPath: Immune Response_IFN Gamma Signaling Pathway                    | 3 (63)    |

|                                                                                                      |         |
|------------------------------------------------------------------------------------------------------|---------|
| 11.97 SuperPath: Autophagy                                                                           | 3 (63)  |
| 11.95 SuperPath: Cell-type Dependent Selectivity of CCK2R Signaling                                  | 2 (12)  |
| 11.95 SuperPath: Sympathetic Nerve Pathway (Pre- and Post- Ganglionic Junction)                      | 2 (12)  |
| 11.95 SuperPath: Methionine Degradation                                                              | 2 (12)  |
| 11.9 SuperPath: ESR-mediated Signaling                                                               | 5 (298) |
| 11.77 SuperPath: Colorectal Cancer Metastasis                                                        | 4 (165) |
| 11.72 SuperPath: MIF Mediated Glucocorticoid Regulation                                              | 7 (681) |
| 11.7 SuperPath: Glucose / Energy Metabolism                                                          | 5 (307) |
| 11.61 SuperPath: TNF Superfamily - Human Ligand-Receptor Interactions and Their Associated Functions | 4 (170) |
| 11.52 SuperPath: Development EGFR Signaling Via Small GTPases                                        | 3 (70)  |
| 11.52 SuperPath: Signaling By ERBB4                                                                  | 3 (70)  |
| 11.34 SuperPath: GPCR Pathway                                                                        | 7 (712) |
| 11.31 SuperPath: Methionine Metabolism                                                               | 2 (15)  |
| 11.31 SuperPath: Lamotrigine Pathway, Pharmacokinetics and Pharmacodynamics                          | 2 (15)  |
| 11.29 SuperPath: Translation Translation Regulation By Alpha-1 Adrenergic Receptors                  | 3 (74)  |
| 11.23 SuperPath: Development EPO-induced Jak-STAT Pathway                                            | 3 (75)  |
| 11.23 SuperPath: Acute Viral Myocarditis                                                             | 3 (75)  |
| 11.21 SuperPath: Translation Insulin Regulation of Translation                                       | 4 (183) |
| 11.12 SuperPath: Ethanol Degradation II                                                              | 2 (16)  |
| 11.12 SuperPath: LDL Oxidation in Atherogenesis                                                      | 2 (16)  |
| 11.12 SuperPath: SREBF and MiR33 in Cholesterol and Lipid Homeostasis                                | 2 (16)  |
| 11.12 SuperPath: Cytokine Signaling in Immune System                                                 | 7 (730) |
| 11.01 SuperPath: TNFR1 Pathway                                                                       | 4 (190) |
| 10.95 SuperPath: Drug Induction of Bile Acid Pathway                                                 | 2 (17)  |
| 10.79 SuperPath: Tyrosine Metabolism P.1 (dopamine)                                                  | 2 (18)  |
| 10.79 SuperPath: Nongenotropic Androgen Signaling                                                    | 2 (18)  |
| 10.76 SuperPath: Breast Cancer Pathway                                                               | 4 (199) |
| 10.66 SuperPath: Regulation of Actin Dynamics For Phagocytic Cup Formation                           | 3 (86)  |
| 10.61 SuperPath: Insulin Receptor Signalling Cascade                                                 | 3 (87)  |
| 10.61 SuperPath: Development A2A Receptor Signaling                                                  | 3 (87)  |
| 10.49 SuperPath: Cannabinoid Receptor Signaling                                                      | 2 (20)  |
| 10.49 SuperPath: Hematopoietic Stem Cell Gene Regulation By GABP Alpha/beta Complex                  | 2 (20)  |
| 10.49 SuperPath: Thyroxine (thyroid Hormone) Production                                              | 2 (20)  |
| 10.49 SuperPath: Serotonin and Anxiety                                                               | 2 (20)  |

|                                                                                                                |           |
|----------------------------------------------------------------------------------------------------------------|-----------|
| 10.49 SuperPath: Antipsychotics Pathway (Metabolic Side Effects), Pharmacodynamics                             | 2 (20)    |
| 10.35 SuperPath: PKC-gamma Calcium Signaling Pathway in Ataxia                                                 | 2 (21)    |
| 10.35 SuperPath: Host-pathogen Interaction of Human Coronaviruses - Apoptosis                                  | 2 (21)    |
| 10.35 SuperPath: MFAP5 Effect on Permeability and Motility of Endothelial Cells Via Cytoskeleton Rearrangement | 2 (21)    |
| 10.35 SuperPath: MTHFR Deficiency                                                                              | 2 (21)    |
| 10.22 SuperPath: Type II Diabetes Mellitus                                                                     | 2 (22)    |
| 10.21 SuperPath: CCL18 Signaling Pathway                                                                       | 3 (96)    |
| 10.21 SuperPath: Small Cell Lung Cancer                                                                        | 3 (96)    |
| 10.15 SuperPath: PI3K-Akt Signaling Pathway                                                                    | 5 (390)   |
| 10.1 SuperPath: Development Angiotensin Activation of ERK                                                      | 4 (225)   |
| 10.09 SuperPath: A-beta Plaque Formation and APP Metabolism                                                    | 2 (23)    |
| 10.09 SuperPath: Epstein-Barr Virus LMP1 Signaling                                                             | 2 (23)    |
| 10.09 SuperPath: Gemtuzumab Ozogamicin Pathway, Pharmacokinetics/Pharmacodynamics                              | 2 (23)    |
| 10.09 SuperPath: Sympathetic Nerve Pathway (Neuroeffector Junction)                                            | 2 (23)    |
| 10.08 SuperPath: Immune Response Antigen Presentation By MHC Class II                                          | 3 (99)    |
| 10.03 SuperPath: Autophagy Pathway                                                                             | 4 (228)   |
| 10 SuperPath: Toll Comparative Pathway                                                                         | 3 (101)   |
| 9.97 SuperPath: Signaling By Overexpressed Wild-Type EGFR in Cancer                                            | 2 (24)    |
| 9.97 SuperPath: Metabolism of Proteins                                                                         | 11 (1970) |
| 9.96 SuperPath: DNA Damage Response (only ATM Dependent)                                                       | 3 (102)   |
| 9.88 SuperPath: Blood-Brain Barrier and Immune Cell Transmigration: VCAM-1/CD106 Signaling                     | 3 (104)   |
| 9.85 SuperPath: Role of Phospholipids in Phagocytosis                                                          | 2 (25)    |
| 9.84 SuperPath: Senescence and Autophagy in Cancer                                                             | 3 (105)   |
| 9.8 SuperPath: TCR Signaling (Qiagen)                                                                          | 4 (238)   |
| 9.78 SuperPath: Response to Elevated Platelet Cytosolic Ca <sup>2+</sup>                                       | 6 (621)   |
| 9.72 SuperPath: IL-17 Family Signaling Pathways                                                                | 3 (108)   |
| 9.69 SuperPath: ADORA2B Mediated Anti-inflammatory Cytokines Production                                        | 5 (419)   |
| 9.63 SuperPath: Response of Mtb to Phagocytosis                                                                | 2 (27)    |
| 9.63 SuperPath: IL-15 Signaling and Its Primary Biological Effects in Different Immune Cell Types              | 2 (27)    |

**<Common target Superpath>**

| <b>Score</b> | <b>Name</b>                                                            | <b># Matched Genes (Total Genes)</b> |
|--------------|------------------------------------------------------------------------|--------------------------------------|
| 56.55        | SuperPath: Methylphenidate Pathway, Pharmacodynamics                   | 8 (18)                               |
| 45.29        | SuperPath: Neurotransmitter Clearance                                  | 6 (10)                               |
| 36.48        | SuperPath: Neuroscience                                                | 11 (341)                             |
| 35.61        | SuperPath: Signal Transduction                                         | 22 (2590)                            |
| 34.99        | SuperPath: Monoamine Transport                                         | 6 (33)                               |
| 33.67        | SuperPath: Transmission Across Chemical Synapses                       | 11 (410)                             |
| 33.06        | SuperPath: GPCR Downstream Signalling                                  | 13 (710)                             |
| 32.72        | SuperPath: Monoamine GPCRs                                             | 6 (43)                               |
| 28.81        | SuperPath: Ca, CAMP and Lipid Signaling                                | 7 (126)                              |
| 28.65        | SuperPath: Development Dopamine D2 Receptor Transactivation of EGFR    | 7 (128)                              |
| 25.18        | SuperPath: Class A/1 (Rhodopsin-like Receptors)                        | 10 (556)                             |
| 24.87        | SuperPath: Interleukin-4 and Interleukin-13 Signaling                  | 6 (108)                              |
| 24.32        | SuperPath: Biogenic Amine Synthesis                                    | 4 (20)                               |
| 21.61        | SuperPath: Sudden Infant Death Syndrome (SIDS) Susceptibility Pathways | 6 (159)                              |
| 21.51        | SuperPath: Alzheimer's Disease and MiRNA Effects                       | 7 (266)                              |
| 21.2         | SuperPath: Beta-2 Adrenergic-dependent CFTR Expression                 | 6 (167)                              |
| 19.9         | SuperPath: Nuclear Receptors Meta-pathway                              | 7 (315)                              |
| 18.98        | SuperPath: Fragile X Syndrome                                          | 5 (119)                              |
| 18.88        | SuperPath: RXR and RAR Heterodimerization With Other Nuclear Receptor  | 3 (14)                               |
| 18.87        | SuperPath: Phosphodiesterases in Neuronal Function                     | 4 (52)                               |
| 18.61        | SuperPath: Dopamine-DARPP32 Feedback Onto CAMP Pathway                 | 6 (228)                              |
| 18.58        | SuperPath: Etoposide Pathway, Pharmacokinetics/Pharmacodynamics        | 3 (15)                               |
| 18.35        | SuperPath: ATF-2 Transcription Factor Network                          | 4 (57)                               |
| 18.25        | SuperPath: GDNF Signaling                                              | 5 (132)                              |
| 18.1         | SuperPath: Development Ligand-independent Activation of ESR1 and ESR2  | 5 (135)                              |
| 17.87        | SuperPath: Transcriptional Regulation By MECP2                         | 4 (62)                               |
| 17.56        | SuperPath: Overview of Nanoparticle Effects                            | 3 (19)                               |
| 17.56        | SuperPath: Cellular Roles of Anthrax Toxin                             | 3 (19)                               |
| 17.5         | SuperPath: Development VEGF Signaling Via VEGFR2 - Generic Cascades    | 5 (147)                              |

|                                                                                                     |           |
|-----------------------------------------------------------------------------------------------------|-----------|
| 17.35 SuperPath: Neurophysiological Process Glutamate Regulation of Dopamine D1A Receptor Signaling | 4 (68)    |
| 17.23 SuperPath: AMPK Enzyme Complex Pathway                                                        | 5 (153)   |
| 16.93 SuperPath: Roles of Ceramides in Development of Insulin Resistance                            | 3 (22)    |
| 16.79 SuperPath: Burn Wound Healing                                                                 | 4 (75)    |
| 16.56 SuperPath: Plasma Membrane Estrogen Receptor Signaling                                        | 3 (24)    |
| 16.54 SuperPath: IL-9 Signaling Pathways                                                            | 5 (169)   |
| 16.39 SuperPath: Pathogenesis of ALS                                                                | 3 (25)    |
| 16.26 SuperPath: Defective SLC6A3 Causes Parkinsonism-dystonia Infantile (PKDYS)                    | 2 (3)     |
| 15.9 SuperPath: Selective Serotonin Reuptake Inhibitor Pathway, Pharmacodynamics                    | 3 (28)    |
| 15.9 SuperPath: Apoptosis and Survival_Anti-apoptotic Action of Nuclear ESR1 and ESR2               | 3 (28)    |
| 15.83 SuperPath: Peptide Hormone Metabolism                                                         | 4 (89)    |
| 15.6 SuperPath: N-cadherin Signaling Events                                                         | 3 (30)    |
| 15.59 SuperPath: Metabolism of Steroids                                                             | 5 (194)   |
| 15.58 SuperPath: Activation of NMDA Receptors and Postsynaptic Events                               | 4 (93)    |
| 15.43 SuperPath: Aromatase Inhibitor Pathway (Breast Cell), Pharmacodynamics                        | 2 (4)     |
| 15.23 SuperPath: AMP-activated Protein Kinase Signaling                                             | 4 (99)    |
| 15.13 SuperPath: Signaling By Receptor Tyrosine Kinases                                             | 7 (524)   |
| 15.12 SuperPath: GPCRs, Other                                                                       | 4 (101)   |
| 15.07 SuperPath: Vitamin D-sensitive Calcium Signaling in Depression                                | 3 (34)    |
| 15.05 SuperPath: CREB Pathway                                                                       | 7 (529)   |
| 15.04 SuperPath: G-protein Signaling G-Protein Alpha-i Signaling Cascades                           | 5 (210)   |
| 14.96 SuperPath: Nanog in Mammalian ESC Pluripotency                                                | 7 (534)   |
| 14.95 SuperPath: ACE Inhibitor Pathway, Pharmacodynamics                                            | 3 (35)    |
| 14.87 SuperPath: Metabolism                                                                         | 13 (2121) |
| 14.76 SuperPath: G-Beta Gamma Signaling                                                             | 5 (219)   |
| 14.4 SuperPath: Hepatocyte Growth Factor Receptor Signaling                                         | 4 (115)   |
| 14.38 SuperPath: Unblocking of NMDA Receptors, Glutamate Binding and Activation                     | 3 (40)    |
| 14.37 SuperPath: Neuropathic Pain-Signaling in Dorsal Horn Neurons                                  | 5 (232)   |
| 14.27 SuperPath: Common Pathways Underlying Drug Addiction                                          | 3 (41)    |
| 14.26 SuperPath: Venlafaxine Pathway, Pharmacokinetics                                              | 2 (6)     |
| 14.22 SuperPath: P70S6K Signaling                                                                   | 6 (392)   |
| 13.97 SuperPath: NO/cGMP/PKG Mediated Neuroprotection                                               | 3 (44)    |

|                                                                                    |         |
|------------------------------------------------------------------------------------|---------|
| 13.78 SuperPath: Nonalcoholic Fatty Liver Disease                                  | 3 (46)  |
| 13.69 SuperPath: Statin Pathway - Generalized, Pharmacokinetics                    | 3 (47)  |
| 13.6 SuperPath: Photodynamic Therapy-induced NF-kB Survival Signaling              | 3 (48)  |
| 13.51 SuperPath: PI5P, PP2A and IER3 Regulate PI3K/AKT Signaling                   | 4 (135) |
| 13.43 SuperPath: IL-18 Signaling Pathway                                           | 3 (50)  |
| 13.31 SuperPath: Neuroinflammation and Glutamatergic Signaling                     | 4 (140) |
| 12.8 SuperPath: Vinka Alkaloid Pathway, Pharmacokinetics                           | 2 (10)  |
| 12.57 SuperPath: Immune Response IL-23 Signaling Pathway                           | 4 (160) |
| 12.48 SuperPath: Glucose / Energy Metabolism                                       | 5 (307) |
| 12.45 SuperPath: Nuclear Receptors                                                 | 3 (63)  |
| 12.45 SuperPath: Autophagy                                                         | 3 (63)  |
| 12.44 SuperPath: PIP3 Activates AKT Signaling                                      | 5 (309) |
| 12.27 SuperPath: Methionine Degradation                                            | 2 (12)  |
| 12.27 SuperPath: Sympathetic Nerve Pathway (Pre- and Post- Ganglionic Junction)    | 2 (12)  |
| 12.27 SuperPath: Cell-type Dependent Selectivity of CCK2R Signaling                | 2 (12)  |
| 12.01 SuperPath: Signaling By ERBB4                                                | 3 (70)  |
| 11.94 SuperPath: Beta-Adrenergic Signaling                                         | 5 (333) |
| 11.63 SuperPath: Lamotrigine Pathway, Pharmacokinetics and Pharmacodynamics        | 2 (15)  |
| 11.45 SuperPath: Ethanol Degradation II                                            | 2 (16)  |
| 11.45 SuperPath: LDL Oxidation in Atherogenesis                                    | 2 (16)  |
| 11.45 SuperPath: SREBF and MiR33 in Cholesterol and Lipid Homeostasis              | 2 (16)  |
| 11.33 SuperPath: Endometrial Cancer                                                | 4 (201) |
| 11.28 SuperPath: Drug Induction of Bile Acid Pathway                               | 2 (17)  |
| 11.24 SuperPath: BAFF in B-Cell Signaling                                          | 3 (84)  |
| 11.11 SuperPath: Tyrosine Metabolism P.1 (dopamine)                                | 2 (18)  |
| 10.82 SuperPath: Ceramide Pathway                                                  | 3 (93)  |
| 10.81 SuperPath: Antipsychotics Pathway (Metabolic Side Effects), Pharmacodynamics | 2 (20)  |
| 10.81 SuperPath: Cannabinoid Receptor Signaling                                    | 2 (20)  |
| 10.81 SuperPath: Serotonin and Anxiety                                             | 2 (20)  |
| 10.68 SuperPath: TGF-beta Signaling Pathways                                       | 3 (96)  |
| 10.68 SuperPath: Small Cell Lung Cancer                                            | 3 (96)  |
| 10.67 SuperPath: Host-pathogen Interaction of Human Coronaviruses - Apoptosis      | 2 (21)  |



|                                                                                                    |          |
|----------------------------------------------------------------------------------------------------|----------|
| 10.67 SuperPath: PKC-gamma Calcium Signaling Pathway in Ataxia                                     | 2 (21)   |
| 10.65 SuperPath: Autophagy Pathway                                                                 | 4 (228)  |
| 10.51 SuperPath: GDNF-Family Ligands and Receptor Interactions                                     | 3 (100)  |
| 10.41 SuperPath: A-beta Plaque Formation and APP Metabolism                                        | 2 (23)   |
| 10.41 SuperPath: Sympathetic Nerve Pathway (Neuroeffector Junction)                                | 2 (23)   |
| 10.41 SuperPath: Gemtuzumab Ozogamicin Pathway, Pharmacokinetics/Pharmacodynamics                  | 2 (23)   |
| 10.41 SuperPath: Estrogen Signaling Pathway                                                        | 2 (23)   |
| 10.41 SuperPath: MNAR-PELP1 and Estrogen Receptor Interaction                                      | 2 (23)   |
| 10.35 SuperPath: Blood-Brain Barrier and Immune Cell Transmigration: VCAM-1/CD106 Signaling        | 3 (104)  |
| 10.18 SuperPath: Role of Phospholipids in Phagocytosis                                             | 2 (25)   |
| 9.96 SuperPath: IL-15 Signaling and Its Primary Biological Effects in Different Immune Cell Types  | 2 (27)   |
| 9.96 SuperPath: MIF Mediated Glucocorticoid Regulation                                             | 6 (681)  |
| 9.94 SuperPath: Gene Expression (Transcription)                                                    | 9 (1546) |
| 9.9 SuperPath: T-cell Activation SARS-CoV-2                                                        | 3 (116)  |
| 9.85 SuperPath: Reelin Signaling Pathway                                                           | 2 (28)   |
| 9.85 SuperPath: Synthesis of PC                                                                    | 2 (28)   |
| 9.85 SuperPath: Anti-diabetic Drug Potassium Channel Inhibitors Pathway, Pharmacodynamics          | 2 (28)   |
| 9.83 SuperPath: Calmodulin Induced Events                                                          | 3 (118)  |
| 9.83 SuperPath: FMLP Pathway                                                                       | 4 (266)  |
| 9.75 SuperPath: Amb2 Integrin Signaling                                                            | 2 (29)   |
| 9.75 SuperPath: NNOS Signaling at Neuronal Synapses                                                | 2 (29)   |
| 9.69 SuperPath: Drug ADME                                                                          | 3 (122)  |
| 9.66 SuperPath: Aryl Hydrocarbon Receptor Pathway                                                  | 2 (30)   |
| 9.65 SuperPath: MAPK-Erk Pathway                                                                   | 4 (275)  |
| 9.64 SuperPath: GPCR Pathway                                                                       | 6 (712)  |
| 9.56 SuperPath: Statin Inhibition of Cholesterol Production                                        | 2 (31)   |
| 9.56 SuperPath: Trafficking of AMPA Receptors                                                      | 2 (31)   |
| 9.53 SuperPath: Immune Response CD16 Signaling in NK Cells                                         | 3 (127)  |
| 9.47 SuperPath: Mammary Gland Development Pathway - Pregnancy and Lactation (Stage 3 of 4)         | 2 (32)   |
| 9.47 SuperPath: 14-3-3 and Regulation of BAD Activity                                              | 2 (32)   |
| 9.47 SuperPath: Antigen Activates B Cell Receptor (BCR) Leading to Generation of Second Messengers | 2 (32)   |
| 9.45 SuperPath: Cytokine Signaling in Immune System                                                | 6 (730)  |

9.44 SuperPath: Apoptotic Pathways in Synovial Fibroblasts  
9.42 SuperPath: Metabolism of Proteins  
9.4 SuperPath: 22q11.2 Copy Number Variation Syndrome

6 (731)  
10 (1970)  
3 (131)

## Supplementary 3

<GGT Organs>

| Name                      | Enrichment ratio | Observed | Expected    | P-value     | FDR         |   |
|---------------------------|------------------|----------|-------------|-------------|-------------|---|
| peripheral nerves         | 2.381216833      | 51       | 21.41762115 | 1.71423E-12 | 2.14279E-10 | ↑ |
| brain                     | 1.656282414      | 68       | 41.05580029 | 8.78445E-12 | 5.49028E-10 | ↑ |
| head                      | 1.524664251      | 70       | 45.91174743 | 1.10935E-10 | 3.7322E-09  | ↑ |
| heart                     | 2.10362485       | 52       | 24.71923642 | 1.1943E-10  | 3.7322E-09  | ↑ |
| spinal cord               | 2.509707691      | 41       | 16.33656388 | 6.78516E-10 | 1.41358E-08 | ↑ |
| liver                     | 2.410679004      | 43       | 17.83729809 | 6.16555E-10 | 1.41358E-08 | ↑ |
| lung                      | 2.246718784      | 46       | 20.4743025  | 8.03627E-10 | 1.43505E-08 | ↑ |
| peripheral nervous system | 1.930592181      | 53       | 27.45271659 | 2.0458E-09  | 3.19657E-08 | ↑ |
| pancreas                  | 3.080834585      | 25       | 8.114684288 | 2.22118E-07 | 3.08497E-06 | ↑ |
| kidney                    | 1.918064268      | 44       | 22.93979442 | 4.47199E-07 | 5.54253E-06 | ↑ |
| bone marrow               | 2.853505238      | 26       | 9.111600587 | 4.87742E-07 | 5.54253E-06 | ↑ |
| skin                      | 1.661931622      | 53       | 31.89060206 | 6.84323E-07 | 7.12837E-06 | ↑ |
| small intestine           | 2.625180698      | 28       | 10.66593245 | 7.47752E-07 | 7.18992E-06 | ↑ |
| esophagus                 | 2.662544528      | 27       | 10.14067548 | 1.0041E-06  | 8.96518E-06 | ↑ |
| intestine                 | 2.159436834      | 35       | 16.20792952 | 1.3768E-06  | 1.14733E-05 | ↑ |
| blood vessels             | 1.71073948       | 49       | 28.64258443 | 1.62644E-06 | 1.2699E-05  | ↑ |
| large intestine           | 2.278782809      | 32       | 14.04258443 | 1.72706E-06 | 1.2699E-05  | ↑ |
| upper limb                | 1.857791461      | 42       | 22.60748899 | 2.81971E-06 | 1.95813E-05 | ↑ |
| rectum                    | 2.906981257      | 22       | 7.567988253 | 4.02079E-06 | 2.64525E-05 | ↑ |
| stomach                   | 2.253325392      | 30       | 13.31365639 | 5.68331E-06 | 3.55207E-05 | ↑ |
| eye                       | 1.659409465      | 46       | 27.72070485 | 1.43499E-05 | 8.5416E-05  | ↑ |
| mouth                     | 1.765140421      | 40       | 22.66108664 | 2.38823E-05 | 0.000135695 | ↑ |
| lower limb                | 1.730676254      | 41       | 23.69016153 | 2.7582E-05  | 0.000149902 | ↑ |
| spleen                    | 2.707914985      | 20       | 7.385756241 | 3.47209E-05 | 0.000180838 | ↑ |
| hand                      | 1.811886528      | 37       | 20.42070485 | 3.68869E-05 | 0.000184435 | ↑ |
| foot                      | 1.776908023      | 38       | 21.38546256 | 4.09879E-05 | 0.000186925 | ↑ |

|                    |             |    |             |             |             |   |
|--------------------|-------------|----|-------------|-------------|-------------|---|
| toes               | 1.864687889 | 35 | 18.76989721 | 3.92888E-05 | 0.000186925 | ↑ |
| forearm            | 2.171350968 | 27 | 12.43465492 | 4.18713E-05 | 0.000186925 | ↑ |
| arm                | 2.109898865 | 28 | 13.27077827 | 4.6505E-05  | 0.000200452 | ↑ |
| digit              | 1.818276212 | 36 | 19.7989721  | 4.81994E-05 | 0.000200831 | ↑ |
| wrist              | 2.049501868 | 29 | 14.14977974 | 5.34153E-05 | 0.000215384 | ↑ |
| chest wall         | 2.091999272 | 27 | 12.90631424 | 7.93202E-05 | 0.000309845 | ↑ |
| breast             | 2.245641033 | 24 | 10.68737151 | 8.21637E-05 | 0.000311226 | ↑ |
| prostate           | 2.403731406 | 21 | 8.736417034 | 0.000109233 | 0.000401591 | ↑ |
| coagulation system | 2.256168705 | 23 | 10.19427313 | 0.000115131 | 0.000411184 | ↑ |
| neck               | 1.84956969  | 32 | 17.30132159 | 0.000128351 | 0.000417344 | ↑ |
| elbow              | 1.989379128 | 28 | 14.07474302 | 0.000130211 | 0.000417344 | ↑ |
| shoulder           | 1.954727215 | 29 | 14.83582966 | 0.000125264 | 0.000417344 | ↑ |
| red blood cells    | 2.249073835 | 23 | 10.22643172 | 0.000120569 | 0.000417344 | ↑ |
| anus               | 3.035390604 | 15 | 4.941703377 | 0.000137158 | 0.000428618 | ↑ |
| knee               | 1.949294623 | 28 | 14.36417034 | 0.000184279 | 0.00056071  | ↑ |
| fingers            | 1.757219292 | 34 | 19.34875184 | 0.000188399 | 0.00056071  | ↑ |
| ankle              | 1.934855403 | 28 | 14.47136564 | 0.000208953 | 0.000585936 | ↑ |
| hip                | 1.934855403 | 28 | 14.47136564 | 0.000208953 | 0.000585936 | ↑ |
| shin               | 2.060240089 | 25 | 12.13450808 | 0.000210937 | 0.000585936 | ↑ |
| scapula            | 2.126478135 | 23 | 10.81600587 | 0.000270372 | 0.000732735 | ↑ |
| thigh              | 2.024472032 | 25 | 12.34889868 | 0.000275508 | 0.000732735 | ↑ |
| clavicle           | 2.043444227 | 23 | 11.25550661 | 0.000472241 | 0.001229793 |   |
| sternum            | 2.03568922  | 23 | 11.29838473 | 0.000497702 | 0.001269648 |   |
| humerus            | 2.014663322 | 23 | 11.41629956 | 0.00057406  | 0.00143515  |   |
| fibula             | 2.05438315  | 22 | 10.70881057 | 0.000612979 | 0.001499727 |   |
| rib                | 1.999642533 | 23 | 11.5020558  | 0.000635884 | 0.001499727 |   |
| rib cage           | 1.999642533 | 23 | 11.5020558  | 0.000635884 | 0.001499727 |   |
| tibia              | 2.027992853 | 22 | 10.84816446 | 0.000726302 | 0.001681255 |   |
| gallbladder        | 3.547059743 | 10 | 2.819236417 | 0.000800365 | 0.001819011 |   |
| spinal column      | 1.80556783  | 27 | 14.95374449 | 0.000857632 | 0.001887104 |   |

|                   |             |    |             |             |             |
|-------------------|-------------|----|-------------|-------------|-------------|
| vertebrae         | 1.837484433 | 26 | 14.14977974 | 0.000866972 | 0.001887104 |
| urinary bladder   | 2.411312988 | 16 | 6.635389134 | 0.000875616 | 0.001887104 |
| ulna              | 1.988690666 | 22 | 11.06255507 | 0.000936395 | 0.001983887 |
| pelvis            | 1.808709509 | 26 | 14.37488987 | 0.001094242 | 0.002260444 |
| meninges          | 2.575990922 | 14 | 5.434801762 | 0.001103097 | 0.002260444 |
| radius            | 1.954598826 | 22 | 11.25550661 | 0.001168853 | 0.002356559 |
| maxilla           | 1.70576448  | 29 | 17.00117474 | 0.001245312 | 0.002470858 |
| mandible          | 1.695076733 | 29 | 17.10837004 | 0.001376221 | 0.002684974 |
| white blood cells | 1.623276498 | 32 | 19.71321586 | 0.001396186 | 0.002684974 |
| femur             | 1.921656149 | 22 | 11.44845815 | 0.001449819 | 0.002745869 |
| jaws              | 1.672028718 | 29 | 17.34419971 | 0.001707629 | 0.003185875 |
| skull             | 1.514820101 | 36 | 23.76519824 | 0.002049734 | 0.003767894 |
| face              | 1.563753525 | 32 | 20.46358297 | 0.002627691 | 0.004760309 |
| abdominal wall    | 2.240184215 | 14 | 6.24948605  | 0.00367208  | 0.006557285 |
| tongue            | 2.39199157  | 12 | 5.016740088 | 0.004607781 | 0.008112291 |
| diaphragm         | 2.672999176 | 10 | 3.741116006 | 0.005075078 | 0.008810899 |
| biliary tract     | 2.665362035 | 10 | 3.751835536 | 0.005165672 | 0.008845329 |
| bronchus          | 2.650217933 | 10 | 3.773274596 | 0.0053506   | 0.009038176 |
| adrenal gland     | 2.562848111 | 10 | 3.901908957 | 0.006569627 | 0.010949379 |
| lymph nodes       | 2.541898399 | 10 | 3.934067548 | 0.006905161 | 0.011357172 |
| blood             | 1.370843699 | 39 | 28.44963289 | 0.007775177 | 0.01262204  |
| thymus            | 4.021020312 | 5  | 1.243465492 | 0.015213536 | 0.024380666 |
| pharynx           | 1.883136221 | 13 | 6.903377386 | 0.018436816 | 0.029172177 |
| testis            | 1.609950223 | 18 | 11.1804699  | 0.023045243 | 0.036008192 |
| eyelid            | 1.566397465 | 18 | 11.49133627 | 0.029155271 | 0.044992702 |
| cerebellum        | 1.48311083  | 20 | 13.48516887 | 0.035501591 | 0.054118278 |
| cranial nerves    | 1.390692773 | 25 | 17.97665198 | 0.036947932 | 0.055644476 |
| placenta          | 2.322514637 | 6  | 2.583406755 | 0.05013143  | 0.074600342 |
| heart valve       | 2.092992624 | 7  | 3.344493392 | 0.051792473 | 0.075279758 |
| salivary gland    | 2.30339929  | 6  | 2.604845815 | 0.051494388 | 0.075279758 |

|                     |             |    |             |             |             |
|---------------------|-------------|----|-------------|-------------|-------------|
| sweat gland         | 1.943493151 | 8  | 4.116299559 | 0.052711044 | 0.075734258 |
| uterus              | 1.560367261 | 14 | 8.972246696 | 0.053871159 | 0.076521533 |
| thyroid             | 2.229984173 | 6  | 2.690602056 | 0.057158111 | 0.080278245 |
| penis               | 1.561299937 | 12 | 7.685903084 | 0.071155597 | 0.098827219 |
| teeth               | 1.552638079 | 12 | 7.728781204 | 0.073365928 | 0.100777373 |
| cheek               | 1.652734333 | 9  | 5.445521292 | 0.085103274 | 0.114386121 |
| nails               | 1.655994164 | 9  | 5.434801762 | 0.084386334 | 0.114386121 |
| duodenum            | 1.911632607 | 5  | 2.615565345 | 0.118650064 | 0.15777934  |
| lacrimal apparatus  | 2.717116638 | 3  | 1.104111601 | 0.126686579 | 0.166692867 |
| ovary               | 1.424239255 | 10 | 7.021292217 | 0.141115449 | 0.179994195 |
| nose                | 1.285162408 | 17 | 13.22790015 | 0.139120743 | 0.179994195 |
| larynx              | 1.510731518 | 8  | 5.295447871 | 0.140141209 | 0.179994195 |
| trachea             | 1.702329767 | 5  | 2.937151248 | 0.15683367  | 0.196042087 |
| vocal cords         | 1.594661047 | 6  | 3.762555066 | 0.156006203 | 0.196042087 |
| ear                 | 1.235598294 | 18 | 14.56784141 | 0.1681863   | 0.208151361 |
| sinuses             | 2.057816277 | 3  | 1.457856094 | 0.18350595  | 0.224884743 |
| ureter              | 1.371877518 | 8  | 5.831424376 | 0.195590462 | 0.237367066 |
| urethra             | 1.450067428 | 6  | 4.13773862  | 0.201813363 | 0.240254004 |
| cerebrospinal fluid | 1.529306086 | 5  | 3.269456681 | 0.200886131 | 0.240254004 |
| pituitary gland     | 1.369001465 | 7  | 5.113215859 | 0.214619813 | 0.25072408  |
| parathyroid         | 2.743755036 | 2  | 0.728928047 | 0.214224274 | 0.25072408  |
| appendix            | 0           | 0  | 0.246549192 | 0.219861344 | 0.254469148 |
| epiglottis          | 1.675826429 | 3  | 1.790161527 | 0.240021302 | 0.275253787 |
| lips                | 1.205007594 | 12 | 9.958443465 | 0.250007561 | 0.284099501 |
| chin                | 1.222643135 | 10 | 8.179001468 | 0.257201051 | 0.289640823 |
| aorta               | 1.313910862 | 3  | 2.283259912 | 0.329356502 | 0.367585381 |
| hypothalamus        | 1.260644206 | 2  | 1.586490455 | 0.374778817 | 0.414578338 |
| middle ear          | 1.099658207 | 6  | 5.456240822 | 0.39252034  | 0.430395109 |
| outer ear           | 0.586100552 | 6  | 10.23715125 | 0.071259135 | 1           |
| inner ear           | 0.64558942  | 2  | 3.0979442   | 0.286156549 | 1           |

|                |             |    |             |             |   |
|----------------|-------------|----|-------------|-------------|---|
| vagina         | 0.929160072 | 5  | 5.381204112 | 0.456603686 | 1 |
| vulva          | 0.251449249 | 1  | 3.976945668 | 0.05121321  | 1 |
| hair           | 0.943165794 | 11 | 11.66284875 | 0.42992786  | 1 |
| olfactory bulb | 0           | 0  | 1.682966226 | 0.090266464 | 1 |
| forehead       | 0.547462859 | 5  | 9.133039648 | 0.065670986 | 1 |
| scalp          | 0.88007237  | 2  | 2.272540382 | 0.466393856 | 1 |
| lymph vessels  | 0           | 0  | 0.836123348 | 0.214681616 | 1 |
| fallopian tube | 0.701411062 | 1  | 1.425697504 | 0.407973224 | 1 |
| vas deferens   | 0           | 0  | 1.211306902 | 0.146434826 | 1 |

<Banhasasim-tang Organs>

| Name                      | Enrichment ratio | Observed | Expected    | P-value     | FDR         |   |
|---------------------------|------------------|----------|-------------|-------------|-------------|---|
| brain                     | 1.680639508      | 69       | 41.05580029 | 9.80401E-13 | 1.07139E-10 | ↑ |
| peripheral nerves         | 2.381216833      | 51       | 21.41762115 | 1.71423E-12 | 1.07139E-10 | ↑ |
| head                      | 1.524664251      | 70       | 45.91174743 | 1.10935E-10 | 4.6223E-09  | ↑ |
| spinal cord               | 2.509707691      | 41       | 16.33656388 | 6.78516E-10 | 1.67422E-08 | ↑ |
| heart                     | 2.063170526      | 51       | 24.71923642 | 6.26126E-10 | 1.67422E-08 | ↑ |
| lung                      | 2.246718784      | 46       | 20.4743025  | 8.03627E-10 | 1.67422E-08 | ↑ |
| peripheral nervous system | 1.930592181      | 53       | 27.45271659 | 2.0458E-09  | 3.65322E-08 | ↑ |
| liver                     | 2.354616702      | 42       | 17.83729809 | 2.4367E-09  | 3.80734E-08 | ↑ |
| bone marrow               | 2.963255439      | 27       | 9.111600587 | 1.23395E-07 | 1.71382E-06 | ↑ |
| pancreas                  | 3.080834585      | 25       | 8.114684288 | 2.22118E-07 | 2.52407E-06 | ↑ |
| small intestine           | 2.718937152      | 29       | 10.66593245 | 2.02047E-07 | 2.52407E-06 | ↑ |
| kidney                    | 1.918064268      | 44       | 22.93979442 | 4.47199E-07 | 4.29999E-06 | ↑ |
| intestine                 | 2.221135029      | 36       | 16.20792952 | 4.20422E-07 | 4.29999E-06 | ↑ |
| blood vessels             | 1.745652531      | 50       | 28.64258443 | 5.13434E-07 | 4.31913E-06 | ↑ |
| large intestine           | 2.349994772      | 33       | 14.04258443 | 5.18295E-07 | 4.31913E-06 | ↑ |
| skin                      | 1.630574422      | 52       | 31.89060206 | 2.17861E-06 | 1.70204E-05 | ↑ |
| upper limb                | 1.857791461      | 42       | 22.60748899 | 2.81971E-06 | 2.07332E-05 | ↑ |
| esophagus                 | 2.563931767      | 26       | 10.14067548 | 3.51541E-06 | 2.44126E-05 | ↑ |
| rectum                    | 2.906981257      | 22       | 7.567988253 | 4.02079E-06 | 2.64525E-05 | ↑ |
| stomach                   | 2.178214546      | 29       | 13.31365639 | 1.71877E-05 | 0.000107423 | ↑ |
| lower limb                | 1.730676254      | 41       | 23.69016153 | 2.7582E-05  | 0.000164178 | ↑ |
| eye                       | 1.623335346      | 45       | 27.72070485 | 3.83163E-05 | 0.000196444 | ↑ |
| toes                      | 1.864687889      | 35       | 18.76989721 | 3.92888E-05 | 0.000196444 | ↑ |
| hand                      | 1.811886528      | 37       | 20.42070485 | 3.68869E-05 | 0.000196444 | ↑ |
| anus                      | 3.237749978      | 16       | 4.941703377 | 3.73078E-05 | 0.000196444 | ↑ |
| digit                     | 1.818276212      | 36       | 19.7989721  | 4.81994E-05 | 0.000231728 | ↑ |
| wrist                     | 2.049501868      | 29       | 14.14977974 | 5.34153E-05 | 0.000247293 | ↑ |
| mouth                     | 1.72101191       | 39       | 22.66108664 | 6.23019E-05 | 0.000278133 | ↑ |
| foot                      | 1.730147286      | 37       | 21.38546256 | 0.000104446 | 0.000450197 | ↑ |
| neck                      | 1.84956969       | 32       | 17.30132159 | 0.000128351 | 0.000478718 | ↑ |
| elbow                     | 1.989379128      | 28       | 14.07474302 | 0.000130211 | 0.000478718 | ↑ |
| shoulder                  | 1.954727215      | 29       | 14.83582966 | 0.000125264 | 0.000478718 | ↑ |
| forearm                   | 2.090930562      | 26       | 12.43465492 | 0.000116351 | 0.000478718 | ↑ |
| arm                       | 2.034545334      | 27       | 13.27077827 | 0.000126729 | 0.000478718 | ↑ |



|                    |             |    |             |             |             |   |
|--------------------|-------------|----|-------------|-------------|-------------|---|
| knee               | 1.949294623 | 28 | 14.36417034 | 0.000184279 | 0.000654162 | ↑ |
| fingers            | 1.757219292 | 34 | 19.34875184 | 0.000188399 | 0.000654162 | ↑ |
| gallbladder        | 3.901765717 | 11 | 2.819236417 | 0.000195332 | 0.000659905 | ↑ |
| ankle              | 1.934855403 | 28 | 14.47136564 | 0.000208953 | 0.000669721 | ↑ |
| hip                | 1.934855403 | 28 | 14.47136564 | 0.000208953 | 0.000669721 | ↑ |
| breast             | 2.152072656 | 23 | 10.68737151 | 0.000228062 | 0.000712692 | ↑ |
| prostate           | 2.289268006 | 20 | 8.736417034 | 0.00031429  | 0.000944124 | ↑ |
| coagulation system | 2.158074413 | 22 | 10.19427313 | 0.000317226 | 0.000944124 | ↑ |
| spleen             | 2.437123486 | 18 | 7.385756241 | 0.000337432 | 0.000980906 | ↑ |
| meninges           | 2.759990273 | 15 | 5.434801762 | 0.000358737 | 0.001019139 |   |
| chest wall         | 1.937036363 | 25 | 12.90631424 | 0.000532903 | 0.00146466  |   |
| shin               | 1.977830486 | 24 | 12.13450808 | 0.000538995 | 0.00146466  |   |
| white blood cells  | 1.674003888 | 33 | 19.71321586 | 0.000632785 | 0.00168294  |   |
| scapula            | 2.034022564 | 22 | 10.81600587 | 0.000698642 | 0.001782249 |   |
| thigh              | 1.943493151 | 24 | 12.34889868 | 0.000690484 | 0.001782249 |   |
| red blood cells    | 2.053502197 | 21 | 10.22643172 | 0.000856295 | 0.002140737 |   |
| urinary bladder    | 2.411312988 | 16 | 6.635389134 | 0.000875616 | 0.002146118 |   |
| clavicle           | 1.954598826 | 22 | 11.25550661 | 0.001168853 | 0.002809743 |   |
| sternum            | 1.947180993 | 22 | 11.29838473 | 0.001226828 | 0.002893463 |   |
| humerus            | 1.927069265 | 22 | 11.41629956 | 0.001399292 | 0.003239101 |   |
| fibula             | 1.961002098 | 21 | 10.70881057 | 0.001509248 | 0.003371795 |   |
| rib                | 1.912701554 | 22 | 11.5020558  | 0.001537538 | 0.003371795 |   |
| rib cage           | 1.912701554 | 22 | 11.5020558  | 0.001537538 | 0.003371795 |   |
| tibia              | 1.93581136  | 21 | 10.84816446 | 0.001763798 | 0.003801289 |   |
| ulna               | 1.898295636 | 21 | 11.06255507 | 0.002227137 | 0.00471851  |   |
| face               | 1.563753525 | 32 | 20.46358297 | 0.002627691 | 0.005474356 |   |
| radius             | 1.865753425 | 21 | 11.25550661 | 0.002729424 | 0.005502872 |   |
| maxilla            | 1.646945015 | 28 | 17.00117474 | 0.002687544 | 0.005502872 |   |
| mandible           | 1.636625811 | 28 | 17.10837004 | 0.002948477 | 0.005850153 |   |
| femur              | 1.834308142 | 21 | 11.44845815 | 0.00332504  | 0.006494218 |   |
| jaws               | 1.614372555 | 28 | 17.34419971 | 0.003600846 | 0.006924704 |   |
| spinal column      | 1.671822065 | 25 | 14.95374449 | 0.004138516 | 0.007838098 |   |
| vertebrae          | 1.696139477 | 24 | 14.14977974 | 0.004255894 | 0.0079401   |   |
| pelvis             | 1.669578009 | 24 | 14.37488987 | 0.005187285 | 0.009263008 |   |
| biliary tract      | 2.665362035 | 10 | 3.751835536 | 0.005165672 | 0.009263008 |   |
| diaphragm          | 2.672999176 | 10 | 3.741116006 | 0.005075078 | 0.009263008 |   |
| bronchus           | 2.650217933 | 10 | 3.773274596 | 0.0053506   | 0.009420071 |   |
| lymph nodes        | 2.541898399 | 10 | 3.934067548 | 0.006905161 | 0.011988126 |   |
| blood              | 1.370843699 | 39 | 28.44963289 | 0.007775177 | 0.013313659 |   |

|                     |             |    |             |             |             |
|---------------------|-------------|----|-------------|-------------|-------------|
| skull               | 1.430663429 | 34 | 23.76519824 | 0.007929515 | 0.013394452 |
| tongue              | 2.192658939 | 11 | 5.016740088 | 0.01184723  | 0.019745383 |
| thymus              | 4.021020312 | 5  | 1.243465492 | 0.015213536 | 0.025022263 |
| abdominal wall      | 1.920157898 | 12 | 6.24948605  | 0.020674872 | 0.033563105 |
| cerebellum          | 1.48311083  | 20 | 13.48516887 | 0.035501591 | 0.056893575 |
| cranial nerves      | 1.390692773 | 25 | 17.97665198 | 0.036947932 | 0.058461917 |
| pharynx             | 1.738279588 | 12 | 6.903377386 | 0.038343926 | 0.059912385 |
| adrenal gland       | 2.050278489 | 8  | 3.901908957 | 0.042060394 | 0.064908015 |
| testis              | 1.520508544 | 17 | 11.1804699  | 0.042771251 | 0.065200078 |
| placenta            | 2.322514637 | 6  | 2.583406755 | 0.05013143  | 0.075499141 |
| heart valve         | 2.092992624 | 7  | 3.344493392 | 0.051792473 | 0.077072133 |
| eyelid              | 1.479375383 | 17 | 11.49133627 | 0.052698673 | 0.077498048 |
| uterus              | 1.560367261 | 14 | 8.972246696 | 0.053871159 | 0.078301103 |
| thyroid             | 2.229984173 | 6  | 2.690602056 | 0.057158111 | 0.082123722 |
| penis               | 1.561299937 | 12 | 7.685903084 | 0.071155597 | 0.101073292 |
| teeth               | 1.552638079 | 12 | 7.728781204 | 0.073365928 | 0.103042033 |
| ovary               | 1.566663181 | 11 | 7.021292217 | 0.080421897 | 0.111697079 |
| nails               | 1.655994164 | 9  | 5.434801762 | 0.084386334 | 0.115915294 |
| sweat gland         | 1.700556507 | 7  | 4.116299559 | 0.108172762 | 0.146973862 |
| urethra             | 1.691745333 | 7  | 4.13773862  | 0.110078556 | 0.147955048 |
| duodenum            | 1.911632607 | 5  | 2.615565345 | 0.118650064 | 0.156118505 |
| salivary gland      | 1.919499408 | 5  | 2.604845815 | 0.117459241 | 0.156118505 |
| lacrimal apparatus  | 2.717116638 | 3  | 1.104111601 | 0.126686579 | 0.164956483 |
| larynx              | 1.510731518 | 8  | 5.295447871 | 0.140141209 | 0.180594342 |
| cheek               | 1.469097185 | 8  | 5.445521292 | 0.154747132 | 0.196042087 |
| trachea             | 1.702329767 | 5  | 2.937151248 | 0.15683367  | 0.196042087 |
| vocal cords         | 1.594661047 | 6  | 3.762555066 | 0.156006203 | 0.196042087 |
| lips                | 1.305424893 | 13 | 9.958443465 | 0.164920194 | 0.204109151 |
| ear                 | 1.235598294 | 18 | 14.56784141 | 0.1681863   | 0.206110661 |
| aorta               | 1.75188115  | 4  | 2.283259912 | 0.181059863 | 0.219732844 |
| sinuses             | 2.057816277 | 3  | 1.457856094 | 0.18350595  | 0.220560036 |
| ureter              | 1.371877518 | 8  | 5.831424376 | 0.195590462 | 0.232845789 |
| cerebrospinal fluid | 1.529306086 | 5  | 3.269456681 | 0.200886131 | 0.236894022 |
| nose                | 1.209564619 | 16 | 13.22790015 | 0.208524365 | 0.24360323  |
| parathyroid         | 2.743755036 | 2  | 0.728928047 | 0.214224274 | 0.247944761 |
| appendix            | 0           | 0  | 0.246549192 | 0.219861344 | 0.252134569 |
| epiglottis          | 1.675826429 | 3  | 1.790161527 | 0.240021302 | 0.27275148  |
| chin                | 1.222643135 | 10 | 8.179001468 | 0.257201051 | 0.289640823 |
| pituitary gland     | 1.173429827 | 6  | 5.113215859 | 0.340044208 | 0.379513625 |
| hypothalamus        | 1.260644206 | 2  | 1.586490455 | 0.374778817 | 0.414578338 |

|                |             |    |             |             |             |
|----------------|-------------|----|-------------|-------------|-------------|
| middle ear     | 1.099658207 | 6  | 5.456240822 | 0.39252034  | 0.430395109 |
| hair           | 1.028908139 | 12 | 11.66284875 | 0.445025672 | 0.483723556 |
| outer ear      | 0.683783978 | 7  | 10.23715125 | 0.137495796 | 1           |
| inner ear      | 0.64558942  | 2  | 3.0979442   | 0.286156549 | 1           |
| vagina         | 0.929160072 | 5  | 5.381204112 | 0.456603686 | 1           |
| vulva          | 0           | 0  | 3.976945668 | 0.008189329 | 1           |
| olfactory bulb | 0           | 0  | 1.682966226 | 0.090266464 | 1           |
| forehead       | 0.656955431 | 6  | 9.133039648 | 0.133469642 | 1           |
| scalp          | 0.88007237  | 2  | 2.272540382 | 0.466393856 | 1           |
| lymph vessels  | 0           | 0  | 0.836123348 | 0.214681616 | 1           |
| fallopian tube | 0.701411062 | 1  | 1.425697504 | 0.407973224 | 1           |
| vas deferens   | 0           | 0  | 1.211306902 | 0.146434826 | 1           |

<YMJ Organs>

| Name                      | Enrichment ratio | Observed | Expected    | P-value     | FDR         |   |
|---------------------------|------------------|----------|-------------|-------------|-------------|---|
| brain                     | 1.697246618      | 42       | 24.74596182 | 2.93418E-08 | 3.66773E-06 | ↑ |
| head                      | 1.553870482      | 43       | 27.67283407 | 2.13975E-07 | 1.33734E-05 | ↑ |
| peripheral nerves         | 2.246450996      | 29       | 12.9092511  | 1.01863E-06 | 4.24429E-05 | ↑ |
| heart                     | 2.080639439      | 31       | 14.89926579 | 1.42485E-06 | 4.45267E-05 | ↑ |
| peripheral nervous system | 1.87346917       | 31       | 16.54684288 | 1.55985E-05 | 0.000389963 | ↑ |
| lung                      | 2.106853879      | 26       | 12.34067548 | 2.4017E-05  | 0.000500355 | ↑ |
| spinal cord               | 2.234251969      | 22       | 9.846696035 | 7.63887E-05 | 0.001241311 |   |
| pancreas                  | 3.066830791      | 15       | 4.891042584 | 7.94439E-05 | 0.001241311 |   |
| kidney                    | 1.880416313      | 26       | 13.8267254  | 0.000180095 | 0.002501313 |   |
| blood vessels             | 1.679793821      | 29       | 17.26402349 | 0.000384872 | 0.004674409 |   |
| small intestine           | 2.488807675      | 16       | 6.428781204 | 0.000411348 | 0.004674409 |   |
| intestine                 | 2.047258297      | 20       | 9.769162996 | 0.000646922 | 0.006738768 |   |
| liver                     | 1.953261582      | 21       | 10.75124816 | 0.000798133 | 0.007326324 |   |
| coagulation system        | 2.441210209      | 15       | 6.144493392 | 0.000820548 | 0.007326324 |   |
| large intestine           | 2.126648161      | 18       | 8.464023495 | 0.000930015 | 0.007750121 |   |
| chest wall                | 2.185329206      | 17       | 7.779148311 | 0.001042505 | 0.008144568 |   |
| rectum                    | 2.630697914      | 12       | 4.561527166 | 0.001852378 | 0.01362043  |   |
| forearm                   | 2.134796238      | 16       | 7.494860499 | 0.001988799 | 0.013811103 |   |
| skin                      | 1.508708938      | 29       | 19.22173275 | 0.002650119 | 0.015852737 |   |
| wrist                     | 1.993285124      | 17       | 8.528634361 | 0.002739294 | 0.015852737 |   |
| gallbladder               | 4.119426201      | 7        | 1.699265786 | 0.002790082 | 0.015852737 |   |
| bone marrow               | 2.367112299      | 13       | 5.491923642 | 0.002688283 | 0.015852737 |   |
| breast                    | 2.173338196      | 14       | 6.441703377 | 0.00364455  | 0.017982884 |   |
| neck                      | 1.821983778      | 19       | 10.42819383 | 0.003702296 | 0.017982884 |   |
| arm                       | 2.000293729      | 16       | 7.998825257 | 0.00374044  | 0.017982884 |   |
| anus                      | 3.021593374      | 9        | 2.97856094  | 0.003629063 | 0.017982884 |   |
| spinal column             | 1.886119257      | 17       | 9.013215859 | 0.00477628  | 0.02132268  |   |
| abdominal wall            | 2.654763761      | 10       | 3.76681351  | 0.004669999 | 0.02132268  |   |
| vertebrae                 | 1.876033058      | 16       | 8.528634361 | 0.006810304 | 0.024322513 |   |
| rib                       | 2.019401847      | 14       | 6.932745962 | 0.006727232 | 0.024322513 |   |
| rib cage                  | 2.019401847      | 14       | 6.932745962 | 0.006727232 | 0.024322513 |   |
| sternum                   | 2.055804727      | 14       | 6.809985316 | 0.005808807 | 0.024322513 |   |
| elbow                     | 1.886034757      | 16       | 8.483406755 | 0.006486151 | 0.024322513 |   |
| upper limb                | 1.614509246      | 22       | 13.62643172 | 0.006562534 | 0.024322513 |   |

|                   |             |    |             |             |             |
|-------------------|-------------|----|-------------|-------------|-------------|
| eyelid            | 2.021285617 | 14 | 6.926284875 | 0.00667614  | 0.024322513 |
| pelvis            | 1.846654464 | 16 | 8.664317181 | 0.007863297 | 0.025202876 |
| mandible          | 1.745557075 | 18 | 10.31189427 | 0.007751962 | 0.025202876 |
| maxilla           | 1.756563109 | 18 | 10.24728341 | 0.007276384 | 0.025202876 |
| knee              | 1.848032564 | 16 | 8.657856094 | 0.007810312 | 0.025202876 |
| eye               | 1.496256064 | 25 | 16.70837004 | 0.008512886 | 0.02533597  |
| ankle             | 1.834343434 | 16 | 8.72246696  | 0.008353495 | 0.02533597  |
| hip               | 1.834343434 | 16 | 8.72246696  | 0.008353495 | 0.02533597  |
| tibia             | 1.988187208 | 13 | 6.538619677 | 0.010460047 | 0.025637369 |
| fibula            | 2.014059514 | 13 | 6.454625551 | 0.00949867  | 0.025637369 |
| scapula           | 1.994098567 | 13 | 6.519236417 | 0.010231671 | 0.025637369 |
| jaws              | 1.721822677 | 18 | 10.45403818 | 0.008889096 | 0.025637369 |
| shoulder          | 1.789280084 | 16 | 8.942143906 | 0.010434851 | 0.025637369 |
| hand              | 1.624910523 | 20 | 12.30837004 | 0.009919419 | 0.025637369 |
| shin              | 1.914150337 | 14 | 7.313950073 | 0.010348982 | 0.025637369 |
| diaphragm         | 3.104324043 | 7  | 2.254919236 | 0.010085533 | 0.025637369 |
| stomach           | 1.869235837 | 15 | 8.024669604 | 0.009409912 | 0.025637369 |
| skull             | 1.535859269 | 22 | 14.32422907 | 0.011911551 | 0.027978993 |
| ulna              | 1.949656448 | 13 | 6.66784141  | 0.012086925 | 0.027978993 |
| thigh             | 1.880918561 | 14 | 7.443171806 | 0.011879241 | 0.027978993 |
| clavicle          | 1.916233766 | 13 | 6.784140969 | 0.013714608 | 0.030612964 |
| radius            | 1.916233766 | 13 | 6.784140969 | 0.013714608 | 0.030612964 |
| prostate          | 2.088957055 | 11 | 5.265785609 | 0.014112764 | 0.030769956 |
| mouth             | 1.537477423 | 21 | 13.65873715 | 0.014538238 | 0.030769956 |
| femur             | 1.883937692 | 13 | 6.900440529 | 0.015508058 | 0.030769956 |
| humerus           | 1.889244558 | 13 | 6.881057269 | 0.015197188 | 0.030769956 |
| digit             | 1.592139588 | 19 | 11.93362702 | 0.015344092 | 0.030769956 |
| white blood cells | 1.599065698 | 19 | 11.88193833 | 0.014692584 | 0.030769956 |
| esophagus         | 1.963290409 | 12 | 6.112187959 | 0.015478255 | 0.030769956 |
| foot              | 1.551606288 | 20 | 12.88986784 | 0.016194586 | 0.031630051 |
| urinary bladder   | 2.250330445 | 9  | 3.999412628 | 0.018417532 | 0.03541833  |
| toes              | 1.591038887 | 18 | 11.3133627  | 0.019035782 | 0.036052618 |
| face              | 1.540430497 | 19 | 12.33421439 | 0.02122615  | 0.039601026 |
| lower limb        | 1.470691074 | 21 | 14.27900147 | 0.023423756 | 0.043058376 |
| fingers           | 1.54343994  | 18 | 11.66226138 | 0.025170609 | 0.045598929 |
| placenta          | 3.211052433 | 5  | 1.55712188  | 0.029288975 | 0.052301742 |
| biliary tract     | 2.653246753 | 6  | 2.261380323 | 0.03135673  | 0.054958543 |
| spleen            | 2.02170471  | 9  | 4.451688693 | 0.031656121 | 0.054958543 |
| red blood cells   | 1.784591195 | 11 | 6.163876652 | 0.036459831 | 0.062431217 |

|                 |             |    |             |             |             |
|-----------------|-------------|----|-------------|-------------|-------------|
| teeth           | 1.931975791 | 9  | 4.658443465 | 0.039485495 | 0.066698471 |
| testis          | 1.632310642 | 11 | 6.738913363 | 0.059977683 | 0.099962805 |
| thymus          | 4.002742947 | 3  | 0.74948605  | 0.073227588 | 0.120440111 |
| uterus          | 1.664222874 | 9  | 5.407929515 | 0.078597253 | 0.127592943 |
| nose            | 1.505083247 | 12 | 7.97298091  | 0.079770502 | 0.127790748 |
| tongue          | 1.984265734 | 6  | 3.023788546 | 0.080763753 | 0.127790748 |
| bronchus        | 2.19847624  | 5  | 2.274302496 | 0.082537921 | 0.128965501 |
| duodenum        | 2.537257824 | 4  | 1.57650514  | 0.088057439 | 0.135891109 |
| thyroid         | 2.466497646 | 4  | 1.621732746 | 0.093219024 | 0.142102171 |
| larynx          | 1.879830696 | 6  | 3.191776799 | 0.095242464 | 0.143437446 |
| chin            | 1.622780889 | 8  | 4.929809104 | 0.104150447 | 0.153162422 |
| cheek           | 1.828024338 | 6  | 3.282232012 | 0.103569363 | 0.153162422 |
| pharynx         | 1.682312253 | 7  | 4.160939794 | 0.109388243 | 0.158994539 |
| blood           | 1.224652326 | 21 | 17.14772394 | 0.130654649 | 0.187722197 |
| appendix        | 0           | 0  | 0.148604993 | 0.138714535 | 0.197037692 |
| heart valve     | 1.984265734 | 4  | 2.015859031 | 0.142646947 | 0.200346836 |
| parathyroid     | 4.552139037 | 2  | 0.439353891 | 0.152814187 | 0.212241927 |
| penis           | 1.51103081  | 7  | 4.632599119 | 0.155808552 | 0.214022736 |
| aorta           | 2.179897567 | 3  | 1.376211454 | 0.169940828 | 0.230897864 |
| pituitary gland | 1.622355632 | 5  | 3.081938326 | 0.174024815 | 0.233904321 |
| vocal cords     | 1.763791764 | 4  | 2.26784141  | 0.178046985 | 0.236764608 |
| adrenal gland   | 1.700799201 | 4  | 2.351835536 | 0.19044059  | 0.250579723 |
| lymph nodes     | 1.68689621  | 4  | 2.371218796 | 0.193340543 | 0.251745499 |
| meninges        | 1.526358257 | 5  | 3.275770925 | 0.200255947 | 0.258061788 |
| ovary           | 1.417765441 | 6  | 4.232011747 | 0.2117973   | 0.267420833 |
| sweat gland     | 1.612215909 | 4  | 2.481057269 | 0.210046081 | 0.267420833 |
| cranial nerves  | 1.199788584 | 13 | 10.83524229 | 0.235581598 | 0.291561383 |
| ureter          | 1.422543449 | 5  | 3.514831131 | 0.23451391  | 0.291561383 |
| cerebellum      | 1.230307848 | 10 | 8.12804699  | 0.245729743 | 0.301139392 |
| hypothalamus    | 2.091523342 | 2  | 0.956240822 | 0.256298324 | 0.311041655 |
| epiglottis      | 1.853565596 | 2  | 1.079001468 | 0.278548812 | 0.334794245 |
| hair            | 1.138034759 | 8  | 7.029662261 | 0.343862028 | 0.405497675 |
| nails           | 1.221086606 | 4  | 3.275770925 | 0.34212251  | 0.405497675 |
| forehead        | 1.089948784 | 6  | 5.504845815 | 0.399679589 | 0.462592117 |
| trachea         | 1.129727936 | 2  | 1.770337739 | 0.411408065 | 0.47179824  |
| sinuses         | 1.138034759 | 1  | 0.878707783 | 0.424340245 | 0.477860636 |
| fallopian tube  | 1.163704716 | 1  | 0.859324523 | 0.421308324 | 0.477860636 |
| ear             | 1.024984949 | 9  | 8.78061674  | 0.453543937 | 0.506187429 |
| lips            | 0.999608572 | 6  | 6.002349486 | 0.478061564 | 0.528829163 |
| outer ear       | 0.972394098 | 6  | 6.170337739 | 0.490675206 | 0.999999997 |

|                     |             |   |             |             |             |
|---------------------|-------------|---|-------------|-------------|-------------|
| middle ear          | 0.912216467 | 3 | 3.288693098 | 0.465513762 | 0.999999997 |
| inner ear           | 0           | 0 | 1.867254038 | 0.073728687 | 0.999999997 |
| vagina              | 0.616624411 | 2 | 3.243465492 | 0.25717468  | 0.999999997 |
| vulva               | 0           | 0 | 2.397063142 | 0.042171247 | 0.999999997 |
| urethra             | 0.801931229 | 2 | 2.493979442 | 0.409955138 | 0.999999997 |
| olfactory bulb      | 0           | 0 | 1.014390602 | 0.178582243 | 0.999999997 |
| cerebrospinal fluid | 0.507451565 | 1 | 1.970631424 | 0.269682046 | 0.999999997 |
| scalp               | 0           | 0 | 1.369750367 | 0.123791808 | 0.999999997 |
| lymph vessels       | 0           | 0 | 0.503964758 | 0.300701636 | 0.999999997 |
| lacrimal apparatus  | 0           | 0 | 0.665491924 | 0.255159699 | 0.999999997 |
| salivary gland      | 0.636924804 | 1 | 1.570044053 | 0.365906776 | 0.999999997 |
| vas deferens        | 0           | 0 | 0.73010279  | 0.238895457 | 0.999999997 |

<Common target Organs>

| Name                      | Enrichment ratio | Observed | Expected    | P-value     | FDR         |   |
|---------------------------|------------------|----------|-------------|-------------|-------------|---|
| brain                     | 1.734700376      | 40       | 23.05873715 | 1.30281E-08 | 1.62852E-06 | ↑ |
| head                      | 1.551226346      | 40       | 25.78604993 | 7.5327E-07  | 4.70794E-05 | ↑ |
| peripheral nerves         | 2.244561635      | 27       | 12.02907489 | 2.57986E-06 | 9.05825E-05 | ↑ |
| heart                     | 2.088824488      | 29       | 13.88340675 | 2.89864E-06 | 9.05825E-05 | ↑ |
| peripheral nervous system | 1.88083923       | 29       | 15.41864905 | 2.71738E-05 | 0.000679346 | ↑ |
| pancreas                  | 3.291233044      | 15       | 4.557562408 | 3.36264E-05 | 0.000700551 | ↑ |
| lung                      | 2.087089771      | 24       | 11.49926579 | 6.19889E-05 | 0.001106946 |   |
| kidney                    | 1.940392067      | 25       | 12.88399413 | 0.000126451 | 0.001975794 |   |
| small intestine           | 2.670915553      | 16       | 5.990455213 | 0.000173798 | 0.002413862 |   |
| intestine                 | 2.197057685      | 20       | 9.1030837   | 0.000221834 | 0.002506362 |   |
| spinal cord               | 2.179758018      | 20       | 9.175330396 | 0.000246564 | 0.002506362 |   |
| liver                     | 2.096183161      | 21       | 10.01820852 | 0.000260662 | 0.002506362 |   |
| blood vessels             | 1.740543304      | 28       | 16.08693098 | 0.000212462 | 0.002506362 |   |
| coagulation system        | 2.619835347      | 15       | 5.725550661 | 0.000375775 | 0.003131461 |   |
| large intestine           | 2.282256563      | 18       | 7.886930984 | 0.000364495 | 0.003131461 |   |
| forearm                   | 2.291000841      | 16       | 6.983847283 | 0.000898415 | 0.00701887  |   |
| rectum                    | 2.823188005      | 12       | 4.25051395  | 0.001015776 | 0.007468944 |   |
| wrist                     | 2.139135255      | 17       | 7.947136564 | 0.001195559 | 0.008302496 |   |
| chest wall                | 2.207276558      | 16       | 7.248751836 | 0.001315983 | 0.00865778  |   |
| bone marrow               | 2.540315638      | 13       | 5.117474302 | 0.001424019 | 0.008900121 |   |
| arm                       | 2.146656685      | 16       | 7.453450808 | 0.001742797 | 0.010373792 |   |
| gallbladder               | 4.420847631      | 7        | 1.583406755 | 0.001967994 | 0.011181782 |   |
| anus                      | 3.242685572      | 9        | 2.775477239 | 0.002340616 | 0.012720738 |   |
| sternum                   | 2.206229463      | 14       | 6.345668135 | 0.003035602 | 0.015560815 |   |
| elbow                     | 2.024037301      | 16       | 7.904992658 | 0.003112163 | 0.015560815 |   |
| rib                       | 2.167162958      | 14       | 6.460058737 | 0.003540131 | 0.016389496 |   |
| rib cage                  | 2.167162958      | 14       | 6.460058737 | 0.003540131 | 0.016389496 |   |
| knee                      | 1.983254459      | 16       | 8.067547724 | 0.003787001 | 0.016906254 |   |
| ankle                     | 1.968563686      | 16       | 8.127753304 | 0.004066082 | 0.016942009 |   |
| hip                       | 1.968563686      | 16       | 8.127753304 | 0.004066082 | 0.016942009 |   |
| breast                    | 2.165765589      | 13       | 6.002496329 | 0.00522502  | 0.019836322 |   |
| fibula                    | 2.161429722      | 13       | 6.014537445 | 0.005307742 | 0.019836322 |   |
| scapula                   | 2.140008219      | 13       | 6.074743025 | 0.005737351 | 0.019836322 |   |
| tibia                     | 2.133664321      | 13       | 6.092804699 | 0.005871551 | 0.019836322 |   |



|                   |             |    |             |             |             |
|-------------------|-------------|----|-------------|-------------|-------------|
| shin              | 2.054210118 | 14 | 6.815271659 | 0.005563933 | 0.019836322 |
| shoulder          | 1.920203017 | 16 | 8.332452276 | 0.005146236 | 0.019836322 |
| spinal column     | 1.905061631 | 16 | 8.398678414 | 0.005542782 | 0.019836322 |
| thigh             | 2.018546748 | 14 | 6.935682819 | 0.006432734 | 0.02116031  |
| ulna              | 2.092314237 | 13 | 6.213215859 | 0.006832097 | 0.021897747 |
| diaphragm         | 3.331469704 | 7  | 2.101174743 | 0.007312326 | 0.02285102  |
| clavicle          | 2.056445993 | 13 | 6.321585903 | 0.007800516 | 0.023215823 |
| radius            | 2.056445993 | 13 | 6.321585903 | 0.007800516 | 0.023215823 |
| abdominal wall    | 2.564113291 | 9  | 3.509985316 | 0.009013975 | 0.02360355  |
| humerus           | 2.027481965 | 13 | 6.411894273 | 0.008688482 | 0.02360355  |
| femur             | 2.021786791 | 13 | 6.429955947 | 0.008875342 | 0.02360355  |
| vertebrae         | 1.887472284 | 15 | 7.947136564 | 0.008219864 | 0.02360355  |
| pelvis            | 1.857914552 | 15 | 8.073568282 | 0.009408528 | 0.02360355  |
| neck              | 1.749478647 | 17 | 9.717180617 | 0.009228553 | 0.02360355  |
| hand              | 1.656616094 | 19 | 11.469163   | 0.00944142  | 0.02360355  |
| skin              | 1.451608936 | 26 | 17.91116006 | 0.008723501 | 0.02360355  |
| upper limb        | 1.575130972 | 20 | 12.69735683 | 0.01269074  | 0.031104754 |
| white blood cells | 1.625751005 | 18 | 11.07180617 | 0.014525748 | 0.034917663 |
| digit             | 1.618709311 | 18 | 11.11997063 | 0.015146256 | 0.035722301 |
| toes              | 1.612597679 | 17 | 10.54199706 | 0.019571223 | 0.045303757 |
| spleen            | 2.169634323 | 9  | 4.148164464 | 0.021884644 | 0.04821217  |
| prostate          | 2.038006883 | 10 | 4.906754772 | 0.022024496 | 0.04821217  |
| esophagus         | 1.931366988 | 11 | 5.695447871 | 0.022370447 | 0.04821217  |
| eyelid            | 1.859301056 | 12 | 6.454038179 | 0.021587568 | 0.04821217  |
| placenta          | 3.446007489 | 5  | 1.450954479 | 0.023748581 | 0.04947621  |
| red blood cells   | 1.915171039 | 11 | 5.743612335 | 0.023540073 | 0.04947621  |
| biliary tract     | 2.84738676  | 6  | 2.107195301 | 0.024405559 | 0.05001139  |
| fingers           | 1.56435376  | 17 | 10.8671072  | 0.025580232 | 0.051573048 |
| stomach           | 1.738541298 | 13 | 7.47753304  | 0.026413564 | 0.052407865 |
| teeth             | 2.073339873 | 9  | 4.34082232  | 0.027538049 | 0.053361059 |
| eye               | 1.413049629 | 22 | 15.569163   | 0.027747751 | 0.053361059 |
| foot              | 1.49862461  | 18 | 12.01101322 | 0.031017738 | 0.058745716 |
| urinary bladder   | 2.146656685 | 8  | 3.726725404 | 0.03236758  | 0.060387276 |
| maxilla           | 1.570910097 | 15 | 9.548604993 | 0.036178968 | 0.066505455 |
| mandible          | 1.561067302 | 15 | 9.608810573 | 0.037923517 | 0.068702024 |
| testis            | 1.751748006 | 11 | 6.279441997 | 0.039766269 | 0.071011195 |
| lower limb        | 1.427988081 | 19 | 13.30543319 | 0.04069313  | 0.071642835 |
| jaws              | 1.539841418 | 15 | 9.741262849 | 0.0419826   | 0.071888013 |
| skull             | 1.423479323 | 19 | 13.34757709 | 0.041883429 | 0.071888013 |

|                 |             |    |             |             |             |
|-----------------|-------------|----|-------------|-------------|-------------|
| mouth           | 1.414264947 | 18 | 12.72745962 | 0.051374428 | 0.086781129 |
| uterus          | 1.785995279 | 9  | 5.039207048 | 0.056511931 | 0.094186551 |
| thymus          | 4.295626577 | 3  | 0.698384728 | 0.06591701  | 0.108416136 |
| bronchus        | 2.359340355 | 5  | 2.119236417 | 0.068478947 | 0.111167122 |
| duodenum        | 2.722910836 | 4  | 1.469016153 | 0.076161575 | 0.119403037 |
| larynx          | 2.017379283 | 6  | 2.974155653 | 0.076417944 | 0.119403037 |
| face            | 1.392122041 | 16 | 11.49324523 | 0.07568597  | 0.119403037 |
| thyroid         | 2.646973083 | 4  | 1.511160059 | 0.08070971  | 0.124552021 |
| blood           | 1.251677174 | 20 | 15.97856094 | 0.113738347 | 0.173381626 |
| heart valve     | 2.12945591  | 4  | 1.878414097 | 0.12441893  | 0.185147217 |
| penis           | 1.62159404  | 7  | 4.316740088 | 0.123187834 | 0.185147217 |
| appendix        | 0           | 0  | 0.138472834 | 0.129873679 | 0.190990704 |
| tongue          | 1.774546592 | 5  | 2.817621145 | 0.140478394 | 0.204183712 |
| parathyroid     | 4.885222382 | 2  | 0.409397944 | 0.145410787 | 0.208872089 |
| pituitary gland | 1.74106458  | 5  | 2.871806167 | 0.147045951 | 0.208872089 |
| vocal cords     | 1.892849698 | 4  | 2.113215859 | 0.155852272 | 0.21889364  |
| adrenal gland   | 1.825247923 | 4  | 2.191483113 | 0.166880376 | 0.226931162 |
| lymph nodes     | 1.81032764  | 4  | 2.209544787 | 0.169462651 | 0.226931162 |
| meninges        | 1.638043008 | 5  | 3.052422907 | 0.169867603 | 0.226931162 |
| cheek           | 1.634818514 | 5  | 3.058443465 | 0.170652234 | 0.226931162 |
| pharynx         | 1.547492804 | 6  | 3.877239354 | 0.166736956 | 0.226931162 |
| sweat gland     | 1.730182927 | 4  | 2.311894273 | 0.184352452 | 0.242569016 |
| ureter          | 1.526631994 | 5  | 3.275183554 | 0.199869828 | 0.260247171 |
| hypothalamus    | 2.244561635 | 2  | 0.891042584 | 0.244461546 | 0.315027766 |
| cranial nerves  | 1.188533531 | 12 | 10.09647577 | 0.2553479   | 0.325698852 |
| chin            | 1.306140715 | 6  | 4.593685756 | 0.261132281 | 0.329712476 |
| epiglottis      | 1.989192347 | 2  | 1.005433186 | 0.265205328 | 0.33150666  |
| nose            | 1.211408467 | 9  | 7.429368576 | 0.272105743 | 0.336764533 |
| cerebellum      | 1.188297336 | 9  | 7.573861968 | 0.290308634 | 0.355770384 |
| ovary           | 1.267920313 | 5  | 3.943465492 | 0.30005934  | 0.364149684 |
| aorta           | 1.559601512 | 2  | 1.282378855 | 0.315948162 | 0.379745387 |
| trachea         | 1.212390956 | 2  | 1.649632893 | 0.387027161 | 0.456399954 |
| fallopian tube  | 1.248853842 | 1  | 0.800734214 | 0.412698583 | 0.47614948  |
| sinuses         | 1.221305595 | 1  | 0.818795888 | 0.415202347 | 0.47614948  |
| hair            | 1.068642396 | 7  | 6.550367107 | 0.412635061 | 0.47614948  |
| nails           | 0.982825805 | 3  | 3.052422907 | 0.476147678 | 0.533992126 |
| middle ear      | 0.978964014 | 3  | 3.064464023 | 0.478456945 | 0.533992126 |
| forehead        | 0.974750945 | 5  | 5.129515419 | 0.496495313 | 0.545455296 |
| ear             | 0.97776342  | 8  | 8.181938326 | 0.486968604 | 0.999999999 |
| lips            | 0.893958886 | 5  | 5.593098385 | 0.415034441 | 0.999999999 |
